# Supplementary material for: A Transcriptome-Wide Isoform Landscape of Melanocytic Nevi and Primary Melanomas Identifies Gene Isoforms Associated with Malignancy
Source: MDPI journal article supplement (doi:10.3390/ijms22137165), 2021-07-02
Supplement: s1 [file s1]

(A)

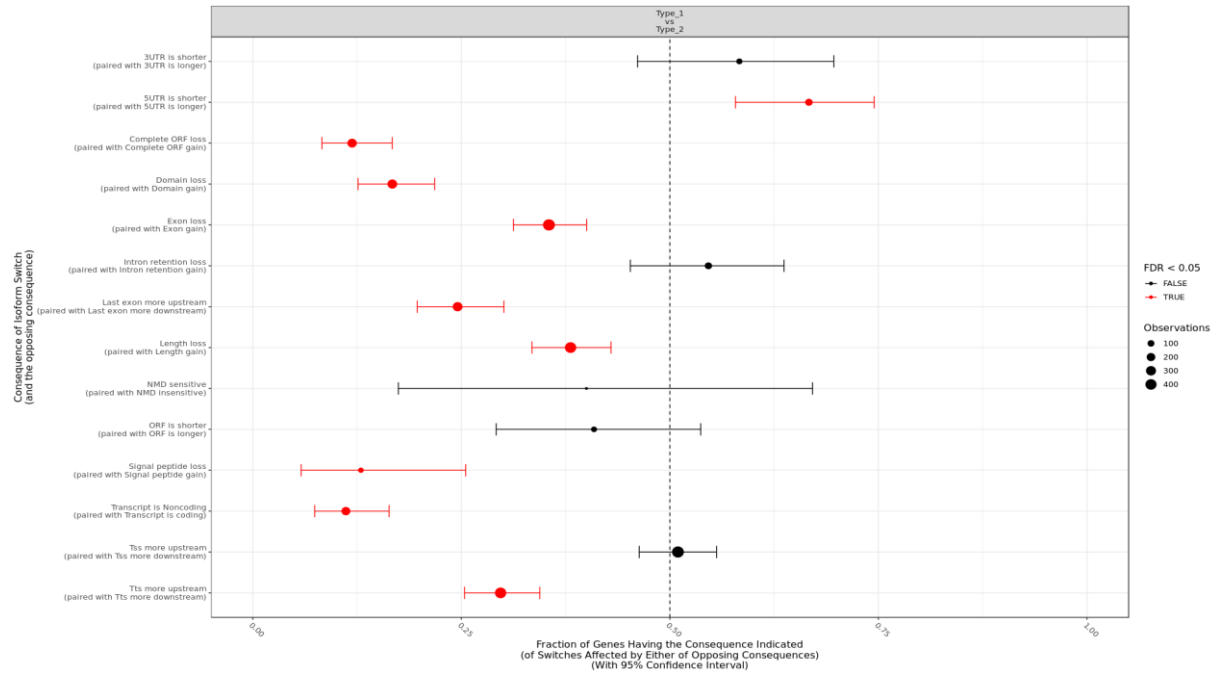

(B)

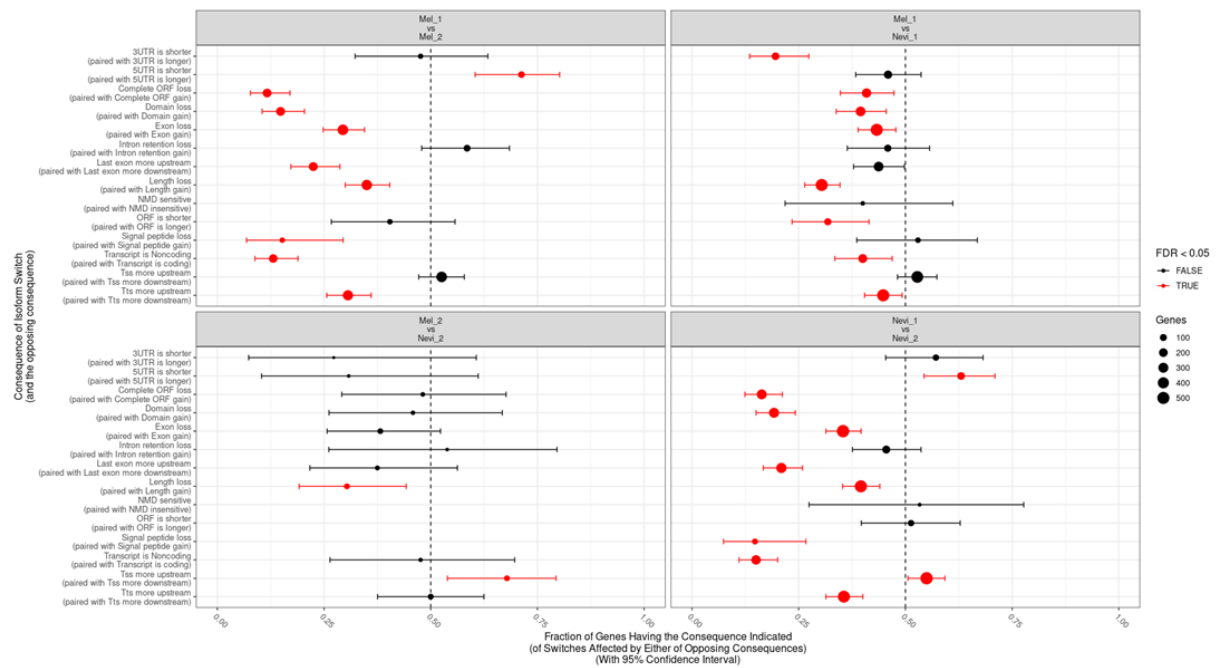

**Figure S1A and S1B. Transcriptomic consequences of isoform switches between type 1 and type 2 melanocytic lesions.** The fraction of genes (x axis) with indicated consequences (y axis) when comparing type 1 and type 2 lesions is shown.
