# Supplementary material for: A Transcriptome-Wide Isoform Landscape of Melanocytic Nevi and Primary Melanomas Identifies Gene Isoforms Associated with Malignancy
Source: MDPI journal article supplement (doi:10.3390/ijms22137165), 2021-07-02
Supplement: s1 [file s1]

## Supplementary Figures and Tables:

**Figure S1.** Transcriptomic consequences of isoform switches between type 1 and type 2 melanocytic lesions. The fraction of genes (x axis) with indicated consequences (y axis) when comparing type 1 and type 2 lesions is shown.

**Table S1:** List of isoform switches between the two comparison groups of melanomas versus benign melanocytic nevi and type 1 versus type 2 lesions.

**Table S2:** List of transcriptomic consequences of isoform switches between the two comparison groups of melanomas versus benign melanocytic nevi and type 1 versus type 2 lesions.

**Table S3:** List of GO categories of isoform switches between the two comparison groups of melanomas versus benign melanocytic nevi and type 1 versus type 2 lesions.
