# Supplementary material for: A Transcriptome-Wide Isoform Landscape of Melanocytic Nevi and Primary Melanomas Identifies Gene Isoforms Associated with Malignancy
Source: Int J Mol Sci. 2021 Jul 2;22(13):7165. doi: 10.3390/ijms22137165 (PMC8268681; doi:10.3390/ijms22137165)
Supplement: Supplementary file 1 [file ijms-22-07165-s001.zip]

Archive with 5 entries (5 files):
- 01_Supplementary Material_30062021.pdf
- 02_Figure_S1_30062021.pdf
- 03_Table_S1_30062021.xlsx
- 04_Table_S2_30062021.xlsx
- 05_Table_S3_30062021.xlsx
