# Supplementary material for: A Transcriptome-Wide Isoform Landscape of Melanocytic Nevi and Primary Melanomas Identifies Gene Isoforms Associated with Malignancy
Source: Int J Mol Sci. 2021 Jul 2;22(13):7165. doi: 10.3390/ijms22137165 (PMC8268681; doi:10.3390/ijms22137165)
Supplement: Supplementary file 1 [file ijms-22-07165-s001.zip › 03_Table_S1_30062021.xlsx]

## Sheet: Sheet1
Table S1: List of isoform switches between the two comparison groups of melanomas versus benign melanocytic nevi and type 1 versus type 2 lesions.
gene_ref	gene_id	gene_name	condition_1	condition_2	gene_switch_q_value	switchConsequencesGene	Rank		gene_ref	gene_id	gene_name	condition_1	condition_2	gene_switch_q_value	Rank
geneComp_00009812	ENSG00000154917.11	RAB6B	Naevi	Mel	2.01909e-14	TRUE	1		geneComp_00005695	ENSG00000125731.13	SH2D3A	Type_1	Type_2	2.48753e-19	1
geneComp_00000555	ENSG00000038945.15	MSR1	Naevi	Mel	1.6876e-12	TRUE	2		geneComp_00002094	ENSG00000099337.5	KCNK6	Type_1	Type_2	5.28249e-17	2
geneComp_00009301	ENSG00000150551.11	LYPD1	Naevi	Mel	3.07233e-12	TRUE	3		geneComp_00007640	ENSG00000138326.20	RPS24	Type_1	Type_2	3.39815e-13	3
geneComp_00019444	ENSG00000204248.10	COL11A2	Naevi	Mel	1.35564e-11	TRUE	4		geneComp_00007498	ENSG00000137648.18	TMPRSS4	Type_1	Type_2	3.09107e-12	4
geneComp_00009869	ENSG00000155511.18	GRIA1	Naevi	Mel	1.05709e-10	TRUE	5		geneComp_00001411	ENSG00000078114.18	NEBL	Type_1	Type_2	4.82854e-12	5
geneComp_00004259	ENSG00000114126.17	TFDP2	Naevi	Mel	1.66784e-10	TRUE	6		geneComp_00013447	ENSG00000173198.6	CYSLTR1	Type_1	Type_2	4.82854e-12	6
geneComp_00009223	ENSG00000149554.13	CHEK1	Naevi	Mel	1.07193e-09	TRUE	7		geneComp_00000464	ENSG00000027075.15	PRKCH	Type_1	Type_2	5.34027e-12	7
geneComp_00002676	ENSG00000102452.17	NALCN	Naevi	Mel	1.94321e-09	TRUE	8		geneComp_00010446	ENSG00000160223.17	ICOSLG	Type_1	Type_2	5.89467e-12	8
geneComp_00007044	ENSG00000135316.18	SYNCRIP	Naevi	Mel	2.86418e-09	TRUE	9		geneComp_00012844	ENSG00000170545.17	SMAGP	Type_1	Type_2	6.09192e-12	9
geneComp_00012448	ENSG00000168887.11	C2orf68	Naevi	Mel	3.57312e-09	TRUE	10		geneComp_00003239	ENSG00000106003.13	LFNG	Type_1	Type_2	8.27824e-12	10
geneComp_00014872	ENSG00000180628.15	PCGF5	Naevi	Mel	5.47036e-09	TRUE	11		geneComp_00017751	ENSG00000198624.13	CCDC69	Type_1	Type_2	9.38245e-12	11
geneComp_00007009	ENSG00000135094.11	SDS	Naevi	Mel	1.12326e-08	TRUE	12		geneComp_00013258	ENSG00000172296.13	SPTLC3	Type_1	Type_2	1.87256e-11	12
geneComp_00000474	ENSG00000028528.15	SNX1	Naevi	Mel	2.97504e-08	TRUE	13		geneComp_00002995	ENSG00000104892.17	KLC3	Type_1	Type_2	2.45837e-11	13
geneComp_00006296	ENSG00000130635.15	COL5A1	Naevi	Mel	3.83082e-08	TRUE	14		geneComp_00016857	ENSG00000189143.9	CLDN4	Type_1	Type_2	2.61524e-11	14
geneComp_00009737	ENSG00000154258.17	ABCA9	Naevi	Mel	5.66743e-08	TRUE	15		geneComp_00008892	ENSG00000146904.9	EPHA1	Type_1	Type_2	2.64631e-11	15
geneComp_00000159	ENSG00000006756.16	ARSD	Naevi	Mel	9.75585e-08	TRUE	16		geneComp_00003174	ENSG00000105699.16	LSR	Type_1	Type_2	4.5478e-11	16
geneComp_00005737	ENSG00000125851.10	PCSK2	Naevi	Mel	1.36146e-07	TRUE	17		geneComp_00012404	ENSG00000168685.15	IL7R	Type_1	Type_2	5.57477e-11	17
geneComp_00040720	ENSG00000254827.6	SLC22A18AS	Naevi	Mel	1.48376e-07	TRUE	18		geneComp_00014300	ENSG00000177570.14	SAMD12	Type_1	Type_2	5.85539e-11	18
geneComp_00001637	ENSG00000084693.16	AGBL5	Naevi	Mel	3.13271e-07	TRUE	19		geneComp_00016691	ENSG00000188522.15	FAM83G	Type_1	Type_2	1.06551e-10	19
geneComp_00010806	ENSG00000162735.18	PEX19	Naevi	Mel	3.13271e-07	TRUE	20		geneComp_00000943	ENSG00000065621.15	GSTO2	Type_1	Type_2	1.16416e-10	20
geneComp_00031815	ENSG00000235448.3	LURAP1L-AS1	Naevi	Mel	7.93111e-07	TRUE	21		geneComp_00016441	ENSG00000187554.14	TLR5	Type_1	Type_2	1.71162e-10	21
geneComp_00011208	ENSG00000164051.14	CCDC51	Naevi	Mel	1.02385e-06	TRUE	22		geneComp_00004112	ENSG00000112812.16	PRSS16	Type_1	Type_2	2.56453e-10	22
geneComp_00009050	ENSG00000148180.19	GSN	Naevi	Mel	1.03706e-06	TRUE	23		geneComp_00002472	ENSG00000101210.12	EEF1A2	Type_1	Type_2	2.80466e-10	23
geneComp_00054956	ENSG00000286125.1	AC006115.2	Naevi	Mel	1.05765e-06	TRUE	24		geneComp_00016638	ENSG00000188312.14	CENPP	Type_1	Type_2	3.18675e-10	24
geneComp_00003159	ENSG00000105662.16	CRTC1	Naevi	Mel	1.51693e-06	TRUE	25		geneComp_00007510	ENSG00000137709.10	POU2F3	Type_1	Type_2	3.93977e-10	25
geneComp_00001028	ENSG00000067992.15	PDK3	Naevi	Mel	1.6722e-06	TRUE	26		geneComp_00015159	ENSG00000182183.15	SHISAL2A	Type_1	Type_2	9.97846e-10	26
geneComp_00005395	ENSG00000123545.6	NDUFAF4	Naevi	Mel	1.7176e-06	TRUE	27		geneComp_00004157	ENSG00000113263.12	ITK	Type_1	Type_2	1.24817e-09	27
geneComp_00036560	ENSG00000248445.5	SEMA6A-AS1	Naevi	Mel	1.79798e-06	TRUE	28		geneComp_00007869	ENSG00000139725.8	RHOF	Type_1	Type_2	1.54324e-09	28
geneComp_00011372	ENSG00000164576.12	SAP30L	Naevi	Mel	2.17569e-06	TRUE	29		geneComp_00016977	ENSG00000196189.13	SEMA4A	Type_1	Type_2	1.54324e-09	29
geneComp_00005335	ENSG00000123080.12	CDKN2C	Naevi	Mel	2.52841e-06	TRUE	30		geneComp_00006288	ENSG00000130584.11	ZBTB46	Type_1	Type_2	2.23289e-09	30
geneComp_00016296	ENSG00000186818.12	LILRB4	Naevi	Mel	3.02439e-06	TRUE	31		geneComp_00000345	ENSG00000013725.14	CD6	Type_1	Type_2	2.28035e-09	31
geneComp_00055107	ENSG00000286288.1	AL109809.5	Naevi	Mel	3.37992e-06	TRUE	32		geneComp_00001353	ENSG00000076662.10	ICAM3	Type_1	Type_2	3.50408e-09	32
geneComp_00052982	ENSG00000280081.4	LINC01667	Naevi	Mel	3.61459e-06	TRUE	33		geneComp_00019785	ENSG00000205220.12	PSMB10	Type_1	Type_2	3.84917e-09	33
geneComp_00054197	ENSG00000284879.1	AC133644.3	Naevi	Mel	5.08165e-06	TRUE	34		geneComp_00014054	ENSG00000176390.12	CRLF3	Type_1	Type_2	5.04437e-09	34
geneComp_00015376	ENSG00000183111.12	ARHGEF37	Naevi	Mel	6.05676e-06	TRUE	35		geneComp_00021718	ENSG00000213413.2	PVRIG	Type_1	Type_2	7.35495e-09	35
geneComp_00003227	ENSG00000105968.18	H2AFV	Naevi	Mel	6.35119e-06	TRUE	36		geneComp_00008667	ENSG00000145244.12	CORIN	Type_1	Type_2	9.62858e-09	36
geneComp_00000432	ENSG00000023572.9	GLRX2	Naevi	Mel	9.14761e-06	TRUE	37		geneComp_00008180	ENSG00000141968.8	VAV1	Type_1	Type_2	1.04493e-08	37
geneComp_00007518	ENSG00000137745.12	MMP13	Naevi	Mel	9.66466e-06	TRUE	38		geneComp_00000027	ENSG00000002726.20	AOC1	Type_1	Type_2	1.0517e-08	38
geneComp_00005140	ENSG00000121207.12	LRAT	Naevi	Mel	1.14657e-05	TRUE	39		geneComp_00002996	ENSG00000104894.12	CD37	Type_1	Type_2	1.18999e-08	39
geneComp_00035429	ENSG00000243069.8	ARHGEF26-AS1	Naevi	Mel	1.39017e-05	TRUE	40		geneComp_00013237	ENSG00000172215.6	CXCR6	Type_1	Type_2	1.23059e-08	40
geneComp_00002564	ENSG00000101680.15	LAMA1	Naevi	Mel	1.40046e-05	TRUE	41		geneComp_00012117	ENSG00000167578.18	RAB4B	Type_1	Type_2	1.27911e-08	41
geneComp_00002684	ENSG00000102547.19	CAB39L	Naevi	Mel	1.40819e-05	TRUE	42		geneComp_00016305	ENSG00000186854.11	TRABD2A	Type_1	Type_2	1.37781e-08	42
geneComp_00013182	ENSG00000171984.15	SHLD1	Naevi	Mel	1.55366e-05	TRUE	43		geneComp_00006910	ENSG00000134504.14	KCTD1	Type_1	Type_2	1.45532e-08	43
geneComp_00016920	ENSG00000189403.15	HMGB1	Naevi	Mel	1.58069e-05	TRUE	44		geneComp_00016246	ENSG00000186567.13	CEACAM19	Type_1	Type_2	1.51216e-08	44
geneComp_00010677	ENSG00000162129.14	CLPB	Naevi	Mel	1.72939e-05	TRUE	45		geneComp_00014337	ENSG00000177721.4	ANXA2R	Type_1	Type_2	2.08507e-08	45
geneComp_00054037	ENSG00000284610.1	AC107918.4	Naevi	Mel	1.78935e-05	TRUE	46		geneComp_00001211	ENSG00000072858.10	SIDT1	Type_1	Type_2	2.68625e-08	46
geneComp_00003428	ENSG00000107562.16	CXCL12	Naevi	Mel	1.92837e-05	TRUE	47		geneComp_00010974	ENSG00000163362.11	INAVA	Type_1	Type_2	3.13987e-08	47
geneComp_00004746	ENSG00000117650.13	NEK2	Naevi	Mel	1.92867e-05	TRUE	48		geneComp_00015409	ENSG00000183250.12	LINC01547	Type_1	Type_2	3.84506e-08	48
geneComp_00002490	ENSG00000101290.14	CDS2	Naevi	Mel	2.21606e-05	TRUE	49		geneComp_00012010	ENSG00000167103.12	PIP5KL1	Type_1	Type_2	3.87294e-08	49
geneComp_00009539	ENSG00000152492.15	CCDC50	Naevi	Mel	3.07051e-05	TRUE	50		geneComp_00004409	ENSG00000115325.13	DOK1	Type_1	Type_2	5.00665e-08	50
geneComp_00015806	ENSG00000184903.9	IMMP2L	Naevi	Mel	3.07051e-05	TRUE	51		geneComp_00004500	ENSG00000115919.15	KYNU	Type_1	Type_2	5.88694e-08	51
geneComp_00049853	ENSG00000272602.6	ZNF595	Naevi	Mel	3.20066e-05	TRUE	52		geneComp_00003879	ENSG00000111319.13	SCNN1A	Type_1	Type_2	6.22706e-08	52
geneComp_00006904	ENSG00000134461.16	ANKRD16	Naevi	Mel	3.42516e-05	TRUE	53		geneComp_00010352	ENSG00000159496.14	RGL4	Type_1	Type_2	7.30092e-08	53
geneComp_00004249	ENSG00000114030.13	KPNA1	Naevi	Mel	3.44986e-05	TRUE	54		geneComp_00007298	ENSG00000136573.14	BLK	Type_1	Type_2	7.78907e-08	54
geneComp_00036169	ENSG00000245526.11	LINC00461	Naevi	Mel	3.49805e-05	TRUE	55		geneComp_00025454	ENSG00000225783.8	MIAT	Type_1	Type_2	1.1285e-07	55
geneComp_00003302	ENSG00000106392.10	C1GALT1	Naevi	Mel	3.61592e-05	TRUE	56		geneComp_00030832	ENSG00000233968.7	AL157895.1	Type_1	Type_2	1.21013e-07	56
geneComp_00003667	ENSG00000109452.12	INPP4B	Naevi	Mel	3.61592e-05	TRUE	57		geneComp_00006203	ENSG00000130052.13	STARD8	Type_1	Type_2	1.2694e-07	57
geneComp_00015516	ENSG00000183666.17	GUSBP1	Naevi	Mel	3.80573e-05	TRUE	58		geneComp_00008992	ENSG00000147601.14	TERF1	Type_1	Type_2	1.2694e-07	58
geneComp_00054255	ENSG00000285077.2	AC091057.6	Naevi	Mel	3.82638e-05	TRUE	59		geneComp_00011353	ENSG00000164483.17	SAMD3	Type_1	Type_2	1.50095e-07	59
geneComp_00011025	ENSG00000163520.14	FBLN2	Naevi	Mel	3.86407e-05	TRUE	60		geneComp_00000700	ENSG00000052344.16	PRSS8	Type_1	Type_2	1.58831e-07	60
geneComp_00040373	ENSG00000254416.6	LINC02732	Naevi	Mel	3.95292e-05	TRUE	61		geneComp_00011368	ENSG00000164543.7	STK17A	Type_1	Type_2	2.12945e-07	61
geneComp_00001321	ENSG00000075702.18	WDR62	Naevi	Mel	4.33032e-05	TRUE	62		geneComp_00008340	ENSG00000143226.13	FCGR2A	Type_1	Type_2	2.46257e-07	62
geneComp_00004897	ENSG00000119403.15	PHF19	Naevi	Mel	4.7268e-05	TRUE	63		geneComp_00022212	ENSG00000214530.9	STARD10	Type_1	Type_2	2.68622e-07	63
geneComp_00016863	ENSG00000189159.16	JPT1	Naevi	Mel	4.82767e-05	TRUE	64		geneComp_00021963	ENSG00000213906.10	LTB4R2	Type_1	Type_2	2.79608e-07	64
geneComp_00007296	ENSG00000136546.16	SCN7A	Naevi	Mel	4.90783e-05	TRUE	65		geneComp_00005498	ENSG00000124256.15	ZBP1	Type_1	Type_2	3.06817e-07	65
geneComp_00037093	ENSG00000249307.7	LINC01088	Naevi	Mel	5.11092e-05	TRUE	66		geneComp_00020029	ENSG00000206337.11	HCP5	Type_1	Type_2	3.09148e-07	66
geneComp_00006191	ENSG00000129990.15	SYT5	Naevi	Mel	5.36714e-05	TRUE	67		geneComp_00001840	ENSG00000089356.18	FXYD3	Type_1	Type_2	3.17601e-07	67
geneComp_00005235	ENSG00000122133.17	PAEP	Naevi	Mel	5.46538e-05	TRUE	68		geneComp_00004823	ENSG00000118520.15	ARG1	Type_1	Type_2	3.42944e-07	68
geneComp_00036242	ENSG00000246379.8	AC040168.1	Naevi	Mel	5.59232e-05	TRUE	69		geneComp_00001552	ENSG00000081923.14	ATP8B1	Type_1	Type_2	3.64664e-07	69
geneComp_00011870	ENSG00000166523.8	CLEC4E	Naevi	Mel	5.8711e-05	TRUE	70		geneComp_00004934	ENSG00000119673.14	ACOT2	Type_1	Type_2	4.8264e-07	70
geneComp_00001148	ENSG00000071189.21	SNX13	Naevi	Mel	6.19303e-05	TRUE	71		geneComp_00008010	ENSG00000140749.9	IGSF6	Type_1	Type_2	5.48246e-07	71
geneComp_00051514	ENSG00000276043.5	UHRF1	Naevi	Mel	6.62709e-05	TRUE	72		geneComp_00009980	ENSG00000156475.18	PPP2R2B	Type_1	Type_2	5.48246e-07	72
geneComp_00011030	ENSG00000163531.15	NFASC	Naevi	Mel	7.33912e-05	TRUE	73		geneComp_00004178	ENSG00000113389.16	NPR3	Type_1	Type_2	5.63592e-07	73
geneComp_00007664	ENSG00000138435.16	CHRNA1	Naevi	Mel	8.23137e-05	TRUE	74		geneComp_00019342	ENSG00000203896.10	LIME1	Type_1	Type_2	6.03366e-07	74
geneComp_00012855	ENSG00000170606.15	HSPA4	Naevi	Mel	8.8546e-05	TRUE	75		geneComp_00009362	ENSG00000151150.22	ANK3	Type_1	Type_2	6.52987e-07	75
geneComp_00012361	ENSG00000168490.14	PHYHIP	Naevi	Mel	0.00010366	TRUE	76		geneComp_00014495	ENSG00000178623.12	GPR35	Type_1	Type_2	6.87373e-07	76
geneComp_00042796	ENSG00000258636.2	AL121821.2	Naevi	Mel	0.00010366	TRUE	77		geneComp_00006436	ENSG00000131386.19	GALNT15	Type_1	Type_2	7.9643e-07	77
geneComp_00002804	ENSG00000103342.13	GSPT1	Naevi	Mel	0.000103854	TRUE	78		geneComp_00001592	ENSG00000083307.12	GRHL2	Type_1	Type_2	8.04591e-07	78
geneComp_00009732	ENSG00000154227.13	CERS3	Naevi	Mel	0.000108924	TRUE	79		geneComp_00011097	ENSG00000163704.12	PRRT3	Type_1	Type_2	8.13655e-07	79
geneComp_00009210	ENSG00000149489.8	ROM1	Naevi	Mel	0.000115976	TRUE	80		geneComp_00000377	ENSG00000017797.13	RALBP1	Type_1	Type_2	8.88795e-07	80
geneComp_00000287	ENSG00000011201.12	ANOS1	Naevi	Mel	0.000119785	TRUE	81		geneComp_00000177	ENSG00000007264.15	MATK	Type_1	Type_2	9.13201e-07	81
geneComp_00002407	ENSG00000100911.16	PSME2	Naevi	Mel	0.000119813	TRUE	82		geneComp_00000595	ENSG00000043039.7	BARX2	Type_1	Type_2	1.12004e-06	82
geneComp_00004907	ENSG00000119487.17	MAPKAP1	Naevi	Mel	0.000119813	TRUE	83		geneComp_00011391	ENSG00000164638.10	SLC29A4	Type_1	Type_2	1.18821e-06	83
geneComp_00011928	ENSG00000166803.13	PCLAF	Naevi	Mel	0.000119813	TRUE	84		geneComp_00010113	ENSG00000157613.11	CREB3L1	Type_1	Type_2	1.49221e-06	84
geneComp_00011993	ENSG00000167005.14	NUDT21	Naevi	Mel	0.000119813	TRUE	85		geneComp_00004528	ENSG00000116106.12	EPHA4	Type_1	Type_2	1.54137e-06	85
geneComp_00002667	ENSG00000102383.14	ZDHHC15	Naevi	Mel	0.000122126	TRUE	86		geneComp_00001207	ENSG00000072818.12	ACAP1	Type_1	Type_2	1.71601e-06	86
geneComp_00000294	ENSG00000011332.19	DPF1	Naevi	Mel	0.000128501	TRUE	87		geneComp_00003598	ENSG00000108839.12	ALOX12	Type_1	Type_2	1.72432e-06	87
geneComp_00015682	ENSG00000184347.14	SLIT3	Naevi	Mel	0.000156991	TRUE	88		geneComp_00019910	ENSG00000205744.10	DENND1C	Type_1	Type_2	1.91257e-06	88
geneComp_00012789	ENSG00000170348.9	TMED10	Naevi	Mel	0.00018518	TRUE	89		geneComp_00002005	ENSG00000094755.17	GABRP	Type_1	Type_2	2.13743e-06	89
geneComp_00003226	ENSG00000105967.16	TFEC	Naevi	Mel	0.000185642	TRUE	90		geneComp_00013329	ENSG00000172578.12	KLHL6	Type_1	Type_2	2.32044e-06	90
geneComp_00001833	ENSG00000089248.7	ERP29	Naevi	Mel	0.000196155	TRUE	91		geneComp_00002293	ENSG00000100385.14	IL2RB	Type_1	Type_2	2.39656e-06	91
geneComp_00017304	ENSG00000197182.14	MIRLET7BHG	Naevi	Mel	0.000196155	TRUE	92		geneComp_00000274	ENSG00000010818.10	HIVEP2	Type_1	Type_2	2.80365e-06	92
geneComp_00003312	ENSG00000106460.19	TMEM106B	Naevi	Mel	0.000201337	TRUE	93		geneComp_00005494	ENSG00000124243.17	BCAS4	Type_1	Type_2	3.052e-06	93
geneComp_00013261	ENSG00000172315.6	TP53RK	Naevi	Mel	0.000201514	TRUE	94		geneComp_00013779	ENSG00000174951.11	FUT1	Type_1	Type_2	3.12695e-06	94
geneComp_00002180	ENSG00000100077.15	GRK3	Naevi	Mel	0.000257978	TRUE	95		geneComp_00021924	ENSG00000213809.9	KLRK1	Type_1	Type_2	3.9006e-06	95
geneComp_00013150	ENSG00000171848.15	RRM2	Naevi	Mel	0.000258716	TRUE	96		geneComp_00008125	ENSG00000141526.16	SLC16A3	Type_1	Type_2	3.93713e-06	96
geneComp_00013772	ENSG00000174939.11	ASPHD1	Naevi	Mel	0.000273917	TRUE	97		geneComp_00020046	ENSG00000206538.9	VGLL3	Type_1	Type_2	3.98857e-06	97
geneComp_00047059	ENSG00000266964.5	FXYD1	Naevi	Mel	0.000274285	TRUE	98		geneComp_00010160	ENSG00000158023.10	WDR66	Type_1	Type_2	4.06241e-06	98
geneComp_00007293	ENSG00000136536.15	2020-03-07	Naevi	Mel	0.000282126	TRUE	99		geneComp_00006283	ENSG00000130545.16	CRB3	Type_1	Type_2	4.23672e-06	99
geneComp_00007642	ENSG00000138346.15	DNA2	Naevi	Mel	0.000302072	TRUE	100		geneComp_00010533	ENSG00000160856.21	FCRL3	Type_1	Type_2	4.23672e-06	100
geneComp_00008654	ENSG00000145107.15	TM4SF19	Naevi	Mel	0.000304963	TRUE	101		geneComp_00010194	ENSG00000158315.11	RHBDL2	Type_1	Type_2	4.4622e-06	101
geneComp_00048884	ENSG00000270816.6	LINC00221	Naevi	Mel	0.000307352	TRUE	102		geneComp_00006212	ENSG00000130164.13	LDLR	Type_1	Type_2	4.46969e-06	102
geneComp_00019850	ENSG00000205485.13	AC004980.1	Naevi	Mel	0.000337128	TRUE	103		geneComp_00007476	ENSG00000137496.18	IL18BP	Type_1	Type_2	4.52236e-06	103
geneComp_00001939	ENSG00000091651.9	ORC6	Naevi	Mel	0.000355529	TRUE	104		geneComp_00028518	ENSG00000230438.7	SERPINB9P1	Type_1	Type_2	4.52236e-06	104
geneComp_00039647	ENSG00000253490.5	LINC02099	Naevi	Mel	0.000355529	TRUE	105		geneComp_00006151	ENSG00000129521.14	EGLN3	Type_1	Type_2	4.57307e-06	105
geneComp_00000016	ENSG00000001626.15	CFTR	Naevi	Mel	0.000374291	TRUE	106		geneComp_00012177	ENSG00000167757.14	KLK11	Type_1	Type_2	4.7364e-06	106
geneComp_00005020	ENSG00000120217.14	CD274	Naevi	Mel	0.000384099	TRUE	107		geneComp_00004679	ENSG00000117215.15	PLA2G2D	Type_1	Type_2	4.90388e-06	107
geneComp_00022633	ENSG00000215861.6	AC245297.1	Naevi	Mel	0.00040906	TRUE	108		geneComp_00014843	ENSG00000180438.15	TPRXL	Type_1	Type_2	5.16498e-06	108
geneComp_00008274	ENSG00000142748.12	FCN3	Naevi	Mel	0.000410001	TRUE	109		geneComp_00001319	ENSG00000075651.16	PLD1	Type_1	Type_2	5.20352e-06	109
geneComp_00003715	ENSG00000109906.14	ZBTB16	Naevi	Mel	0.000415731	TRUE	110		geneComp_00011005	ENSG00000163472.19	TMEM79	Type_1	Type_2	5.43701e-06	110
geneComp_00019591	ENSG00000204611.7	ZNF616	Naevi	Mel	0.000424777	TRUE	111		geneComp_00004840	ENSG00000118729.11	CASQ2	Type_1	Type_2	5.48335e-06	111
geneComp_00009268	ENSG00000149948.13	HMGA2	Naevi	Mel	0.000443479	TRUE	112		geneComp_00000158	ENSG00000006747.15	SCIN	Type_1	Type_2	6.55139e-06	112
geneComp_00003356	ENSG00000106714.17	CNTNAP3	Naevi	Mel	0.000448362	TRUE	113		geneComp_00009424	ENSG00000151632.17	AKR1C2	Type_1	Type_2	6.55139e-06	113
geneComp_00003172	ENSG00000105697.9	HAMP	Naevi	Mel	0.000462599	TRUE	114		geneComp_00012810	ENSG00000170425.3	ADORA2B	Type_1	Type_2	6.55139e-06	114
geneComp_00020926	ENSG00000211448.12	DIO2	Naevi	Mel	0.000470105	TRUE	115		geneComp_00000370	ENSG00000016402.13	IL20RA	Type_1	Type_2	7.15721e-06	115
geneComp_00010198	ENSG00000158402.20	CDC25C	Naevi	Mel	0.000483769	TRUE	116		geneComp_00005887	ENSG00000127124.16	HIVEP3	Type_1	Type_2	8.26201e-06	116
geneComp_00003911	ENSG00000111605.18	CPSF6	Naevi	Mel	0.000484175	TRUE	117		geneComp_00006132	ENSG00000129354.11	AP1M2	Type_1	Type_2	8.80989e-06	117
geneComp_00045630	ENSG00000263528.8	IKBKE	Naevi	Mel	0.000488868	TRUE	118		geneComp_00010745	ENSG00000162526.7	TSSK3	Type_1	Type_2	9.64186e-06	118
geneComp_00001556	ENSG00000082074.18	FYB1	Naevi	Mel	0.000500596	TRUE	119		geneComp_00008119	ENSG00000141505.12	ASGR1	Type_1	Type_2	9.86183e-06	119
geneComp_00008275	ENSG00000142751.15	GPN2	Naevi	Mel	0.000527671	TRUE	120		geneComp_00013150	ENSG00000171848.15	RRM2	Type_1	Type_2	1.06199e-05	120
geneComp_00011042	ENSG00000163568.15	AIM2	Naevi	Mel	0.000535941	TRUE	121		geneComp_00051514	ENSG00000276043.5	UHRF1	Type_1	Type_2	1.12548e-05	121
geneComp_00024000	ENSG00000223573.7	TINCR	Naevi	Mel	0.000572632	TRUE	122		geneComp_00014002	ENSG00000176153.12	GPX2	Type_1	Type_2	1.13369e-05	122
geneComp_00009565	ENSG00000152700.14	SAR1B	Naevi	Mel	0.000576387	TRUE	123		geneComp_00015104	ENSG00000181938.13	GINS3	Type_1	Type_2	1.15719e-05	123
geneComp_00004436	ENSG00000115486.12	GGCX	Naevi	Mel	0.000640447	TRUE	124		geneComp_00011090	ENSG00000163687.14	DNASE1L3	Type_1	Type_2	1.31738e-05	124
geneComp_00014672	ENSG00000179528.16	LBX2	Naevi	Mel	0.000691692	TRUE	125		geneComp_00019600	ENSG00000204623.9	ZNRD1ASP	Type_1	Type_2	1.38701e-05	125
geneComp_00002999	ENSG00000104901.7	DKKL1	Naevi	Mel	0.00069999	TRUE	126		geneComp_00001239	ENSG00000073737.16	DHRS9	Type_1	Type_2	1.40561e-05	126
geneComp_00035020	ENSG00000242076.2	IGKV1-33	Naevi	Mel	0.000704401	TRUE	127		geneComp_00006742	ENSG00000133315.11	MACROD1	Type_1	Type_2	1.42114e-05	127
geneComp_00005042	ENSG00000120333.4	MRPS14	Naevi	Mel	0.000708215	TRUE	128		geneComp_00001452	ENSG00000079156.17	OSBPL6	Type_1	Type_2	1.59593e-05	128
geneComp_00010533	ENSG00000160856.21	FCRL3	Naevi	Mel	0.000708215	TRUE	129		geneComp_00012261	ENSG00000168062.10	BATF2	Type_1	Type_2	1.65555e-05	129
geneComp_00015434	ENSG00000183336.8	BOLA2	Naevi	Mel	0.000727645	TRUE	130		geneComp_00001767	ENSG00000088280.19	ASAP3	Type_1	Type_2	1.65603e-05	130
geneComp_00016543	ENSG00000187942.12	LDLRAD2	Naevi	Mel	0.000730343	TRUE	131		geneComp_00024122	ENSG00000223756.6	TSSC2	Type_1	Type_2	1.70894e-05	131
geneComp_00006583	ENSG00000132434.9	LANCL2	Naevi	Mel	0.000786854	TRUE	132		geneComp_00006112	ENSG00000129194.8	SOX15	Type_1	Type_2	1.84558e-05	132
geneComp_00012686	ENSG00000169891.18	REPS2	Naevi	Mel	0.000821302	TRUE	133		geneComp_00016688	ENSG00000188511.12	C22orf34	Type_1	Type_2	1.84851e-05	133
geneComp_00000729	ENSG00000054392.13	HHAT	Naevi	Mel	0.000834512	TRUE	134		geneComp_00022145	ENSG00000214313.8	AZGP1P1	Type_1	Type_2	1.95086e-05	134
geneComp_00007046	ENSG00000135318.12	NT5E	Naevi	Mel	0.00088281	TRUE	135		geneComp_00012730	ENSG00000170085.18	SIMC1	Type_1	Type_2	1.96369e-05	135
geneComp_00001214	ENSG00000072954.7	TMEM38A	Naevi	Mel	0.000886958	TRUE	136		geneComp_00017150	ENSG00000196684.12	HSH2D	Type_1	Type_2	2.01192e-05	136
geneComp_00001485	ENSG00000080031.10	PTPRH	Naevi	Mel	0.000913671	TRUE	137		geneComp_00004799	ENSG00000118322.14	ATP10B	Type_1	Type_2	2.14583e-05	137
geneComp_00007304	ENSG00000136634.7	IL10	Naevi	Mel	0.000915445	TRUE	138		geneComp_00017438	ENSG00000197614.11	MFAP5	Type_1	Type_2	2.3662e-05	138
geneComp_00004442	ENSG00000115523.16	GNLY	Naevi	Mel	0.000922184	TRUE	139		geneComp_00005882	ENSG00000127074.14	RGS13	Type_1	Type_2	2.42071e-05	139
geneComp_00016015	ENSG00000185697.16	MYBL1	Naevi	Mel	0.00096824	TRUE	140		geneComp_00048216	ENSG00000269404.7	SPIB	Type_1	Type_2	2.62308e-05	140
geneComp_00007918	ENSG00000140105.18	WARS	Naevi	Mel	0.00105589	TRUE	141		geneComp_00010280	ENSG00000159023.21	EPB41	Type_1	Type_2	2.78088e-05	141
geneComp_00012870	ENSG00000170677.6	SOCS6	Naevi	Mel	0.00110132	TRUE	142		geneComp_00016396	ENSG00000187239.17	FNBP1	Type_1	Type_2	2.8222e-05	142
geneComp_00005759	ENSG00000125931.11	CITED1	Naevi	Mel	0.00112994	TRUE	143		geneComp_00011040	ENSG00000163564.15	PYHIN1	Type_1	Type_2	2.8737e-05	143
geneComp_00004496	ENSG00000115884.11	SDC1	Naevi	Mel	0.00113059	TRUE	144		geneComp_00003306	ENSG00000106404.13	CLDN15	Type_1	Type_2	2.91564e-05	144
geneComp_00013271	ENSG00000172345.14	STARD5	Naevi	Mel	0.00114126	TRUE	145		geneComp_00000903	ENSG00000064886.14	CHI3L2	Type_1	Type_2	2.95001e-05	145
geneComp_00001413	ENSG00000078140.14	UBE2K	Naevi	Mel	0.00117896	TRUE	146		geneComp_00034081	ENSG00000239704.11	CDRT4	Type_1	Type_2	3.00581e-05	146
geneComp_00019921	ENSG00000205777.17	GAGE1	Naevi	Mel	0.00121317	TRUE	147		geneComp_00013697	ENSG00000174514.13	MFSD4A	Type_1	Type_2	3.07521e-05	147
geneComp_00016159	ENSG00000186204.15	CYP4F12	Naevi	Mel	0.00121353	TRUE	148		geneComp_00001101	ENSG00000070159.14	PTPN3	Type_1	Type_2	3.19584e-05	148
geneComp_00048062	ENSG00000268916.6	CSAG3	Naevi	Mel	0.00123411	TRUE	149		geneComp_00012159	ENSG00000167701.14	GPT	Type_1	Type_2	3.27931e-05	149
geneComp_00004353	ENSG00000115009.13	CCL20	Naevi	Mel	0.00129293	TRUE	150		geneComp_00006476	ENSG00000131686.15	CA6	Type_1	Type_2	3.41259e-05	150
geneComp_00002074	ENSG00000097033.14	SH3GLB1	Naevi	Mel	0.00130261	TRUE	151		geneComp_00006414	ENSG00000131187.9	F12	Type_1	Type_2	3.79047e-05	151
geneComp_00019297	ENSG00000203747.11	FCGR3A	Naevi	Mel	0.00138581	TRUE	152		geneComp_00003887	ENSG00000111344.11	RASAL1	Type_1	Type_2	3.85363e-05	152
geneComp_00000777	ENSG00000057663.16	ATG5	Naevi	Mel	0.00139057	TRUE	153		geneComp_00007471	ENSG00000137478.15	FCHSD2	Type_1	Type_2	3.87785e-05	153
geneComp_00004297	ENSG00000114529.12	C3orf52	Naevi	Mel	0.0014047	TRUE	154		geneComp_00028218	ENSG00000230006.7	ANKRD36BP2	Type_1	Type_2	4.04963e-05	154
geneComp_00001957	ENSG00000092068.20	SLC7A8	Naevi	Mel	0.00143497	TRUE	155		geneComp_00038149	ENSG00000251002.8	AC244502.1	Type_1	Type_2	4.04963e-05	155
geneComp_00004129	ENSG00000112984.12	KIF20A	Naevi	Mel	0.00148978	TRUE	156		geneComp_00012954	ENSG00000171051.8	FPR1	Type_1	Type_2	4.0649e-05	156
geneComp_00003988	ENSG00000112029.10	FBXO5	Naevi	Mel	0.00156458	TRUE	157		geneComp_00009750	ENSG00000154330.13	PGM5	Type_1	Type_2	4.38283e-05	157
geneComp_00014274	ENSG00000177455.14	CD19	Naevi	Mel	0.00156957	TRUE	158		geneComp_00007551	ENSG00000137857.17	DUOX1	Type_1	Type_2	4.49667e-05	158
geneComp_00005862	ENSG00000126856.14	PRDM7	Naevi	Mel	0.00160706	TRUE	159		geneComp_00005632	ENSG00000125354.23	SEPTIN6	Type_1	Type_2	4.52254e-05	159
geneComp_00002163	ENSG00000100027.16	YPEL1	Naevi	Mel	0.00160752	TRUE	160		geneComp_00008673	ENSG00000145287.10	PLAC8	Type_1	Type_2	4.60111e-05	160
geneComp_00006559	ENSG00000132313.15	MRPL35	Naevi	Mel	0.0016953	TRUE	161		geneComp_00009343	ENSG00000151006.7	PRSS53	Type_1	Type_2	4.6126e-05	161
geneComp_00009435	ENSG00000151693.11	ASAP2	Naevi	Mel	0.00175522	TRUE	162		geneComp_00006915	ENSG00000134533.6	RERG	Type_1	Type_2	4.95576e-05	162
geneComp_00007958	ENSG00000140416.21	TPM1	Naevi	Mel	0.00176082	TRUE	163		geneComp_00017308	ENSG00000197208.6	SLC22A4	Type_1	Type_2	5.35103e-05	163
geneComp_00030543	ENSG00000233539.5	AC011294.1	Naevi	Mel	0.00180774	TRUE	164		geneComp_00001419	ENSG00000078295.17	ADCY2	Type_1	Type_2	5.4732e-05	164
geneComp_00050003	ENSG00000272870.3	AC097534.2	Naevi	Mel	0.00182583	TRUE	165		geneComp_00007501	ENSG00000137673.9	MMP7	Type_1	Type_2	5.73473e-05	165
geneComp_00043393	ENSG00000259332.3	ST20-MTHFS	Naevi	Mel	0.00192122	TRUE	166		geneComp_00008349	ENSG00000143297.19	FCRL5	Type_1	Type_2	5.97631e-05	166
geneComp_00051973	ENSG00000277089.4	AC243829.4	Naevi	Mel	0.00195913	TRUE	167		geneComp_00000940	ENSG00000065613.15	SLK	Type_1	Type_2	5.97827e-05	167
geneComp_00017922	ENSG00000198959.12	TGM2	Naevi	Mel	0.00196978	TRUE	168		geneComp_00031157	ENSG00000234465.11	PINLYP	Type_1	Type_2	6.22615e-05	168
geneComp_00038150	ENSG00000251003.9	ZFPM2-AS1	Naevi	Mel	0.00197402	TRUE	169		geneComp_00006242	ENSG00000130307.12	USHBP1	Type_1	Type_2	6.43415e-05	169
geneComp_00004662	ENSG00000117069.15	ST6GALNAC5	Naevi	Mel	0.00197613	TRUE	170		geneComp_00004984	ENSG00000119943.13	PYROXD2	Type_1	Type_2	6.49734e-05	170
geneComp_00002375	ENSG00000100721.11	TCL1A	Naevi	Mel	0.00198038	TRUE	171		geneComp_00006917	ENSG00000134539.17	KLRD1	Type_1	Type_2	6.59429e-05	171
geneComp_00005729	ENSG00000125835.18	SNRPB	Naevi	Mel	0.00198038	TRUE	172		geneComp_00010095	ENSG00000157456.8	CCNB2	Type_1	Type_2	6.70676e-05	172
geneComp_00000442	ENSG00000024526.17	DEPDC1	Naevi	Mel	0.00198081	TRUE	173		geneComp_00012658	ENSG00000169758.13	TMEM266	Type_1	Type_2	6.7373e-05	173
geneComp_00016710	ENSG00000188610.12	FAM72B	Naevi	Mel	0.00198527	TRUE	174		geneComp_00041292	ENSG00000255501.3	CARD18	Type_1	Type_2	7.05408e-05	174
geneComp_00033439	ENSG00000237949.2	LINC00844	Naevi	Mel	0.00208443	TRUE	175		geneComp_00008934	ENSG00000147168.12	IL2RG	Type_1	Type_2	7.09469e-05	175
geneComp_00010120	ENSG00000157680.15	DGKI	Naevi	Mel	0.00209585	TRUE	176		geneComp_00000904	ENSG00000064932.16	SBNO2	Type_1	Type_2	7.15009e-05	176
geneComp_00036156	ENSG00000245293.3	AC096564.1	Naevi	Mel	0.00228519	TRUE	177		geneComp_00000258	ENSG00000010310.9	GIPR	Type_1	Type_2	7.29082e-05	177
geneComp_00013738	ENSG00000174775.17	HRAS	Naevi	Mel	0.00247552	TRUE	178		geneComp_00049044	ENSG00000271109.2	AC008555.4	Type_1	Type_2	7.46314e-05	178
geneComp_00000182	ENSG00000007350.17	TKTL1	Naevi	Mel	0.00247859	TRUE	179		geneComp_00015907	ENSG00000185261.14	KIAA0825	Type_1	Type_2	7.50795e-05	179
geneComp_00011908	ENSG00000166716.10	ZNF592	Naevi	Mel	0.00251846	TRUE	180		geneComp_00017307	ENSG00000197191.6	CYSRT1	Type_1	Type_2	7.94687e-05	180
geneComp_00000179	ENSG00000007312.12	CD79B	Naevi	Mel	0.00253092	TRUE	181		geneComp_00017551	ENSG00000197971.15	MBP	Type_1	Type_2	8.10044e-05	181
geneComp_00006543	ENSG00000132185.16	FCRLA	Naevi	Mel	0.00261409	TRUE	182		geneComp_00047723	ENSG00000267795.6	SMIM22	Type_1	Type_2	8.50776e-05	182
geneComp_00013054	ENSG00000171467.16	ZNF318	Naevi	Mel	0.00273918	TRUE	183		geneComp_00025041	ENSG00000225151.10	GOLGA2P7	Type_1	Type_2	8.84923e-05	183
geneComp_00022369	ENSG00000214967.5	NPIPA7	Naevi	Mel	0.00273918	TRUE	184		geneComp_00013936	ENSG00000175779.4	LINC02694	Type_1	Type_2	0.000102231	184
geneComp_00002860	ENSG00000103888.17	CEMIP	Naevi	Mel	0.00274983	TRUE	185		geneComp_00013819	ENSG00000175170.16	FAM182B	Type_1	Type_2	0.000108909	185
geneComp_00037054	ENSG00000249249.2	AC010226.1	Naevi	Mel	0.00277322	TRUE	186		geneComp_00012346	ENSG00000168421.13	RHOH	Type_1	Type_2	0.000112343	186
geneComp_00013671	ENSG00000174405.13	LIG4	Naevi	Mel	0.00287024	TRUE	187		geneComp_00036930	ENSG00000249042.6	AC008771.1	Type_1	Type_2	0.000115718	187
geneComp_00014794	ENSG00000180198.16	RCC1	Naevi	Mel	0.0029447	TRUE	188		geneComp_00042653	ENSG00000258461.5	AC012651.1	Type_1	Type_2	0.000117103	188
geneComp_00006935	ENSG00000134668.12	SPOCD1	Naevi	Mel	0.00296258	TRUE	189		geneComp_00029159	ENSG00000231407.6	GORAB-AS1	Type_1	Type_2	0.000129438	189
geneComp_00050203	ENSG00000273225.4	FAM25BP	Naevi	Mel	0.00297133	TRUE	190		geneComp_00001775	ENSG00000088386.17	SLC15A1	Type_1	Type_2	0.000139305	190
geneComp_00019873	ENSG00000205592.14	MUC19	Naevi	Mel	0.00298129	TRUE	191		geneComp_00010198	ENSG00000158402.20	CDC25C	Type_1	Type_2	0.00014329	191
geneComp_00017007	ENSG00000196275.14	GTF2IRD2	Naevi	Mel	0.00301283	TRUE	192		geneComp_00006167	ENSG00000129675.16	ARHGEF6	Type_1	Type_2	0.00015001	192
geneComp_00013273	ENSG00000172348.14	RCAN2	Naevi	Mel	0.00301438	TRUE	193		geneComp_00030175	ENSG00000232977.7	LINC00327	Type_1	Type_2	0.000151682	193
geneComp_00013490	ENSG00000173376.14	NDNF	Naevi	Mel	0.00303118	TRUE	194		geneComp_00012090	ENSG00000167483.18	NIBAN3	Type_1	Type_2	0.000153705	194
geneComp_00017175	ENSG00000196776.16	CD47	Naevi	Mel	0.00305278	TRUE	195		geneComp_00013271	ENSG00000172345.14	STARD5	Type_1	Type_2	0.000155362	195
geneComp_00005591	ENSG00000124813.23	RUNX2	Naevi	Mel	0.0030815	TRUE	196		geneComp_00002073	ENSG00000097021.19	ACOT7	Type_1	Type_2	0.000157437	196
geneComp_00001662	ENSG00000085514.16	PILRA	Naevi	Mel	0.00312508	TRUE	197		geneComp_00010400	ENSG00000160013.9	PTGIR	Type_1	Type_2	0.000168805	197
geneComp_00000275	ENSG00000010932.17	FMO1	Naevi	Mel	0.0031746	TRUE	198		geneComp_00016515	ENSG00000187815.10	ZFP69	Type_1	Type_2	0.000171283	198
geneComp_00004414	ENSG00000115361.8	ACADL	Naevi	Mel	0.00322989	TRUE	199		geneComp_00005591	ENSG00000124813.23	RUNX2	Type_1	Type_2	0.000172335	199
geneComp_00014636	ENSG00000179314.14	WSCD1	Naevi	Mel	0.00324013	TRUE	200		geneComp_00004843	ENSG00000118777.12	ABCG2	Type_1	Type_2	0.000174271	200
geneComp_00001444	ENSG00000078900.15	TP73	Naevi	Mel	0.00325657	TRUE	201		geneComp_00002375	ENSG00000100721.11	TCL1A	Type_1	Type_2	0.000175285	201
geneComp_00038471	ENSG00000251493.5	FOXD1	Naevi	Mel	0.0033039	TRUE	202		geneComp_00013022	ENSG00000171320.15	ESCO2	Type_1	Type_2	0.000184395	202
geneComp_00041689	ENSG00000256422.6	LINC02552	Naevi	Mel	0.00333699	TRUE	203		geneComp_00043229	ENSG00000259129.6	LINC00648	Type_1	Type_2	0.000188608	203
geneComp_00007818	ENSG00000139410.15	SDSL	Naevi	Mel	0.00334372	TRUE	204		geneComp_00028815	ENSG00000230866.2	LINC02558	Type_1	Type_2	0.000189785	204
geneComp_00006038	ENSG00000128585.18	MKLN1	Naevi	Mel	0.00361425	TRUE	205		geneComp_00006918	ENSG00000134545.13	KLRC1	Type_1	Type_2	0.000190814	205
geneComp_00004844	ENSG00000118785.14	SPP1	Naevi	Mel	0.00363742	TRUE	206		geneComp_00013052	ENSG00000171462.15	DLK2	Type_1	Type_2	0.000193327	206
geneComp_00001514	ENSG00000080854.15	IGSF9B	Naevi	Mel	0.00365501	TRUE	207		geneComp_00006267	ENSG00000130475.14	FCHO1	Type_1	Type_2	0.000193984	207
geneComp_00004080	ENSG00000112576.12	CCND3	Naevi	Mel	0.00368358	TRUE	208		geneComp_00002860	ENSG00000103888.17	CEMIP	Type_1	Type_2	0.000206906	208
geneComp_00010311	ENSG00000159217.10	IGF2BP1	Naevi	Mel	0.00375959	TRUE	209		geneComp_00004372	ENSG00000115163.15	CENPA	Type_1	Type_2	0.000208516	209
geneComp_00011379	ENSG00000164604.12	GPR85	Naevi	Mel	0.00375959	TRUE	210		geneComp_00007571	ENSG00000137962.13	ARHGAP29	Type_1	Type_2	0.000208526	210
geneComp_00013068	ENSG00000171497.5	PPID	Naevi	Mel	0.00382674	TRUE	211		geneComp_00016159	ENSG00000186204.15	CYP4F12	Type_1	Type_2	0.000212647	211
geneComp_00049772	ENSG00000272449.2	AL139246.5	Naevi	Mel	0.00383946	TRUE	212		geneComp_00038171	ENSG00000251034.2	AC087854.1	Type_1	Type_2	0.00021664	212
geneComp_00015240	ENSG00000182534.13	MXRA7	Naevi	Mel	0.00384609	TRUE	213		geneComp_00002407	ENSG00000100911.16	PSME2	Type_1	Type_2	0.000241324	213
geneComp_00005954	ENSG00000127863.15	TNFRSF19	Naevi	Mel	0.00388764	TRUE	214		geneComp_00010650	ENSG00000161958.11	FGF11	Type_1	Type_2	0.000242449	214
geneComp_00046129	ENSG00000264672.6	SEPTIN4-AS1	Naevi	Mel	0.00408507	TRUE	215		geneComp_00004523	ENSG00000116039.13	ATP6V1B1	Type_1	Type_2	0.000243482	215
geneComp_00012818	ENSG00000170456.16	DENND5B	Naevi	Mel	0.00410062	TRUE	216		geneComp_00008404	ENSG00000143494.15	VASH2	Type_1	Type_2	0.00025284	216
geneComp_00015874	ENSG00000185129.7	PURA	Naevi	Mel	0.00413791	TRUE	217		geneComp_00006759	ENSG00000133477.17	FAM83F	Type_1	Type_2	0.000254856	217
geneComp_00006158	ENSG00000129595.13	EPB41L4A	Naevi	Mel	0.0041662	TRUE	218		geneComp_00036686	ENSG00000248643.5	RBM14-RBM4	Type_1	Type_2	0.000256111	218
geneComp_00012000	ENSG00000167074.15	TEF	Naevi	Mel	0.00419164	TRUE	219		geneComp_00000416	ENSG00000022267.19	FHL1	Type_1	Type_2	0.00025626	219
geneComp_00001197	ENSG00000072571.20	HMMR	Naevi	Mel	0.0044117	TRUE	220		geneComp_00013100	ENSG00000171631.14	P2RY6	Type_1	Type_2	0.000256951	220
geneComp_00014486	ENSG00000178585.15	CTNNBIP1	Naevi	Mel	0.0044254	TRUE	221		geneComp_00004416	ENSG00000115364.14	MRPL19	Type_1	Type_2	0.000259005	221
geneComp_00053709	ENSG00000283580.3	AC098484.3	Naevi	Mel	0.00444595	TRUE	222		geneComp_00044662	ENSG00000261064.1	LINC02256	Type_1	Type_2	0.000264562	222
geneComp_00001071	ENSG00000069275.13	NUCKS1	Naevi	Mel	0.00447974	TRUE	223		geneComp_00010744	ENSG00000162522.11	KIAA1522	Type_1	Type_2	0.000290371	223
geneComp_00047222	ENSG00000267169.2	AC022098.1	Naevi	Mel	0.00455282	TRUE	224		geneComp_00006542	ENSG00000132182.12	NUP210	Type_1	Type_2	0.000291351	224
geneComp_00002391	ENSG00000100815.12	TRIP11	Naevi	Mel	0.00458929	TRUE	225		geneComp_00017119	ENSG00000196588.17	MRTFA	Type_1	Type_2	0.000291915	225
geneComp_00002209	ENSG00000100162.15	CENPM	Naevi	Mel	0.00462297	TRUE	226		geneComp_00002993	ENSG00000104888.10	SLC17A7	Type_1	Type_2	0.000294895	226
geneComp_00051527	ENSG00000276075.1	AC027682.6	Naevi	Mel	0.00462297	TRUE	227		geneComp_00015493	ENSG00000183604.14	SMG1P5	Type_1	Type_2	0.000298025	227
geneComp_00005059	ENSG00000120526.11	NUDCD1	Naevi	Mel	0.00469433	TRUE	228		geneComp_00002242	ENSG00000100276.10	RASL10A	Type_1	Type_2	0.000308031	228
geneComp_00012823	ENSG00000170469.10	SPATA24	Naevi	Mel	0.00483069	TRUE	229		geneComp_00033884	ENSG00000239213.6	NCK1-DT	Type_1	Type_2	0.000338498	229
geneComp_00019786	ENSG00000205221.12	VIT	Naevi	Mel	0.00484619	TRUE	230		geneComp_00042665	ENSG00000258476.6	LINC02207	Type_1	Type_2	0.000342612	230
geneComp_00006450	ENSG00000131470.14	PSMC3IP	Naevi	Mel	0.00487474	TRUE	231		geneComp_00006520	ENSG00000131979.19	GCH1	Type_1	Type_2	0.000352089	231
geneComp_00017796	ENSG00000198734.11	F5	Naevi	Mel	0.00495542	TRUE	232		geneComp_00001321	ENSG00000075702.18	WDR62	Type_1	Type_2	0.000360217	232
geneComp_00003731	ENSG00000110031.12	LPXN	Naevi	Mel	0.00513373	TRUE	233		geneComp_00030426	ENSG00000233369.7	GTF2IP4	Type_1	Type_2	0.00037531	233
geneComp_00004810	ENSG00000118473.22	SGIP1	Naevi	Mel	0.00513515	TRUE	234		geneComp_00008112	ENSG00000141469.18	SLC14A1	Type_1	Type_2	0.000382568	234
geneComp_00011214	ENSG00000164066.13	INTU	Naevi	Mel	0.00553516	TRUE	235		geneComp_00003084	ENSG00000105357.17	MYH14	Type_1	Type_2	0.000388327	235
geneComp_00002677	ENSG00000102466.15	FGF14	Naevi	Mel	0.00559849	TRUE	236		geneComp_00037370	ENSG00000249790.3	AC092490.1	Type_1	Type_2	0.000414567	236
geneComp_00005075	ENSG00000120675.6	DNAJC15	Naevi	Mel	0.00577858	TRUE	237		geneComp_00012696	ENSG00000169914.6	OTUD3	Type_1	Type_2	0.00042529	237
geneComp_00012298	ENSG00000168243.11	GNG4	Naevi	Mel	0.00579958	TRUE	238		geneComp_00004104	ENSG00000112761.20	CCN6	Type_1	Type_2	0.000430518	238
geneComp_00026914	ENSG00000228010.6	AC073343.2	Naevi	Mel	0.00594721	TRUE	239		geneComp_00015223	ENSG00000182472.9	CAPN12	Type_1	Type_2	0.000455603	239
geneComp_00003723	ENSG00000109944.10	JHY	Naevi	Mel	0.00600331	TRUE	240		geneComp_00010758	ENSG00000162595.7	DIRAS3	Type_1	Type_2	0.000459242	240
geneComp_00014894	ENSG00000180769.10	WDFY3-AS2	Naevi	Mel	0.00611036	TRUE	241		geneComp_00007500	ENSG00000137672.13	TRPC6	Type_1	Type_2	0.000459997	241
geneComp_00016527	ENSG00000187860.10	CCDC157	Naevi	Mel	0.0065508	TRUE	242		geneComp_00004442	ENSG00000115523.16	GNLY	Type_1	Type_2	0.000464104	242
geneComp_00016023	ENSG00000185736.16	ADARB2	Naevi	Mel	0.00690757	TRUE	243		geneComp_00007901	ENSG00000139988.10	RDH12	Type_1	Type_2	0.000465089	243
geneComp_00014578	ENSG00000179044.16	EXOC3L1	Naevi	Mel	0.0070549	TRUE	244		geneComp_00000645	ENSG00000048540.15	LMO3	Type_1	Type_2	0.000470983	244
geneComp_00014116	ENSG00000176732.7	PFN4	Naevi	Mel	0.00722867	TRUE	245		geneComp_00011842	ENSG00000166432.15	ZMAT1	Type_1	Type_2	0.000482253	245
geneComp_00006847	ENSG00000134201.12	GSTM5	Naevi	Mel	0.00737239	TRUE	246		geneComp_00002870	ENSG00000104055.16	TGM5	Type_1	Type_2	0.000515852	246
geneComp_00051019	ENSG00000274956.2	NKAIN3-IT1	Naevi	Mel	0.0074176	TRUE	247		geneComp_00013905	ENSG00000175600.15	SUGCT	Type_1	Type_2	0.000516501	247
geneComp_00043474	ENSG00000259426.6	AC027237.3	Naevi	Mel	0.00742909	TRUE	248		geneComp_00016296	ENSG00000186818.12	LILRB4	Type_1	Type_2	0.000527257	248
geneComp_00004082	ENSG00000112584.13	FAM120B	Naevi	Mel	0.00746238	TRUE	249		geneComp_00034195	ENSG00000239998.6	LILRA2	Type_1	Type_2	0.000566277	249
geneComp_00008975	ENSG00000147481.17	SNTG1	Naevi	Mel	0.00814065	TRUE	250		geneComp_00030032	ENSG00000232774.8	AL355916.1	Type_1	Type_2	0.000598879	250
geneComp_00051532	ENSG00000276085.1	CCL3L1	Naevi	Mel	0.00817066	TRUE	251		geneComp_00015960	ENSG00000185482.8	STAC3	Type_1	Type_2	0.000620576	251
geneComp_00036845	ENSG00000248905.9	FMN1	Naevi	Mel	0.00818478	TRUE	252		geneComp_00046129	ENSG00000264672.6	SEPTIN4-AS1	Type_1	Type_2	0.000636791	252
geneComp_00031301	ENSG00000234690.7	EPCAM-DT	Naevi	Mel	0.00821821	TRUE	253		geneComp_00013892	ENSG00000175544.13	CABP4	Type_1	Type_2	0.000638093	253
geneComp_00012850	ENSG00000170579.17	DLGAP1	Naevi	Mel	0.00833836	TRUE	254		geneComp_00005895	ENSG00000127249.15	ATP13A4	Type_1	Type_2	0.00066669	254
geneComp_00007006	ENSG00000135083.15	CCNJL	Naevi	Mel	0.00930168	TRUE	255		geneComp_00041730	ENSG00000256546.2	AC156455.1	Type_1	Type_2	0.000670421	255
geneComp_00032167	ENSG00000236013.7	AL357146.1	Naevi	Mel	0.00963323	TRUE	256		geneComp_00036882	ENSG00000248964.7	AC131254.1	Type_1	Type_2	0.000690987	256
geneComp_00021996	ENSG00000213967.11	ZNF726	Naevi	Mel	0.00967042	TRUE	257		geneComp_00009449	ENSG00000151779.13	NBAS	Type_1	Type_2	0.000691482	257
geneComp_00054033	ENSG00000284606.1	AC105233.5	Naevi	Mel	0.00974738	TRUE	258		geneComp_00001185	ENSG00000072201.14	LNX1	Type_1	Type_2	0.000702712	258
geneComp_00005065	ENSG00000120594.17	PLXDC2	Naevi	Mel	0.00998091	TRUE	259		geneComp_00004655	ENSG00000117009.12	KMO	Type_1	Type_2	0.00070352	259
geneComp_00011332	ENSG00000164398.14	ACSL6	Naevi	Mel	0.0101713	TRUE	260		geneComp_00009475	ENSG00000152049.6	KCNE4	Type_1	Type_2	0.000708099	260
geneComp_00011052	ENSG00000163600.12	ICOS	Naevi	Mel	0.0102249	TRUE	261		geneComp_00007818	ENSG00000139410.15	SDSL	Type_1	Type_2	0.000708395	261
geneComp_00012954	ENSG00000171051.8	FPR1	Naevi	Mel	0.0104683	TRUE	262		geneComp_00005395	ENSG00000123545.6	NDUFAF4	Type_1	Type_2	0.000725439	262
geneComp_00015689	ENSG00000184368.16	MAP7D2	Naevi	Mel	0.0106664	TRUE	263		geneComp_00014169	ENSG00000176946.12	THAP4	Type_1	Type_2	0.000725439	263
geneComp_00005646	ENSG00000125434.11	SLC25A35	Naevi	Mel	0.0116933	TRUE	264		geneComp_00011512	ENSG00000165105.10	RASEF	Type_1	Type_2	0.000771827	264
geneComp_00002868	ENSG00000104044.16	OCA2	Naevi	Mel	0.0119835	TRUE	265		geneComp_00012211	ENSG00000167880.7	EVPL	Type_1	Type_2	0.000771827	265
geneComp_00005110	ENSG00000120899.18	PTK2B	Naevi	Mel	0.0121246	TRUE	266		geneComp_00000871	ENSG00000064042.18	LIMCH1	Type_1	Type_2	0.000800517	266
geneComp_00016776	ENSG00000188820.13	CALHM6	Naevi	Mel	0.0121542	TRUE	267		geneComp_00017391	ENSG00000197471.12	SPN	Type_1	Type_2	0.000805974	267
geneComp_00003148	ENSG00000105619.13	TFPT	Naevi	Mel	0.0128005	TRUE	268		geneComp_00004068	ENSG00000112486.16	CCR6	Type_1	Type_2	0.000824913	268
geneComp_00006033	ENSG00000128564.7	VGF	Naevi	Mel	0.0133726	TRUE	269		geneComp_00005998	ENSG00000128268.12	MGAT3	Type_1	Type_2	0.000836161	269
geneComp_00015348	ENSG00000182993.5	C12orf60	Naevi	Mel	0.0136334	TRUE	270		geneComp_00003036	ENSG00000105131.8	EPHX3	Type_1	Type_2	0.000843044	270
geneComp_00004124	ENSG00000112964.14	GHR	Naevi	Mel	0.0136898	TRUE	271		geneComp_00001833	ENSG00000089248.7	ERP29	Type_1	Type_2	0.000867416	271
geneComp_00017366	ENSG00000197405.8	C5AR1	Naevi	Mel	0.0137359	TRUE	272		geneComp_00013555	ENSG00000173698.18	ADGRG2	Type_1	Type_2	0.000909112	272
geneComp_00040685	ENSG00000254788.7	CKLF-CMTM1	Naevi	Mel	0.0137419	TRUE	273		geneComp_00005242	ENSG00000122194.18	PLG	Type_1	Type_2	0.000943302	273
geneComp_00009813	ENSG00000154920.14	EME1	Naevi	Mel	0.0138877	TRUE	274		geneComp_00000772	ENSG00000057294.14	PKP2	Type_1	Type_2	0.000947259	274
geneComp_00030270	ENSG00000233117.4	LINC00702	Naevi	Mel	0.0142795	TRUE	275		geneComp_00043553	ENSG00000259520.6	AC051619.5	Type_1	Type_2	0.00101858	275
geneComp_00007408	ENSG00000137101.12	CD72	Naevi	Mel	0.0142917	TRUE	276		geneComp_00008854	ENSG00000146555.19	SDK1	Type_1	Type_2	0.00102503	276
geneComp_00012639	ENSG00000169684.13	CHRNA5	Naevi	Mel	0.0144024	TRUE	277		geneComp_00035691	ENSG00000243753.5	HLA-L	Type_1	Type_2	0.0010478	277
geneComp_00000351	ENSG00000014257.16	ACPP	Naevi	Mel	0.0145216	TRUE	278		geneComp_00011775	ENSG00000166183.16	ASPG	Type_1	Type_2	0.00107434	278
geneComp_00033002	ENSG00000237289.9	CKMT1B	Naevi	Mel	0.0145503	TRUE	279		geneComp_00010123	ENSG00000157734.14	SNX22	Type_1	Type_2	0.00108536	279
geneComp_00012590	ENSG00000169436.17	COL22A1	Naevi	Mel	0.0146082	TRUE	280		geneComp_00008368	ENSG00000143367.16	TUFT1	Type_1	Type_2	0.00109163	280
geneComp_00019756	ENSG00000205085.11	FAM71F2	Naevi	Mel	0.0147455	TRUE	281		geneComp_00012992	ENSG00000171195.11	MUC7	Type_1	Type_2	0.00112166	281
geneComp_00016836	ENSG00000189057.11	FAM111B	Naevi	Mel	0.0148501	TRUE	282		geneComp_00054033	ENSG00000284606.1	AC105233.5	Type_1	Type_2	0.00114258	282
geneComp_00009441	ENSG00000151725.12	CENPU	Naevi	Mel	0.0152418	TRUE	283		geneComp_00004077	ENSG00000112559.14	MDFI	Type_1	Type_2	0.00116544	283
geneComp_00006608	ENSG00000132554.20	RGS22	Naevi	Mel	0.0152571	TRUE	284		geneComp_00011928	ENSG00000166803.13	PCLAF	Type_1	Type_2	0.00117552	284
geneComp_00008472	ENSG00000143850.16	PLEKHA6	Naevi	Mel	0.0153043	TRUE	285		geneComp_00045461	ENSG00000262943.7	ALOX12P2	Type_1	Type_2	0.00118504	285
geneComp_00013492	ENSG00000173391.9	OLR1	Naevi	Mel	0.0153821	TRUE	286		geneComp_00012823	ENSG00000170469.10	SPATA24	Type_1	Type_2	0.00118785	286
geneComp_00013589	ENSG00000173890.17	GPR160	Naevi	Mel	0.0153826	TRUE	287		geneComp_00021878	ENSG00000213722.9	DDAH2	Type_1	Type_2	0.00119738	287
geneComp_00010855	ENSG00000162923.16	WDR26	Naevi	Mel	0.0156381	TRUE	288		geneComp_00001652	ENSG00000085276.19	MECOM	Type_1	Type_2	0.00120193	288
geneComp_00048373	ENSG00000269897.5	COMMD3-BMI1	Naevi	Mel	0.0157639	TRUE	289		geneComp_00005162	ENSG00000121406.9	ZNF549	Type_1	Type_2	0.0012101	289
geneComp_00031349	ENSG00000234753.5	FOXP4-AS1	Naevi	Mel	0.0164701	TRUE	290		geneComp_00032454	ENSG00000236449.2	AC010894.3	Type_1	Type_2	0.0012683	290
geneComp_00039499	ENSG00000253305.2	PCDHGB6	Naevi	Mel	0.0166638	TRUE	291		geneComp_00009734	ENSG00000154237.13	LRRK1	Type_1	Type_2	0.00127416	291
geneComp_00047455	ENSG00000267454.6	ZNF582-AS1	Naevi	Mel	0.0167699	TRUE	292		geneComp_00053085	ENSG00000280721.1	LINC01943	Type_1	Type_2	0.00127914	292
geneComp_00016413	ENSG00000187416.12	LHFPL3	Naevi	Mel	0.0168039	TRUE	293		geneComp_00003584	ENSG00000108786.10	HSD17B1	Type_1	Type_2	0.00128875	293
geneComp_00045248	ENSG00000262001.1	DLGAP1-AS2	Naevi	Mel	0.0171557	TRUE	294		geneComp_00044113	ENSG00000260280.5	SLX1B-SULT1A4	Type_1	Type_2	0.00133288	294
geneComp_00007603	ENSG00000138092.11	CENPO	Naevi	Mel	0.0172296	TRUE	295		geneComp_00030055	ENSG00000232807.2	AL137186.2	Type_1	Type_2	0.00134034	295
geneComp_00011593	ENSG00000165476.14	REEP3	Naevi	Mel	0.0173607	TRUE	296		geneComp_00046311	ENSG00000265148.6	TSPOAP1-AS1	Type_1	Type_2	0.00136278	296
geneComp_00050158	ENSG00000273143.2	AL355512.1	Naevi	Mel	0.0174243	TRUE	297		geneComp_00001283	ENSG00000074966.11	TXK	Type_1	Type_2	0.00138668	297
geneComp_00036143	ENSG00000245105.4	A2M-AS1	Naevi	Mel	0.0174299	TRUE	298		geneComp_00015646	ENSG00000184206.12	GOLGA6L4	Type_1	Type_2	0.00139525	298
geneComp_00041140	ENSG00000255328.1	AC136475.5	Naevi	Mel	0.0180445	TRUE	299		geneComp_00001569	ENSG00000082458.12	DLG3	Type_1	Type_2	0.00140292	299
geneComp_00044402	ENSG00000260691.6	ANKRD20A1	Naevi	Mel	0.0180589	TRUE	300		geneComp_00000247	ENSG00000010030.14	ETV7	Type_1	Type_2	0.00140786	300
geneComp_00006817	ENSG00000134020.8	PEBP4	Naevi	Mel	0.018178	TRUE	301		geneComp_00004129	ENSG00000112984.12	KIF20A	Type_1	Type_2	0.00140825	301
geneComp_00019602	ENSG00000204625.10	HCG9	Naevi	Mel	0.0182169	TRUE	302		geneComp_00000566	ENSG00000040199.18	PHLPP2	Type_1	Type_2	0.00141817	302
geneComp_00029869	ENSG00000232527.8	LINC02802	Naevi	Mel	0.0182316	TRUE	303		geneComp_00028481	ENSG00000230387.4	AL118508.1	Type_1	Type_2	0.00143463	303
geneComp_00010096	ENSG00000157470.12	FAM81A	Naevi	Mel	0.0183331	TRUE	304		geneComp_00011877	ENSG00000166546.14	BEAN1	Type_1	Type_2	0.00144025	304
geneComp_00006520	ENSG00000131979.19	GCH1	Naevi	Mel	0.0185943	TRUE	305		geneComp_00006720	ENSG00000133121.21	STARD13	Type_1	Type_2	0.0014722	305
geneComp_00011357	ENSG00000164494.12	PDSS2	Naevi	Mel	0.0190627	TRUE	306		geneComp_00005376	ENSG00000123384.14	LRP1	Type_1	Type_2	0.00154913	306
geneComp_00012089	ENSG00000167476.10	JSRP1	Naevi	Mel	0.0191687	TRUE	307		geneComp_00009784	ENSG00000154655.15	L3MBTL4	Type_1	Type_2	0.0015984	307
geneComp_00005560	ENSG00000124635.8	HIST1H2BJ	Naevi	Mel	0.0195885	TRUE	308		geneComp_00006698	ENSG00000133048.13	CHI3L1	Type_1	Type_2	0.00166031	308
geneComp_00009709	ENSG00000154080.14	CHST9	Naevi	Mel	0.0196572	TRUE	309		geneComp_00017898	ENSG00000198915.11	RASGEF1A	Type_1	Type_2	0.00179492	309
geneComp_00023402	ENSG00000221867.9	MAGEA3	Naevi	Mel	0.0200084	TRUE	310		geneComp_00012639	ENSG00000169684.13	CHRNA5	Type_1	Type_2	0.00179725	310
geneComp_00052254	ENSG00000277693.2	AP003900.1	Naevi	Mel	0.0201005	TRUE	311		geneComp_00054851	ENSG00000286011.1	AC062037.3	Type_1	Type_2	0.00180597	311
geneComp_00016741	ENSG00000188707.6	ZBED6CL	Naevi	Mel	0.0203672	TRUE	312		geneComp_00029021	ENSG00000231185.7	SPRY4-AS1	Type_1	Type_2	0.00180651	312
geneComp_00012189	ENSG00000167779.9	IGFBP6	Naevi	Mel	0.0205356	TRUE	313		geneComp_00014552	ENSG00000178935.5	ZNF552	Type_1	Type_2	0.00187196	313
geneComp_00008594	ENSG00000144668.12	ITGA9	Naevi	Mel	0.0207516	TRUE	314		geneComp_00015643	ENSG00000184194.5	GPR173	Type_1	Type_2	0.00187196	314
geneComp_00004775	ENSG00000118113.12	MMP8	Naevi	Mel	0.0207984	TRUE	315		geneComp_00000474	ENSG00000028528.15	SNX1	Type_1	Type_2	0.00190529	315
geneComp_00013905	ENSG00000175600.15	SUGCT	Naevi	Mel	0.0209842	TRUE	316		geneComp_00000629	ENSG00000047634.15	SCML1	Type_1	Type_2	0.00192742	316
geneComp_00002138	ENSG00000099940.12	SNAP29	Naevi	Mel	0.0210048	TRUE	317		geneComp_00034969	ENSG00000241945.8	PWP2	Type_1	Type_2	0.00193528	317
geneComp_00008225	ENSG00000142444.7	TIMM29	Naevi	Mel	0.0210714	TRUE	318		geneComp_00006356	ENSG00000130856.16	ZNF236	Type_1	Type_2	0.00201137	318
geneComp_00009607	ENSG00000153064.12	BANK1	Naevi	Mel	0.0212078	TRUE	319		geneComp_00000661	ENSG00000049249.8	TNFRSF9	Type_1	Type_2	0.00208754	319
geneComp_00011898	ENSG00000166670.10	MMP10	Naevi	Mel	0.0213344	TRUE	320		geneComp_00034331	ENSG00000240350.2	AC017002.3	Type_1	Type_2	0.00208977	320
geneComp_00044457	ENSG00000260778.5	AC009065.4	Naevi	Mel	0.0217962	TRUE	321		geneComp_00047307	ENSG00000267272.5	LINC01140	Type_1	Type_2	0.00211766	321
geneComp_00012261	ENSG00000168062.10	BATF2	Naevi	Mel	0.0220382	TRUE	322		geneComp_00019670	ENSG00000204832.10	ST8SIA6-AS1	Type_1	Type_2	0.00215238	322
geneComp_00014834	ENSG00000180398.12	MCFD2	Naevi	Mel	0.022207	TRUE	323		geneComp_00003857	ENSG00000111215.12	PRR4	Type_1	Type_2	0.00219934	323
geneComp_00003432	ENSG00000107611.15	CUBN	Naevi	Mel	0.0224975	TRUE	324		geneComp_00005618	ENSG00000125245.12	GPR18	Type_1	Type_2	0.00227067	324
geneComp_00054691	ENSG00000285838.2	AL646090.2	Naevi	Mel	0.0226027	TRUE	325		geneComp_00000459	ENSG00000026559.14	KCNG1	Type_1	Type_2	0.00233446	325
geneComp_00029378	ENSG00000231760.5	AL355312.2	Naevi	Mel	0.0229309	TRUE	326		geneComp_00049967	ENSG00000272808.4	AC015712.6	Type_1	Type_2	0.00234652	326
geneComp_00011092	ENSG00000163694.15	RBM47	Naevi	Mel	0.0235294	TRUE	327		geneComp_00003172	ENSG00000105697.9	HAMP	Type_1	Type_2	0.00235112	327
geneComp_00008249	ENSG00000142606.16	MMEL1	Naevi	Mel	0.0237284	TRUE	328		geneComp_00005094	ENSG00000120756.13	PLS1	Type_1	Type_2	0.0023619	328
geneComp_00054051	ENSG00000284624.1	AC092902.4	Naevi	Mel	0.0238649	TRUE	329		geneComp_00032645	ENSG00000236740.6	AL033384.1	Type_1	Type_2	0.00242567	329
geneComp_00025443	ENSG00000225766.10	DHRS4L1	Naevi	Mel	0.0239252	TRUE	330		geneComp_00004230	ENSG00000113805.8	CNTN3	Type_1	Type_2	0.0024289	330
geneComp_00004655	ENSG00000117009.12	KMO	Naevi	Mel	0.024707	TRUE	331		geneComp_00015790	ENSG00000184828.10	ZBTB7C	Type_1	Type_2	0.00248189	331
geneComp_00005264	ENSG00000122477.12	LRRC39	Naevi	Mel	0.0247981	TRUE	332		geneComp_00008164	ENSG00000141750.7	STAC2	Type_1	Type_2	0.0025518	332
geneComp_00004051	ENSG00000112333.11	NR2E1	Naevi	Mel	0.0250902	TRUE	333		geneComp_00000216	ENSG00000008323.15	PLEKHG6	Type_1	Type_2	0.00257945	333
geneComp_00009700	ENSG00000154001.14	PPP2R5E	Naevi	Mel	0.0251234	TRUE	334		geneComp_00007071	ENSG00000135423.13	GLS2	Type_1	Type_2	0.00261343	334
geneComp_00000330	ENSG00000013297.11	CLDN11	Naevi	Mel	0.0261116	TRUE	335		geneComp_00008933	ENSG00000147166.11	ITGB1BP2	Type_1	Type_2	0.00263384	335
geneComp_00001788	ENSG00000088812.18	ATRN	Naevi	Mel	0.0262267	TRUE	336		geneComp_00009145	ENSG00000148935.11	GAS2	Type_1	Type_2	0.00265948	336
geneComp_00008120	ENSG00000141506.13	PIK3R5	Naevi	Mel	0.0262267	TRUE	337		geneComp_00012414	ENSG00000168754.15	FAM178B	Type_1	Type_2	0.00267394	337
geneComp_00013045	ENSG00000171446.7	KRT27	Naevi	Mel	0.0266165	TRUE	338		geneComp_00017581	ENSG00000198054.12	DSCR8	Type_1	Type_2	0.00272861	338
geneComp_00009347	ENSG00000151025.11	GPR158	Naevi	Mel	0.0266534	TRUE	339		geneComp_00010614	ENSG00000161649.13	CD300LG	Type_1	Type_2	0.0027687	339
geneComp_00042815	ENSG00000258657.5	AL136018.1	Naevi	Mel	0.0267981	TRUE	340		geneComp_00003856	ENSG00000111206.12	FOXM1	Type_1	Type_2	0.00278444	340
geneComp_00032848	ENSG00000237036.5	ZEB1-AS1	Naevi	Mel	0.027001	TRUE	341		geneComp_00011332	ENSG00000164398.14	ACSL6	Type_1	Type_2	0.00278917	341
geneComp_00008535	ENSG00000144231.11	POLR2D	Naevi	Mel	0.0272587	TRUE	342		geneComp_00004978	ENSG00000119917.14	IFIT3	Type_1	Type_2	0.00286453	342
geneComp_00014704	ENSG00000179750.16	APOBEC3B	Naevi	Mel	0.0272587	TRUE	343		geneComp_00044549	ENSG00000260908.1	AC009093.3	Type_1	Type_2	0.00287406	343
geneComp_00004500	ENSG00000115919.15	KYNU	Naevi	Mel	0.0279271	TRUE	344		geneComp_00010444	ENSG00000160219.12	GAB3	Type_1	Type_2	0.00292947	344
geneComp_00017581	ENSG00000198054.12	DSCR8	Naevi	Mel	0.0289024	TRUE	345		geneComp_00003287	ENSG00000106327.13	TFR2	Type_1	Type_2	0.00293001	345
geneComp_00001340	ENSG00000076248.10	UNG	Naevi	Mel	0.0298197	TRUE	346		geneComp_00010831	ENSG00000162825.16	NBPF20	Type_1	Type_2	0.00294048	346
geneComp_00004262	ENSG00000114200.10	BCHE	Naevi	Mel	0.0299095	TRUE	347		geneComp_00006885	ENSG00000134339.8	SAA2	Type_1	Type_2	0.00294949	347
geneComp_00002529	ENSG00000101440.9	ASIP	Naevi	Mel	0.0299418	TRUE	348		geneComp_00031776	ENSG00000235387.5	SPAAR	Type_1	Type_2	0.00300043	348
geneComp_00010095	ENSG00000157456.8	CCNB2	Naevi	Mel	0.0305905	TRUE	349		geneComp_00025459	ENSG00000225792.2	AC004540.2	Type_1	Type_2	0.00301324	349
geneComp_00014398	ENSG00000178075.20	GRAMD1C	Naevi	Mel	0.0316785	TRUE	350		geneComp_00014585	ENSG00000179066.8	AC020907.1	Type_1	Type_2	0.00313641	350
geneComp_00012736	ENSG00000170100.13	ZNF778	Naevi	Mel	0.0318895	TRUE	351		geneComp_00011484	ENSG00000164972.13	C9orf24	Type_1	Type_2	0.00315237	351
geneComp_00011487	ENSG00000164978.18	NUDT2	Naevi	Mel	0.0330397	TRUE	352		geneComp_00003371	ENSG00000106852.15	LHX6	Type_1	Type_2	0.00315925	352
geneComp_00040622	ENSG00000254709.8	IGLL5	Naevi	Mel	0.0334915	TRUE	353		geneComp_00005903	ENSG00000127329.15	PTPRB	Type_1	Type_2	0.00316392	353
geneComp_00003178	ENSG00000105707.14	HPN	Naevi	Mel	0.0335192	TRUE	354		geneComp_00014257	ENSG00000177374.13	HIC1	Type_1	Type_2	0.00320648	354
geneComp_00017551	ENSG00000197971.15	MBP	Naevi	Mel	0.0335335	TRUE	355		geneComp_00047781	ENSG00000268027.5	AC243960.1	Type_1	Type_2	0.00323464	355
geneComp_00019679	ENSG00000204856.12	FAM216A	Naevi	Mel	0.0335335	TRUE	356		geneComp_00003722	ENSG00000109943.9	CRTAM	Type_1	Type_2	0.00324221	356
geneComp_00011655	ENSG00000165698.16	SPACA9	Naevi	Mel	0.033623	TRUE	357		geneComp_00001772	ENSG00000088340.16	FER1L4	Type_1	Type_2	0.00328189	357
geneComp_00001068	ENSG00000069188.17	SDK2	Naevi	Mel	0.0337042	TRUE	358		geneComp_00033002	ENSG00000237289.9	CKMT1B	Type_1	Type_2	0.0032907	358
geneComp_00008554	ENSG00000144406.18	UNC80	Naevi	Mel	0.0338963	TRUE	359		geneComp_00005707	ENSG00000125775.15	SDCBP2	Type_1	Type_2	0.00338383	359
geneComp_00017700	ENSG00000198464.14	ZNF480	Naevi	Mel	0.0342079	TRUE	360		geneComp_00050588	ENSG00000274020.4	LINC01138	Type_1	Type_2	0.00339362	360
geneComp_00005865	ENSG00000126861.5	OMG	Naevi	Mel	0.0362367	TRUE	361		geneComp_00012039	ENSG00000167207.13	NOD2	Type_1	Type_2	0.00343975	361
geneComp_00033370	ENSG00000237840.6	FAM21FP	Naevi	Mel	0.0364984	TRUE	362		geneComp_00012356	ENSG00000168477.19	TNXB	Type_1	Type_2	0.00350536	362
geneComp_00006205	ENSG00000130055.13	GDPD2	Naevi	Mel	0.0374125	TRUE	363		geneComp_00036156	ENSG00000245293.3	AC096564.1	Type_1	Type_2	0.00352165	363
geneComp_00021933	ENSG00000213853.10	EMP2	Naevi	Mel	0.037682	TRUE	364		geneComp_00005393	ENSG00000123500.10	COL10A1	Type_1	Type_2	0.00355072	364
geneComp_00019994	ENSG00000206073.11	SERPINB4	Naevi	Mel	0.0382516	TRUE	365		geneComp_00055041	ENSG00000286219.1	NOTCH2NLC	Type_1	Type_2	0.00359296	365
geneComp_00010626	ENSG00000161798.7	AQP5	Naevi	Mel	0.038386	TRUE	366		geneComp_00010105	ENSG00000157551.19	KCNJ15	Type_1	Type_2	0.0036053	366
geneComp_00043363	ENSG00000259291.2	ZNF710-AS1	Naevi	Mel	0.0385798	TRUE	367		geneComp_00053415	ENSG00000283000.2	LINC02635	Type_1	Type_2	0.00364679	367
geneComp_00022192	ENSG00000214435.8	AS3MT	Naevi	Mel	0.0390541	TRUE	368		geneComp_00006205	ENSG00000130055.13	GDPD2	Type_1	Type_2	0.00365293	368
geneComp_00010775	ENSG00000162631.18	NTNG1	Naevi	Mel	0.0394451	TRUE	369		geneComp_00013530	ENSG00000173578.7	XCR1	Type_1	Type_2	0.00365293	369
geneComp_00003584	ENSG00000108786.10	HSD17B1	Naevi	Mel	0.0403009	TRUE	370		geneComp_00045248	ENSG00000262001.1	DLGAP1-AS2	Type_1	Type_2	0.0036609	370
geneComp_00034332	ENSG00000240356.6	RPL23AP7	Naevi	Mel	0.0408382	TRUE	371		geneComp_00014051	ENSG00000176383.9	B3GNT4	Type_1	Type_2	0.003672	371
geneComp_00009391	ENSG00000151388.11	ADAMTS12	Naevi	Mel	0.041123	TRUE	372		geneComp_00002717	ENSG00000102886.15	GDPD3	Type_1	Type_2	0.00369528	372
geneComp_00010157	ENSG00000158014.15	SLC30A2	Naevi	Mel	0.0414001	TRUE	373		geneComp_00038336	ENSG00000251301.7	LINC02384	Type_1	Type_2	0.00370195	373
geneComp_00001592	ENSG00000083307.12	GRHL2	Naevi	Mel	0.04215	TRUE	374		geneComp_00011143	ENSG00000163864.17	NMNAT3	Type_1	Type_2	0.00371376	374
geneComp_00017137	ENSG00000196652.11	ZKSCAN5	Naevi	Mel	0.0426814	TRUE	375		geneComp_00000224	ENSG00000008516.17	MMP25	Type_1	Type_2	0.00375726	375
geneComp_00029387	ENSG00000231770.6	TMEM44-AS1	Naevi	Mel	0.0428242	TRUE	376		geneComp_00020040	ENSG00000206503.13	HLA-A	Type_1	Type_2	0.00396609	376
geneComp_00007553	ENSG00000137868.19	STRA6	Naevi	Mel	0.0428823	TRUE	377		geneComp_00012826	ENSG00000170476.16	MZB1	Type_1	Type_2	0.0039664	377
geneComp_00014850	ENSG00000180481.11	GLIPR1L2	Naevi	Mel	0.0433324	TRUE	378		geneComp_00011908	ENSG00000166716.10	ZNF592	Type_1	Type_2	0.00401018	378
geneComp_00008492	ENSG00000143970.17	ASXL2	Naevi	Mel	0.0436087	TRUE	379		geneComp_00035909	ENSG00000244242.2	IFITM10	Type_1	Type_2	0.00401704	379
geneComp_00006093	ENSG00000129009.13	ISLR	Naevi	Mel	0.0436987	TRUE	380		geneComp_00019682	ENSG00000204866.8	IGFL2	Type_1	Type_2	0.00409829	380
geneComp_00008302	ENSG00000143061.17	IGSF3	Naevi	Mel	0.0439118	TRUE	381		geneComp_00001005	ENSG00000067208.14	EVI5	Type_1	Type_2	0.00419272	381
geneComp_00019701	ENSG00000204922.5	UQCC3	Naevi	Mel	0.0440261	TRUE	382		geneComp_00042830	ENSG00000258674.5	AC011448.1	Type_1	Type_2	0.0042166	382
geneComp_00011389	ENSG00000164627.18	KIF6	Naevi	Mel	0.0440358	TRUE	383		geneComp_00037926	ENSG00000250654.7	AC023794.4	Type_1	Type_2	0.0042196	383
geneComp_00007766	ENSG00000139144.9	PIK3C2G	Naevi	Mel	0.0442455	TRUE	384		geneComp_00009188	ENSG00000149300.10	C11orf52	Type_1	Type_2	0.00421981	384
geneComp_00005393	ENSG00000123500.10	COL10A1	Naevi	Mel	0.0442968	TRUE	385		geneComp_00008251	ENSG00000142611.17	PRDM16	Type_1	Type_2	0.00423598	385
geneComp_00036178	ENSG00000245648.2	AC022075.1	Naevi	Mel	0.0449113	TRUE	386		geneComp_00009703	ENSG00000154025.15	SLC5A10	Type_1	Type_2	0.00424008	386
geneComp_00006112	ENSG00000129194.8	SOX15	Naevi	Mel	0.0454276	TRUE	387		geneComp_00043248	ENSG00000259153.2	AC004816.1	Type_1	Type_2	0.00430412	387
geneComp_00010709	ENSG00000162390.17	ACOT11	Naevi	Mel	0.046359	TRUE	388		geneComp_00033149	ENSG00000237499.7	WAKMAR2	Type_1	Type_2	0.00432229	388
geneComp_00013376	ENSG00000172818.10	OVOL1	Naevi	Mel	0.0467723	TRUE	389		geneComp_00004707	ENSG00000117425.14	PTCH2	Type_1	Type_2	0.00434814	389
geneComp_00011562	ENSG00000165304.8	MELK	Naevi	Mel	0.0473858	TRUE	390		geneComp_00021937	ENSG00000213859.6	KCTD11	Type_1	Type_2	0.00446126	390
geneComp_00009145	ENSG00000148935.11	GAS2	Naevi	Mel	0.0480864	TRUE	391		geneComp_00009223	ENSG00000149554.13	CHEK1	Type_1	Type_2	0.00460473	391
geneComp_00017150	ENSG00000196684.12	HSH2D	Naevi	Mel	0.0489093	TRUE	392		geneComp_00001516	ENSG00000080947.15	CROCCP3	Type_1	Type_2	0.00464935	392
geneComp_00046586	ENSG00000265817.3	FSBP	Naevi	Mel	0.0489491	TRUE	393		geneComp_00036134	ENSG00000244968.7	LIFR-AS1	Type_1	Type_2	0.00467166	393
									geneComp_00024054	ENSG00000223653.6	AL078459.1	Type_1	Type_2	0.00477094	394
									geneComp_00001415	ENSG00000078177.14	N4BP2	Type_1	Type_2	0.00477697	395
									geneComp_00008608	ENSG00000144747.17	TMF1	Type_1	Type_2	0.00479276	396
									geneComp_00007009	ENSG00000135094.11	SDS	Type_1	Type_2	0.00481319	397
									geneComp_00016127	ENSG00000186105.8	LRRC70	Type_1	Type_2	0.00482267	398
									geneComp_00005578	ENSG00000124772.12	CPNE5	Type_1	Type_2	0.0049027	399
									geneComp_00015005	ENSG00000181355.21	OFCC1	Type_1	Type_2	0.00500079	400
									geneComp_00035429	ENSG00000243069.8	ARHGEF26-AS1	Type_1	Type_2	0.00515095	401
									geneComp_00019828	ENSG00000205403.13	CFI	Type_1	Type_2	0.0051765	402
									geneComp_00054047	ENSG00000284620.2	AF228730.5	Type_1	Type_2	0.0051882	403
									geneComp_00017169	ENSG00000196754.12	S100A2	Type_1	Type_2	0.00542555	404
									geneComp_00007664	ENSG00000138435.16	CHRNA1	Type_1	Type_2	0.00551483	405
									geneComp_00002077	ENSG00000099139.13	PCSK5	Type_1	Type_2	0.00558324	406
									geneComp_00005628	ENSG00000125337.19	KIF25	Type_1	Type_2	0.00582421	407
									geneComp_00030505	ENSG00000233483.3	AC008105.2	Type_1	Type_2	0.00602063	408
									geneComp_00015954	ENSG00000185453.13	ZSWIM9	Type_1	Type_2	0.00613795	409
									geneComp_00004746	ENSG00000117650.13	NEK2	Type_1	Type_2	0.00625085	410
									geneComp_00009152	ENSG00000149016.16	TUT1	Type_1	Type_2	0.00635532	411
									geneComp_00009702	ENSG00000154016.13	GRAP	Type_1	Type_2	0.00638886	412
									geneComp_00011841	ENSG00000166428.13	PLD4	Type_1	Type_2	0.0064713	413
									geneComp_00005256	ENSG00000122378.14	PRXL2A	Type_1	Type_2	0.00653406	414
									geneComp_00015516	ENSG00000183666.17	GUSBP1	Type_1	Type_2	0.00654749	415
									geneComp_00010134	ENSG00000157833.13	GAREM2	Type_1	Type_2	0.0068799	416
									geneComp_00021973	ENSG00000213927.4	CCL27	Type_1	Type_2	0.0069689	417
									geneComp_00010627	ENSG00000161800.13	RACGAP1	Type_1	Type_2	0.00708699	418
									geneComp_00029496	ENSG00000231943.9	PGM5P4-AS1	Type_1	Type_2	0.0070933	419
									geneComp_00052982	ENSG00000280081.4	LINC01667	Type_1	Type_2	0.00709821	420
									geneComp_00025979	ENSG00000226562.4	CYP4F26P	Type_1	Type_2	0.00717658	421
									geneComp_00030765	ENSG00000233871.2	DLG5-AS1	Type_1	Type_2	0.00718751	422
									geneComp_00043382	ENSG00000259316.11	AC087632.2	Type_1	Type_2	0.00721717	423
									geneComp_00048207	ENSG00000269386.5	RAB11B-AS1	Type_1	Type_2	0.00742833	424
									geneComp_00007779	ENSG00000139187.10	KLRG1	Type_1	Type_2	0.00764682	425
									geneComp_00000099	ENSG00000005448.16	WDR54	Type_1	Type_2	0.00766338	426
									geneComp_00021955	ENSG00000213889.10	PPM1N	Type_1	Type_2	0.00787803	427
									geneComp_00000643	ENSG00000048462.11	TNFRSF17	Type_1	Type_2	0.00815186	428
									geneComp_00042815	ENSG00000258657.5	AL136018.1	Type_1	Type_2	0.00822731	429
									geneComp_00007766	ENSG00000139144.9	PIK3C2G	Type_1	Type_2	0.00874574	430
									geneComp_00051973	ENSG00000277089.4	AC243829.4	Type_1	Type_2	0.00887425	431
									geneComp_00013322	ENSG00000172543.8	CTSW	Type_1	Type_2	0.0089183	432
									geneComp_00000521	ENSG00000035499.13	DEPDC1B	Type_1	Type_2	0.00892408	433
									geneComp_00025931	ENSG00000226496.3	LINC00323	Type_1	Type_2	0.0089733	434
									geneComp_00050750	ENSG00000274372.5	LINC02804	Type_1	Type_2	0.00909484	435
									geneComp_00039647	ENSG00000253490.5	LINC02099	Type_1	Type_2	0.00910427	436
									geneComp_00003225	ENSG00000105963.15	ADAP1	Type_1	Type_2	0.00926374	437
									geneComp_00016509	ENSG00000187796.14	CARD9	Type_1	Type_2	0.00950015	438
									geneComp_00016700	ENSG00000188559.15	RALGAPA2	Type_1	Type_2	0.00963791	439
									geneComp_00002685	ENSG00000102554.14	KLF5	Type_1	Type_2	0.00977698	440
									geneComp_00014082	ENSG00000176542.10	USF3	Type_1	Type_2	0.00985724	441
									geneComp_00037092	ENSG00000249306.6	LINC01411	Type_1	Type_2	0.00988368	442
									geneComp_00014902	ENSG00000180801.14	ARSJ	Type_1	Type_2	0.00999609	443
									geneComp_00010677	ENSG00000162129.14	CLPB	Type_1	Type_2	0.0100218	444
									geneComp_00045478	ENSG00000263004.2	AC007114.1	Type_1	Type_2	0.0100237	445
									geneComp_00016708	ENSG00000188599.17	NPIPP1	Type_1	Type_2	0.0102991	446
									geneComp_00050152	ENSG00000273136.7	NBPF26	Type_1	Type_2	0.0103347	447
									geneComp_00015434	ENSG00000183336.8	BOLA2	Type_1	Type_2	0.0104006	448
									geneComp_00016654	ENSG00000188372.15	ZP3	Type_1	Type_2	0.0105434	449
									geneComp_00012361	ENSG00000168490.14	PHYHIP	Type_1	Type_2	0.0105785	450
									geneComp_00017922	ENSG00000198959.12	TGM2	Type_1	Type_2	0.0105785	451
									geneComp_00054255	ENSG00000285077.2	AC091057.6	Type_1	Type_2	0.0107082	452
									geneComp_00010663	ENSG00000162039.15	MEIOB	Type_1	Type_2	0.0108341	453
									geneComp_00014018	ENSG00000176222.9	ZNF404	Type_1	Type_2	0.0110339	454
									geneComp_00033398	ENSG00000237883.2	DGUOK-AS1	Type_1	Type_2	0.0111156	455
									geneComp_00025613	ENSG00000226025.9	AC005515.1	Type_1	Type_2	0.0113067	456
									geneComp_00040685	ENSG00000254788.7	CKLF-CMTM1	Type_1	Type_2	0.0113746	457
									geneComp_00017366	ENSG00000197405.8	C5AR1	Type_1	Type_2	0.0115105	458
									geneComp_00053126	ENSG00000280987.4	MATR3	Type_1	Type_2	0.0115763	459
									geneComp_00013671	ENSG00000174405.13	LIG4	Type_1	Type_2	0.0117513	460
									geneComp_00006217	ENSG00000130176.8	CNN1	Type_1	Type_2	0.0121146	461
									geneComp_00014635	ENSG00000179304.16	FAM156B	Type_1	Type_2	0.0121146	462
									geneComp_00016869	ENSG00000189180.16	ZNF33A	Type_1	Type_2	0.0121362	463
									geneComp_00053077	ENSG00000280693.2	SH3PXD2A-AS1	Type_1	Type_2	0.0122297	464
									geneComp_00001557	ENSG00000082126.18	MPP4	Type_1	Type_2	0.012337	465
									geneComp_00013920	ENSG00000175707.9	KDF1	Type_1	Type_2	0.0124335	466
									geneComp_00010821	ENSG00000162775.16	RBM15	Type_1	Type_2	0.0125101	467
									geneComp_00001091	ENSG00000069974.16	RAB27A	Type_1	Type_2	0.0128888	468
									geneComp_00046394	ENSG00000265366.6	GLUD1P2	Type_1	Type_2	0.013527	469
									geneComp_00012089	ENSG00000167476.10	JSRP1	Type_1	Type_2	0.0140922	470
									geneComp_00017128	ENSG00000196616.14	ADH1B	Type_1	Type_2	0.0141222	471
									geneComp_00012221	ENSG00000167920.10	TMEM99	Type_1	Type_2	0.0141517	472
									geneComp_00002270	ENSG00000100336.17	APOL4	Type_1	Type_2	0.0142324	473
									geneComp_00035673	ENSG00000243708.10	PLA2G4B	Type_1	Type_2	0.0143245	474
									geneComp_00016358	ENSG00000187079.17	TEAD1	Type_1	Type_2	0.0144627	475
									geneComp_00012143	ENSG00000167653.5	PSCA	Type_1	Type_2	0.0146277	476
									geneComp_00007859	ENSG00000139668.9	WDFY2	Type_1	Type_2	0.0147552	477
									geneComp_00012861	ENSG00000170627.11	GTSF1	Type_1	Type_2	0.0149139	478
									geneComp_00037578	ENSG00000250125.4	LINC02232	Type_1	Type_2	0.0149746	479
									geneComp_00054333	ENSG00000285336.1	AC108734.4	Type_1	Type_2	0.0150925	480
									geneComp_00014830	ENSG00000180383.3	DEFB124	Type_1	Type_2	0.0151977	481
									geneComp_00036486	ENSG00000248329.6	APELA	Type_1	Type_2	0.0153651	482
									geneComp_00050870	ENSG00000274628.5	AL669942.1	Type_1	Type_2	0.0153875	483
									geneComp_00001566	ENSG00000082293.13	COL19A1	Type_1	Type_2	0.0154085	484
									geneComp_00019297	ENSG00000203747.11	FCGR3A	Type_1	Type_2	0.0154137	485
									geneComp_00012119	ENSG00000167588.13	GPD1	Type_1	Type_2	0.0154456	486
									geneComp_00009260	ENSG00000149922.10	TBX6	Type_1	Type_2	0.0155422	487
									geneComp_00014442	ENSG00000178297.13	TMPRSS9	Type_1	Type_2	0.0156437	488
									geneComp_00040720	ENSG00000254827.6	SLC22A18AS	Type_1	Type_2	0.0157429	489
									geneComp_00043622	ENSG00000259604.5	AC015712.4	Type_1	Type_2	0.015835	490
									geneComp_00045642	ENSG00000263563.6	UBBP4	Type_1	Type_2	0.0158943	491
									geneComp_00045816	ENSG00000263961.8	RHEX	Type_1	Type_2	0.0160498	492
									geneComp_00007889	ENSG00000139910.20	NOVA1	Type_1	Type_2	0.0162156	493
									geneComp_00011042	ENSG00000163568.15	AIM2	Type_1	Type_2	0.0168982	494
									geneComp_00004011	ENSG00000112159.12	MDN1	Type_1	Type_2	0.0171986	495
									geneComp_00010541	ENSG00000160886.13	LY6K	Type_1	Type_2	0.0176452	496
									geneComp_00015588	ENSG00000183918.16	SH2D1A	Type_1	Type_2	0.0177439	497
									geneComp_00002927	ENSG00000104450.12	SPAG1	Type_1	Type_2	0.0179817	498
									geneComp_00003715	ENSG00000109906.14	ZBTB16	Type_1	Type_2	0.018517	499
									geneComp_00010197	ENSG00000158373.8	HIST1H2BD	Type_1	Type_2	0.0190489	500
									geneComp_00004195	ENSG00000113555.5	PCDH12	Type_1	Type_2	0.0191213	501
									geneComp_00008285	ENSG00000142875.19	PRKACB	Type_1	Type_2	0.0192807	502
									geneComp_00002253	ENSG00000100298.15	APOBEC3H	Type_1	Type_2	0.0193952	503
									geneComp_00054648	ENSG00000285791.1	AC009879.3	Type_1	Type_2	0.019442	504
									geneComp_00016201	ENSG00000186395.8	KRT10	Type_1	Type_2	0.019455	505
									geneComp_00008966	ENSG00000147437.10	GNRH1	Type_1	Type_2	0.0202232	506
									geneComp_00009009	ENSG00000147689.16	FAM83A	Type_1	Type_2	0.0203894	507
									geneComp_00013034	ENSG00000171403.10	KRT9	Type_1	Type_2	0.0204348	508
									geneComp_00036229	ENSG00000246263.3	UBR5-AS1	Type_1	Type_2	0.0207031	509
									geneComp_00006131	ENSG00000129353.15	SLC44A2	Type_1	Type_2	0.0209558	510
									geneComp_00043477	ENSG00000259429.5	UBE2Q2P2	Type_1	Type_2	0.0216203	511
									geneComp_00014992	ENSG00000181264.8	TLCD5	Type_1	Type_2	0.0218185	512
									geneComp_00004414	ENSG00000115361.8	ACADL	Type_1	Type_2	0.0223576	513
									geneComp_00012489	ENSG00000169035.12	KLK7	Type_1	Type_2	0.0228829	514
									geneComp_00054267	ENSG00000285103.2	AL451123.1	Type_1	Type_2	0.0240209	515
									geneComp_00029255	ENSG00000231563.2	AL139288.1	Type_1	Type_2	0.024088	516
									geneComp_00036890	ENSG00000248975.2	AL133372.2	Type_1	Type_2	0.0249787	517
									geneComp_00001456	ENSG00000079263.19	SP140	Type_1	Type_2	0.0251211	518
									geneComp_00043672	ENSG00000259668.6	AC066613.1	Type_1	Type_2	0.0252779	519
									geneComp_00008274	ENSG00000142748.12	FCN3	Type_1	Type_2	0.0255274	520
									geneComp_00019288	ENSG00000203724.11	C1orf53	Type_1	Type_2	0.0255802	521
									geneComp_00014692	ENSG00000179630.11	LACC1	Type_1	Type_2	0.0256921	522
									geneComp_00019838	ENSG00000205436.7	EXOC3L4	Type_1	Type_2	0.0258035	523
									geneComp_00016023	ENSG00000185736.16	ADARB2	Type_1	Type_2	0.0258038	524
									geneComp_00042089	ENSG00000257390.5	AC023055.1	Type_1	Type_2	0.0261545	525
									geneComp_00025160	ENSG00000225339.4	AL354740.1	Type_1	Type_2	0.02637	526
									geneComp_00006137	ENSG00000129451.12	KLK10	Type_1	Type_2	0.026484	527
									geneComp_00007535	ENSG00000137812.19	KNL1	Type_1	Type_2	0.0270098	528
									geneComp_00001699	ENSG00000086548.9	CEACAM6	Type_1	Type_2	0.0270348	529
									geneComp_00015828	ENSG00000184986.11	TMEM121	Type_1	Type_2	0.0280183	530
									geneComp_00011870	ENSG00000166523.8	CLEC4E	Type_1	Type_2	0.028045	531
									geneComp_00010956	ENSG00000163293.12	NIPAL1	Type_1	Type_2	0.0281244	532
									geneComp_00013139	ENSG00000171812.13	COL8A2	Type_1	Type_2	0.0297238	533
									geneComp_00051019	ENSG00000274956.2	NKAIN3-IT1	Type_1	Type_2	0.0297993	534
									geneComp_00019287	ENSG00000203722.8	RAET1G	Type_1	Type_2	0.0299959	535
									geneComp_00012973	ENSG00000171121.16	KCNMB3	Type_1	Type_2	0.0305328	536
									geneComp_00024740	ENSG00000224687.2	RASAL2-AS1	Type_1	Type_2	0.031212	537
									geneComp_00028251	ENSG00000230061.2	TRPM2-AS	Type_1	Type_2	0.0313662	538
									geneComp_00016342	ENSG00000187010.21	RHD	Type_1	Type_2	0.0315481	539
									geneComp_00019472	ENSG00000204314.12	PRRT1	Type_1	Type_2	0.0316766	540
									geneComp_00019327	ENSG00000203857.10	HSD3B1	Type_1	Type_2	0.0318868	541
									geneComp_00014855	ENSG00000180530.11	NRIP1	Type_1	Type_2	0.0320581	542
									geneComp_00008038	ENSG00000140961.14	OSGIN1	Type_1	Type_2	0.0322442	543
									geneComp_00024347	ENSG00000224093.5	AL109613.1	Type_1	Type_2	0.0322725	544
									geneComp_00001494	ENSG00000080493.17	SLC4A4	Type_1	Type_2	0.0334401	545
									geneComp_00001002	ENSG00000067177.15	PHKA1	Type_1	Type_2	0.0335603	546
									geneComp_00008536	ENSG00000144233.9	AMMECR1L	Type_1	Type_2	0.0340744	547
									geneComp_00016310	ENSG00000186868.15	MAPT	Type_1	Type_2	0.0346054	548
									geneComp_00003706	ENSG00000109805.10	NCAPG	Type_1	Type_2	0.0347231	549
									geneComp_00012712	ENSG00000169981.11	ZNF35	Type_1	Type_2	0.0356619	550
									geneComp_00010919	ENSG00000163145.12	C1QTNF7	Type_1	Type_2	0.0362962	551
									geneComp_00014872	ENSG00000180628.15	PCGF5	Type_1	Type_2	0.0379841	552
									geneComp_00007540	ENSG00000137819.14	PAQR5	Type_1	Type_2	0.0380918	553
									geneComp_00014157	ENSG00000176909.12	MAMSTR	Type_1	Type_2	0.0381346	554
									geneComp_00047082	ENSG00000266993.3	AL050343.2	Type_1	Type_2	0.0382446	555
									geneComp_00017270	ENSG00000197093.11	GAL3ST4	Type_1	Type_2	0.0390582	556
									geneComp_00006191	ENSG00000129990.15	SYT5	Type_1	Type_2	0.0391835	557
									geneComp_00048349	ENSG00000269837.1	IPO5P1	Type_1	Type_2	0.0407202	558
									geneComp_00005264	ENSG00000122477.12	LRRC39	Type_1	Type_2	0.0410745	559
									geneComp_00003589	ENSG00000108813.11	DLX4	Type_1	Type_2	0.0417916	560
									geneComp_00007809	ENSG00000139344.8	AMDHD1	Type_1	Type_2	0.0421195	561
									geneComp_00005709	ENSG00000125780.12	TGM3	Type_1	Type_2	0.0425884	562
									geneComp_00014060	ENSG00000176406.23	RIMS2	Type_1	Type_2	0.0433989	563
									geneComp_00000432	ENSG00000023572.9	GLRX2	Type_1	Type_2	0.0439938	564
									geneComp_00011839	ENSG00000166415.15	WDR72	Type_1	Type_2	0.0439987	565
									geneComp_00028878	ENSG00000230970.4	HHATL-AS1	Type_1	Type_2	0.0449322	566
									geneComp_00054894	ENSG00000286061.1	RCAN3AS	Type_1	Type_2	0.0449757	567
									geneComp_00040702	ENSG00000254806.5	SYS1-DBNDD2	Type_1	Type_2	0.0454798	568
									geneComp_00026734	ENSG00000227706.4	AL713998.1	Type_1	Type_2	0.0458133	569
									geneComp_00011968	ENSG00000166923.12	GREM1	Type_1	Type_2	0.045876	570
									geneComp_00033467	ENSG00000237988.5	OR2I1P	Type_1	Type_2	0.0459648	571
									geneComp_00003277	ENSG00000106261.17	ZKSCAN1	Type_1	Type_2	0.0479026	572
									geneComp_00052779	ENSG00000278878.1	CU638689.1	Type_1	Type_2	0.0487851	573
