# Supplementary material for: A Transcriptome-Wide Isoform Landscape of Melanocytic Nevi and Primary Melanomas Identifies Gene Isoforms Associated with Malignancy
Source: Int J Mol Sci. 2021 Jul 2;22(13):7165. doi: 10.3390/ijms22137165 (PMC8268681; doi:10.3390/ijms22137165)
Supplement: Supplementary file 1 [file ijms-22-07165-s001.zip › 04_Table_S2_30062021.xlsx]

## Sheet: Sheet1
Table S2: List of transcriptomic consequences of isoform switches between the two comparison groups of melanomas versus benign melanocytic nevi and type 1 versus type 2 lesions.
gene_name	condition_1	condition_2	isoformUpregulated	isoformDownregulated	featureCompared	switchConsequence		gene_name	condition_1	condition_2	isoformUpregulated	isoformDownregulated	featureCompared	switchConsequence
RAB6B	Naevi	Mel	ENST00000486858.5	ENST00000285208.9	intron_retention	Intron retention loss		SH2D3A	Type_1	Type_2	ENST00000245908.11	ENST00000595369.1	coding_potential	Transcript is coding
MSR1	Naevi	Mel	ENST00000381998.8	ENST00000517522.1	coding_potential	Transcript is coding		SH2D3A	Type_1	Type_2	ENST00000245908.11	ENST00000595369.1	ORF_seq_similarity	Complete ORF gain
MSR1	Naevi	Mel	ENST00000381998.8	ENST00000517522.1	ORF_seq_similarity	Complete ORF gain		SH2D3A	Type_1	Type_2	ENST00000245908.11	ENST00000595369.1	domains_identified	Domain gain
MSR1	Naevi	Mel	ENST00000381998.8	ENST00000517522.1	domains_identified	Domain gain		KCNK6	Type_1	Type_2	ENST00000263372.5	ENST00000588137.1	coding_potential	Transcript is coding
LYPD1	Naevi	Mel	ENST00000345008.6	ENST00000397463.3	coding_potential	Transcript is coding		KCNK6	Type_1	Type_2	ENST00000263372.5	ENST00000588137.1	ORF_seq_similarity	Complete ORF gain
LYPD1	Naevi	Mel	ENST00000345008.6	ENST00000397463.3	ORF_seq_similarity	Complete ORF gain		KCNK6	Type_1	Type_2	ENST00000263372.5	ENST00000588137.1	domains_identified	Domain gain
COL11A2	Naevi	Mel	ENST00000341947.6	ENST00000361917.5	domains_identified	Domain gain		TMPRSS4	Type_1	Type_2	ENST00000524218.1	ENST00000437212.8	ORF_seq_similarity	Complete ORF loss
COL11A2	Naevi	Mel	ENST00000341947.6	ENST00000477772.1	ORF_seq_similarity	Complete ORF gain		TMPRSS4	Type_1	Type_2	ENST00000524218.1	ENST00000437212.8	domains_identified	Domain loss
COL11A2	Naevi	Mel	ENST00000341947.6	ENST00000477772.1	domains_identified	Domain gain		TMPRSS4	Type_1	Type_2	ENST00000524218.1	ENST00000528118.5	intron_retention	Intron retention loss
COL11A2	Naevi	Mel	ENST00000395194.1	ENST00000361917.5	ORF_seq_similarity	ORF is shorter		TMPRSS4	Type_1	Type_2	ENST00000524218.1	ENST00000528118.5	coding_potential	Transcript is coding
COL11A2	Naevi	Mel	ENST00000395194.1	ENST00000361917.5	domains_identified	Domain loss		NEBL	Type_1	Type_2	ENST00000377122.8	ENST00000493005.5	intron_retention	Intron retention loss
COL11A2	Naevi	Mel	ENST00000395194.1	ENST00000477772.1	ORF_seq_similarity	Complete ORF gain		NEBL	Type_1	Type_2	ENST00000377122.8	ENST00000493005.5	ORF_seq_similarity	Complete ORF gain
COL11A2	Naevi	Mel	ENST00000395194.1	ENST00000477772.1	domains_identified	Domain gain		NEBL	Type_1	Type_2	ENST00000377122.8	ENST00000493005.5	domains_identified	Domain gain
GRIA1	Naevi	Mel	ENST00000492291.1	ENST00000285900.10	coding_potential	Transcript is Noncoding		CYSLTR1	Type_1	Type_2	ENST00000373304.4	ENST00000493254.1	coding_potential	Transcript is coding
GRIA1	Naevi	Mel	ENST00000492291.1	ENST00000285900.10	ORF_seq_similarity	Complete ORF loss		CYSLTR1	Type_1	Type_2	ENST00000373304.4	ENST00000493254.1	ORF_seq_similarity	Complete ORF gain
GRIA1	Naevi	Mel	ENST00000492291.1	ENST00000285900.10	domains_identified	Domain loss		CYSLTR1	Type_1	Type_2	ENST00000373304.4	ENST00000493254.1	domains_identified	Domain gain
GRIA1	Naevi	Mel	ENST00000492291.1	ENST00000518783.1	coding_potential	Transcript is Noncoding		PRKCH	Type_1	Type_2	ENST00000555082.5	ENST00000554835.1	coding_potential	Transcript is coding
GRIA1	Naevi	Mel	ENST00000492291.1	ENST00000518783.1	ORF_seq_similarity	Complete ORF loss		PRKCH	Type_1	Type_2	ENST00000555082.5	ENST00000554835.1	ORF_seq_similarity	Complete ORF gain
GRIA1	Naevi	Mel	ENST00000492291.1	ENST00000518783.1	domains_identified	Domain loss		PRKCH	Type_1	Type_2	ENST00000555082.5	ENST00000554835.1	domains_identified	Domain gain
CHEK1	Naevi	Mel	ENST00000438015.6	ENST00000525396.5	intron_retention	Intron retention gain		ICOSLG	Type_1	Type_2	ENST00000407780.7	ENST00000643466.1	coding_potential	Transcript is coding
CHEK1	Naevi	Mel	ENST00000438015.6	ENST00000525396.5	coding_potential	Transcript is coding		ICOSLG	Type_1	Type_2	ENST00000407780.7	ENST00000643466.1	ORF_seq_similarity	Complete ORF gain
CHEK1	Naevi	Mel	ENST00000438015.6	ENST00000525396.5	ORF_seq_similarity	Complete ORF gain		ICOSLG	Type_1	Type_2	ENST00000407780.7	ENST00000643466.1	domains_identified	Domain gain
CHEK1	Naevi	Mel	ENST00000438015.6	ENST00000525396.5	domains_identified	Domain gain		SMAGP	Type_1	Type_2	ENST00000398453.7	ENST00000380103.4	coding_potential	Transcript is coding
NALCN	Naevi	Mel	ENST00000376200.5	ENST00000251127.11	ORF_seq_similarity	ORF is shorter		SMAGP	Type_1	Type_2	ENST00000398453.7	ENST00000380103.4	ORF_seq_similarity	Complete ORF gain
NALCN	Naevi	Mel	ENST00000376200.5	ENST00000251127.11	domains_identified	Domain loss		LFNG	Type_1	Type_2	ENST00000338732.7	ENST00000402506.5	ORF_seq_similarity	ORF is shorter
C2orf68	Naevi	Mel	ENST00000420686.5	ENST00000306336.6	intron_retention	Intron retention gain		LFNG	Type_1	Type_2	ENST00000614382.1	ENST00000402506.5	ORF_seq_similarity	ORF is shorter
PCGF5	Naevi	Mel	ENST00000490164.1	ENST00000614189.4	coding_potential	Transcript is Noncoding		CCDC69	Type_1	Type_2	ENST00000355417.7	ENST00000522179.1	coding_potential	Transcript is coding
PCGF5	Naevi	Mel	ENST00000490164.1	ENST00000614189.4	ORF_seq_similarity	Complete ORF loss		CCDC69	Type_1	Type_2	ENST00000355417.7	ENST00000522179.1	ORF_seq_similarity	Complete ORF gain
PCGF5	Naevi	Mel	ENST00000490164.1	ENST00000614189.4	domains_identified	Domain loss		SPTLC3	Type_1	Type_2	ENST00000399002.7	ENST00000476791.1	ORF_seq_similarity	Complete ORF gain
SDS	Naevi	Mel	ENST00000257549.9	ENST00000553112.5	ORF_seq_similarity	Complete ORF gain		SPTLC3	Type_1	Type_2	ENST00000399002.7	ENST00000476791.1	domains_identified	Domain gain
SDS	Naevi	Mel	ENST00000257549.9	ENST00000553112.5	domains_identified	Domain gain		KLC3	Type_1	Type_2	ENST00000391946.7	ENST00000589373.5	ORF_seq_similarity	ORF is longer
SNX1	Naevi	Mel	ENST00000560829.5	ENST00000559844.6	intron_retention	Intron retention loss		CLDN4	Type_1	Type_2	ENST00000340958.3	ENST00000431918.1	intron_retention	Intron retention loss
SNX1	Naevi	Mel	ENST00000560829.5	ENST00000559844.6	ORF_seq_similarity	ORF is shorter		CLDN4	Type_1	Type_2	ENST00000340958.3	ENST00000476494.1	coding_potential	Transcript is coding
SNX1	Naevi	Mel	ENST00000560829.5	ENST00000559844.6	domains_identified	Domain loss		CLDN4	Type_1	Type_2	ENST00000340958.3	ENST00000476494.1	ORF_seq_similarity	Complete ORF gain
ABCA9	Naevi	Mel	ENST00000495634.5	ENST00000340001.9	ORF_seq_similarity	ORF is shorter		CLDN4	Type_1	Type_2	ENST00000340958.3	ENST00000476494.1	domains_identified	Domain gain
ABCA9	Naevi	Mel	ENST00000495634.5	ENST00000340001.9	domains_identified	Domain loss		EPHA1	Type_1	Type_2	ENST00000275815.4	ENST00000458129.1	intron_retention	Intron retention gain
ARSD	Naevi	Mel	ENST00000494870.5	ENST00000381154.6	ORF_seq_similarity	Complete ORF loss		EPHA1	Type_1	Type_2	ENST00000275815.4	ENST00000458129.1	coding_potential	Transcript is coding
ARSD	Naevi	Mel	ENST00000494870.5	ENST00000381154.6	domains_identified	Domain loss		EPHA1	Type_1	Type_2	ENST00000275815.4	ENST00000458129.1	ORF_seq_similarity	Complete ORF gain
PCSK2	Naevi	Mel	ENST00000536609.1	ENST00000262545.7	domains_identified	Domain loss		EPHA1	Type_1	Type_2	ENST00000275815.4	ENST00000458129.1	domains_identified	Domain gain
SLC22A18AS	Naevi	Mel	ENST00000526203.1	ENST00000625099.4	ORF_seq_similarity	ORF is shorter		EPHA1	Type_1	Type_2	ENST00000275815.4	ENST00000497891.1	intron_retention	Intron retention gain
AGBL5	Naevi	Mel	ENST00000323064.12	ENST00000487078.5	ORF_seq_similarity	ORF is shorter		EPHA1	Type_1	Type_2	ENST00000275815.4	ENST00000497891.1	coding_potential	Transcript is coding
AGBL5	Naevi	Mel	ENST00000323064.12	ENST00000487078.5	NMD_status	NMD insensitive		EPHA1	Type_1	Type_2	ENST00000275815.4	ENST00000497891.1	ORF_seq_similarity	Complete ORF gain
PEX19	Naevi	Mel	ENST00000368072.9	ENST00000472750.5	ORF_seq_similarity	ORF is longer		EPHA1	Type_1	Type_2	ENST00000275815.4	ENST00000497891.1	domains_identified	Domain gain
PEX19	Naevi	Mel	ENST00000368072.9	ENST00000472750.5	NMD_status	NMD insensitive		LSR	Type_1	Type_2	ENST00000360798.7	ENST00000597446.1	intron_retention	Intron retention gain
PEX19	Naevi	Mel	ENST00000368072.9	ENST00000472750.5	domains_identified	Domain gain		LSR	Type_1	Type_2	ENST00000360798.7	ENST00000597446.1	coding_potential	Transcript is coding
CCDC51	Naevi	Mel	ENST00000447018.5	ENST00000442740.1	intron_retention	Intron retention loss		LSR	Type_1	Type_2	ENST00000360798.7	ENST00000597446.1	ORF_seq_similarity	Complete ORF gain
CRTC1	Naevi	Mel	ENST00000594658.5	ENST00000321949.13	domains_identified	Domain loss		IL7R	Type_1	Type_2	ENST00000303115.8	ENST00000515665.1	coding_potential	Transcript is coding
NDUFAF4	Naevi	Mel	ENST00000478382.1	ENST00000316149.8	coding_potential	Transcript is Noncoding		IL7R	Type_1	Type_2	ENST00000303115.8	ENST00000515665.1	ORF_seq_similarity	Complete ORF gain
NDUFAF4	Naevi	Mel	ENST00000478382.1	ENST00000316149.8	ORF_seq_similarity	Complete ORF loss		IL7R	Type_1	Type_2	ENST00000303115.8	ENST00000515665.1	domains_identified	Domain gain
NDUFAF4	Naevi	Mel	ENST00000478382.1	ENST00000316149.8	domains_identified	Domain loss		FAM83G	Type_1	Type_2	ENST00000388995.11	ENST00000399096.2	intron_retention	Intron retention loss
SEMA6A-AS1	Naevi	Mel	ENST00000507558.1	ENST00000512128.1	coding_potential	Transcript is Noncoding		FAM83G	Type_1	Type_2	ENST00000388995.11	ENST00000399096.2	ORF_seq_similarity	Complete ORF gain
AL109809.5	Naevi	Mel	ENST00000671643.1	ENST00000653463.1	intron_retention	Intron retention gain		FAM83G	Type_1	Type_2	ENST00000388995.11	ENST00000399096.2	domains_identified	Domain gain
AL109809.5	Naevi	Mel	ENST00000671643.1	ENST00000653463.1	coding_potential	Transcript is coding		GSTO2	Type_1	Type_2	ENST00000467629.1	ENST00000450629.6	coding_potential	Transcript is Noncoding
LINC01667	Naevi	Mel	ENST00000623919.1	ENST00000651050.1	intron_retention	Intron retention loss		GSTO2	Type_1	Type_2	ENST00000467629.1	ENST00000450629.6	ORF_seq_similarity	Complete ORF loss
ARHGEF37	Naevi	Mel	ENST00000505810.5	ENST00000333677.7	coding_potential	Transcript is Noncoding		GSTO2	Type_1	Type_2	ENST00000467629.1	ENST00000450629.6	domains_identified	Domain loss
ARHGEF37	Naevi	Mel	ENST00000505810.5	ENST00000333677.7	ORF_seq_similarity	Complete ORF loss		GSTO2	Type_1	Type_2	ENST00000473401.5	ENST00000450629.6	coding_potential	Transcript is Noncoding
ARHGEF37	Naevi	Mel	ENST00000505810.5	ENST00000333677.7	domains_identified	Domain loss		GSTO2	Type_1	Type_2	ENST00000473401.5	ENST00000450629.6	ORF_seq_similarity	Complete ORF loss
GLRX2	Naevi	Mel	ENST00000367439.7	ENST00000608166.2	coding_potential	Transcript is coding		GSTO2	Type_1	Type_2	ENST00000473401.5	ENST00000450629.6	domains_identified	Domain loss
GLRX2	Naevi	Mel	ENST00000367439.7	ENST00000608166.2	ORF_seq_similarity	Complete ORF gain		TLR5	Type_1	Type_2	ENST00000540964.5	ENST00000646044.1	coding_potential	Transcript is coding
GLRX2	Naevi	Mel	ENST00000367439.7	ENST00000608166.2	domains_identified	Domain gain		TLR5	Type_1	Type_2	ENST00000540964.5	ENST00000646044.1	ORF_seq_similarity	Complete ORF gain
MMP13	Naevi	Mel	ENST00000260302.8	ENST00000340273.4	intron_retention	Intron retention gain		TLR5	Type_1	Type_2	ENST00000540964.5	ENST00000646044.1	domains_identified	Domain gain
MMP13	Naevi	Mel	ENST00000260302.8	ENST00000340273.4	domains_identified	Domain gain		PRSS16	Type_1	Type_2	ENST00000421826.6	ENST00000485603.1	ORF_seq_similarity	Complete ORF gain
LRAT	Naevi	Mel	ENST00000510733.1	ENST00000500890.6	intron_retention	Intron retention gain		PRSS16	Type_1	Type_2	ENST00000421826.6	ENST00000485603.1	domains_identified	Domain gain
LRAT	Naevi	Mel	ENST00000510733.1	ENST00000500890.6	coding_potential	Transcript is coding		EEF1A2	Type_1	Type_2	ENST00000217182.6	ENST00000645586.1	intron_retention	Intron retention switch
LAMA1	Naevi	Mel	ENST00000389658.4	ENST00000579014.5	intron_retention	Intron retention loss		EEF1A2	Type_1	Type_2	ENST00000217182.6	ENST00000645586.1	ORF_seq_similarity	Complete ORF gain
LAMA1	Naevi	Mel	ENST00000389658.4	ENST00000579014.5	ORF_seq_similarity	Complete ORF gain		EEF1A2	Type_1	Type_2	ENST00000217182.6	ENST00000645586.1	domains_identified	Domain gain
LAMA1	Naevi	Mel	ENST00000389658.4	ENST00000579014.5	domains_identified	Domain gain		CENPP	Type_1	Type_2	ENST00000375579.7	ENST00000375587.8	coding_potential	Transcript is Noncoding
SHLD1	Naevi	Mel	ENST00000378979.8	ENST00000303142.11	coding_potential	Transcript is Noncoding		CENPP	Type_1	Type_2	ENST00000375579.7	ENST00000375587.8	ORF_seq_similarity	Complete ORF loss
SHLD1	Naevi	Mel	ENST00000378979.8	ENST00000303142.11	ORF_seq_similarity	Complete ORF loss		CENPP	Type_1	Type_2	ENST00000375579.7	ENST00000375587.8	domains_identified	Domain loss
SHLD1	Naevi	Mel	ENST00000378979.8	ENST00000303142.11	domains_identified	Domain loss		POU2F3	Type_1	Type_2	ENST00000532638.1	ENST00000260264.8	ORF_seq_similarity	Complete ORF loss
CLPB	Naevi	Mel	ENST00000538021.5	ENST00000538039.6	ORF_seq_similarity	ORF is shorter		POU2F3	Type_1	Type_2	ENST00000532638.1	ENST00000260264.8	domains_identified	Domain loss
CLPB	Naevi	Mel	ENST00000538021.5	ENST00000538039.6	NMD_status	NMD sensitive		SHISAL2A	Type_1	Type_2	ENST00000517870.2	ENST00000424164.1	coding_potential	Transcript is coding
CLPB	Naevi	Mel	ENST00000538021.5	ENST00000538039.6	domains_identified	Domain loss		SHISAL2A	Type_1	Type_2	ENST00000517870.2	ENST00000424164.1	ORF_seq_similarity	Complete ORF gain
AC107918.4	Naevi	Mel	ENST00000641623.1	ENST00000641966.1	coding_potential	Transcript is Noncoding		ITK	Type_1	Type_2	ENST00000422843.7	ENST00000519402.5	intron_retention	Intron retention loss
CXCL12	Naevi	Mel	ENST00000374429.6	ENST00000343575.10	intron_retention	Intron retention loss		ITK	Type_1	Type_2	ENST00000422843.7	ENST00000519402.5	ORF_seq_similarity	Complete ORF gain
NEK2	Naevi	Mel	ENST00000366999.9	ENST00000366998.4	ORF_seq_similarity	ORF is longer		ITK	Type_1	Type_2	ENST00000422843.7	ENST00000519402.5	domains_identified	Domain gain
CDS2	Naevi	Mel	ENST00000379070.3	ENST00000460006.6	ORF_seq_similarity	Complete ORF loss		ITK	Type_1	Type_2	ENST00000422843.7	ENST00000523926.1	coding_potential	Transcript is coding
CDS2	Naevi	Mel	ENST00000379070.3	ENST00000460006.6	domains_identified	Domain loss		ITK	Type_1	Type_2	ENST00000422843.7	ENST00000523926.1	ORF_seq_similarity	Complete ORF gain
CCDC50	Naevi	Mel	ENST00000392456.4	ENST00000392455.9	ORF_seq_similarity	ORF is shorter		ITK	Type_1	Type_2	ENST00000422843.7	ENST00000523926.1	domains_identified	Domain gain
IMMP2L	Naevi	Mel	ENST00000450877.5	ENST00000331762.7	ORF_seq_similarity	ORF is shorter		ITK	Type_1	Type_2	ENST00000519749.1	ENST00000519402.5	intron_retention	Intron retention loss
IMMP2L	Naevi	Mel	ENST00000450877.5	ENST00000331762.7	domains_identified	Domain loss		ITK	Type_1	Type_2	ENST00000519749.1	ENST00000523926.1	coding_potential	Transcript is coding
ZNF595	Naevi	Mel	ENST00000509152.3	ENST00000608255.2	coding_potential	Transcript is Noncoding		RHOF	Type_1	Type_2	ENST00000267205.7	ENST00000546227.5	coding_potential	Transcript is coding
ZNF595	Naevi	Mel	ENST00000509152.3	ENST00000608255.2	ORF_seq_similarity	Complete ORF loss		RHOF	Type_1	Type_2	ENST00000267205.7	ENST00000546227.5	ORF_seq_similarity	Complete ORF gain
ZNF595	Naevi	Mel	ENST00000509152.3	ENST00000608255.2	domains_identified	Domain loss		RHOF	Type_1	Type_2	ENST00000267205.7	ENST00000546227.5	domains_identified	Domain gain
ZNF595	Naevi	Mel	ENST00000509152.3	ENST00000610261.6	coding_potential	Transcript is Noncoding		SEMA4A	Type_1	Type_2	ENST00000355014.6	ENST00000368284.5	intron_retention	Intron retention gain
ZNF595	Naevi	Mel	ENST00000509152.3	ENST00000610261.6	ORF_seq_similarity	Complete ORF loss		SEMA4A	Type_1	Type_2	ENST00000355014.6	ENST00000368284.5	ORF_seq_similarity	ORF is longer
ZNF595	Naevi	Mel	ENST00000509152.3	ENST00000610261.6	domains_identified	Domain loss		SEMA4A	Type_1	Type_2	ENST00000368285.8	ENST00000368284.5	intron_retention	Intron retention gain
KPNA1	Naevi	Mel	ENST00000470904.5	ENST00000344337.11	intron_retention	Intron retention gain		SEMA4A	Type_1	Type_2	ENST00000368285.8	ENST00000368284.5	ORF_seq_similarity	ORF is longer
KPNA1	Naevi	Mel	ENST00000470904.5	ENST00000344337.11	ORF_seq_similarity	Complete ORF loss		ZBTB46	Type_1	Type_2	ENST00000245663.8	ENST00000480766.1	intron_retention	Intron retention gain
KPNA1	Naevi	Mel	ENST00000470904.5	ENST00000344337.11	domains_identified	Domain loss		ZBTB46	Type_1	Type_2	ENST00000245663.8	ENST00000480766.1	coding_potential	Transcript is coding
LINC00461	Naevi	Mel	ENST00000666342.1	ENST00000670494.1	intron_retention	Intron retention loss		ZBTB46	Type_1	Type_2	ENST00000245663.8	ENST00000480766.1	ORF_seq_similarity	Complete ORF gain
C1GALT1	Naevi	Mel	ENST00000402468.3	ENST00000223122.3	ORF_seq_similarity	ORF is shorter		ZBTB46	Type_1	Type_2	ENST00000245663.8	ENST00000480766.1	domains_identified	Domain gain
GUSBP1	Naevi	Mel	ENST00000508973.5	ENST00000449061.2	coding_potential	Transcript is Noncoding		CD6	Type_1	Type_2	ENST00000313421.11	ENST00000419282.2	coding_potential	Transcript is coding
AC091057.6	Naevi	Mel	ENST00000568574.1	ENST00000646747.1	intron_retention	Intron retention gain		CD6	Type_1	Type_2	ENST00000313421.11	ENST00000419282.2	ORF_seq_similarity	Complete ORF gain
FBLN2	Naevi	Mel	ENST00000295760.11	ENST00000404922.8	domains_identified	Domain loss		CD6	Type_1	Type_2	ENST00000313421.11	ENST00000419282.2	domains_identified	Domain gain
WDR62	Naevi	Mel	ENST00000401500.7	ENST00000589953.1	coding_potential	Transcript is coding		ICAM3	Type_1	Type_2	ENST00000160262.10	ENST00000592439.1	intron_retention	Intron retention gain
WDR62	Naevi	Mel	ENST00000401500.7	ENST00000589953.1	ORF_seq_similarity	Complete ORF gain		ICAM3	Type_1	Type_2	ENST00000160262.10	ENST00000592439.1	coding_potential	Transcript is coding
WDR62	Naevi	Mel	ENST00000401500.7	ENST00000589953.1	domains_identified	Domain gain		ICAM3	Type_1	Type_2	ENST00000160262.10	ENST00000592439.1	ORF_seq_similarity	Complete ORF gain
PHF19	Naevi	Mel	ENST00000312189.10	ENST00000419155.5	ORF_seq_similarity	ORF is shorter		ICAM3	Type_1	Type_2	ENST00000160262.10	ENST00000592439.1	domains_identified	Domain gain
PHF19	Naevi	Mel	ENST00000312189.10	ENST00000419155.5	domains_identified	Domain gain		ICAM3	Type_1	Type_2	ENST00000160262.10	ENST00000592945.1	intron_retention	Intron retention gain
JPT1	Naevi	Mel	ENST00000581874.1	ENST00000409753.8	coding_potential	Transcript is Noncoding		ICAM3	Type_1	Type_2	ENST00000160262.10	ENST00000592945.1	ORF_seq_similarity	ORF is longer
JPT1	Naevi	Mel	ENST00000581874.1	ENST00000409753.8	ORF_seq_similarity	Complete ORF loss		ICAM3	Type_1	Type_2	ENST00000160262.10	ENST00000592945.1	domains_identified	Domain gain
JPT1	Naevi	Mel	ENST00000581874.1	ENST00000409753.8	domains_identified	Domain loss		PSMB10	Type_1	Type_2	ENST00000358514.9	ENST00000570985.1	coding_potential	Transcript is coding
SCN7A	Naevi	Mel	ENST00000497562.1	ENST00000619410.4	coding_potential	Transcript is Noncoding		PSMB10	Type_1	Type_2	ENST00000358514.9	ENST00000570985.1	ORF_seq_similarity	Complete ORF gain
SCN7A	Naevi	Mel	ENST00000497562.1	ENST00000619410.4	ORF_seq_similarity	Complete ORF loss		PSMB10	Type_1	Type_2	ENST00000358514.9	ENST00000570985.1	domains_identified	Domain gain
SCN7A	Naevi	Mel	ENST00000497562.1	ENST00000619410.4	domains_identified	Domain loss		CRLF3	Type_1	Type_2	ENST00000324238.7	ENST00000585268.1	coding_potential	Transcript is coding
SCN7A	Naevi	Mel	ENST00000650747.1	ENST00000619410.4	coding_potential	Transcript is Noncoding		CRLF3	Type_1	Type_2	ENST00000324238.7	ENST00000585268.1	ORF_seq_similarity	Complete ORF gain
SCN7A	Naevi	Mel	ENST00000650747.1	ENST00000619410.4	ORF_seq_similarity	Complete ORF loss		PVRIG	Type_1	Type_2	ENST00000317271.2	ENST00000471803.1	coding_potential	Transcript is coding
SCN7A	Naevi	Mel	ENST00000650747.1	ENST00000619410.4	domains_identified	Domain loss		PVRIG	Type_1	Type_2	ENST00000317271.2	ENST00000471803.1	ORF_seq_similarity	Complete ORF gain
SYT5	Naevi	Mel	ENST00000587067.1	ENST00000590851.5	intron_retention	Intron retention loss		CORIN	Type_1	Type_2	ENST00000273857.9	ENST00000502726.5	intron_retention	Intron retention loss
SYT5	Naevi	Mel	ENST00000587067.1	ENST00000590851.5	coding_potential	Transcript is Noncoding		CORIN	Type_1	Type_2	ENST00000273857.9	ENST00000502726.5	ORF_seq_similarity	Complete ORF gain
SYT5	Naevi	Mel	ENST00000587067.1	ENST00000590851.5	ORF_seq_similarity	Complete ORF loss		CORIN	Type_1	Type_2	ENST00000273857.9	ENST00000502726.5	domains_identified	Domain gain
SYT5	Naevi	Mel	ENST00000587067.1	ENST00000590851.5	domains_identified	Domain loss		CORIN	Type_1	Type_2	ENST00000505754.1	ENST00000502726.5	intron_retention	Intron retention loss
PAEP	Naevi	Mel	ENST00000479141.6	ENST00000418284.5	ORF_seq_similarity	ORF is longer		VAV1	Type_1	Type_2	ENST00000539284.2	ENST00000598270.1	coding_potential	Transcript is coding
PAEP	Naevi	Mel	ENST00000479141.6	ENST00000457014.1	intron_retention	Intron retention loss		VAV1	Type_1	Type_2	ENST00000539284.2	ENST00000598270.1	ORF_seq_similarity	Complete ORF gain
PAEP	Naevi	Mel	ENST00000479141.6	ENST00000457014.1	coding_potential	Transcript is coding		VAV1	Type_1	Type_2	ENST00000539284.2	ENST00000598270.1	domains_identified	Domain gain
PAEP	Naevi	Mel	ENST00000479141.6	ENST00000457014.1	ORF_seq_similarity	Complete ORF gain		AOC1	Type_1	Type_2	ENST00000360937.8	ENST00000483043.1	intron_retention	Intron retention gain
PAEP	Naevi	Mel	ENST00000479141.6	ENST00000457014.1	domains_identified	Domain gain		AOC1	Type_1	Type_2	ENST00000360937.8	ENST00000483043.1	coding_potential	Transcript is coding
AC040168.1	Naevi	Mel	ENST00000665141.1	ENST00000661960.1	intron_retention	Intron retention gain		AOC1	Type_1	Type_2	ENST00000360937.8	ENST00000483043.1	ORF_seq_similarity	Complete ORF gain
CLEC4E	Naevi	Mel	ENST00000545274.5	ENST00000299663.8	ORF_seq_similarity	ORF is shorter		AOC1	Type_1	Type_2	ENST00000360937.8	ENST00000483043.1	domains_identified	Domain gain
SNX13	Naevi	Mel	ENST00000496855.1	ENST00000428135.7	ORF_seq_similarity	Complete ORF loss		CD37	Type_1	Type_2	ENST00000323906.9	ENST00000600121.1	intron_retention	Intron retention gain
SNX13	Naevi	Mel	ENST00000496855.1	ENST00000428135.7	domains_identified	Domain loss		CD37	Type_1	Type_2	ENST00000323906.9	ENST00000600121.1	coding_potential	Transcript is coding
NFASC	Naevi	Mel	ENST00000403080.5	ENST00000495396.5	ORF_seq_similarity	Complete ORF gain		CD37	Type_1	Type_2	ENST00000323906.9	ENST00000600121.1	ORF_seq_similarity	Complete ORF gain
NFASC	Naevi	Mel	ENST00000403080.5	ENST00000495396.5	domains_identified	Domain gain		CD37	Type_1	Type_2	ENST00000323906.9	ENST00000600121.1	domains_identified	Domain gain
CHRNA1	Naevi	Mel	ENST00000348749.9	ENST00000416004.1	coding_potential	Transcript is coding		CXCR6	Type_1	Type_2	ENST00000304552.5	ENST00000458629.1	intron_retention	Intron retention loss
CHRNA1	Naevi	Mel	ENST00000348749.9	ENST00000416004.1	ORF_seq_similarity	Complete ORF gain		RAB4B	Type_1	Type_2	ENST00000357052.8	ENST00000597476.5	ORF_seq_similarity	Complete ORF gain
CHRNA1	Naevi	Mel	ENST00000348749.9	ENST00000416004.1	domains_identified	Domain gain		RAB4B	Type_1	Type_2	ENST00000357052.8	ENST00000597476.5	domains_identified	Domain gain
HSPA4	Naevi	Mel	ENST00000514825.1	ENST00000304858.7	intron_retention	Intron retention loss		TRABD2A	Type_1	Type_2	ENST00000409520.7	ENST00000479944.5	coding_potential	Transcript is coding
HSPA4	Naevi	Mel	ENST00000514825.1	ENST00000304858.7	ORF_seq_similarity	Complete ORF loss		TRABD2A	Type_1	Type_2	ENST00000409520.7	ENST00000479944.5	ORF_seq_similarity	Complete ORF gain
HSPA4	Naevi	Mel	ENST00000514825.1	ENST00000304858.7	domains_identified	Domain loss		TRABD2A	Type_1	Type_2	ENST00000409520.7	ENST00000479944.5	domains_identified	Domain gain
PHYHIP	Naevi	Mel	ENST00000523252.1	ENST00000454243.7	coding_potential	Transcript is Noncoding		KCTD1	Type_1	Type_2	ENST00000417602.5	ENST00000580059.7	ORF_seq_similarity	ORF is shorter
PHYHIP	Naevi	Mel	ENST00000523252.1	ENST00000454243.7	ORF_seq_similarity	Complete ORF loss		KCTD1	Type_1	Type_2	ENST00000417602.5	ENST00000580059.7	domains_identified	Domain loss
GSPT1	Naevi	Mel	ENST00000563468.5	ENST00000434724.7	ORF_seq_similarity	ORF is shorter		CEACAM19	Type_1	Type_2	ENST00000403660.3	ENST00000622237.4	coding_potential	Transcript is coding
GSPT1	Naevi	Mel	ENST00000563468.5	ENST00000434724.7	domains_identified	Domain loss		CEACAM19	Type_1	Type_2	ENST00000403660.3	ENST00000622237.4	ORF_seq_similarity	Complete ORF gain
ROM1	Naevi	Mel	ENST00000278833.3	ENST00000534093.5	intron_retention	Intron retention gain		CEACAM19	Type_1	Type_2	ENST00000403660.3	ENST00000622237.4	domains_identified	Domain gain
ROM1	Naevi	Mel	ENST00000278833.3	ENST00000534093.5	ORF_seq_similarity	ORF is longer		SIDT1	Type_1	Type_2	ENST00000264852.8	ENST00000498152.1	coding_potential	Transcript is coding
ROM1	Naevi	Mel	ENST00000278833.3	ENST00000534093.5	domains_identified	Domain gain		SIDT1	Type_1	Type_2	ENST00000264852.8	ENST00000498152.1	ORF_seq_similarity	Complete ORF gain
ANOS1	Naevi	Mel	ENST00000488294.1	ENST00000262648.8	coding_potential	Transcript is Noncoding		SIDT1	Type_1	Type_2	ENST00000264852.8	ENST00000498152.1	domains_identified	Domain gain
ANOS1	Naevi	Mel	ENST00000488294.1	ENST00000262648.8	ORF_seq_similarity	Complete ORF loss		INAVA	Type_1	Type_2	ENST00000413687.3	ENST00000531649.1	intron_retention	Intron retention gain
ANOS1	Naevi	Mel	ENST00000488294.1	ENST00000262648.8	domains_identified	Domain loss		INAVA	Type_1	Type_2	ENST00000413687.3	ENST00000531649.1	coding_potential	Transcript is coding
MAPKAP1	Naevi	Mel	ENST00000444226.1	ENST00000373498.5	coding_potential	Transcript is Noncoding		INAVA	Type_1	Type_2	ENST00000413687.3	ENST00000531649.1	ORF_seq_similarity	Complete ORF gain
MAPKAP1	Naevi	Mel	ENST00000444226.1	ENST00000373498.5	ORF_seq_similarity	Complete ORF loss		INAVA	Type_1	Type_2	ENST00000413687.3	ENST00000531649.1	domains_identified	Domain gain
MAPKAP1	Naevi	Mel	ENST00000444226.1	ENST00000373498.5	domains_identified	Domain loss		LINC01547	Type_1	Type_2	ENST00000330551.3	ENST00000667826.1	intron_retention	Intron retention loss
NUDT21	Naevi	Mel	ENST00000566340.5	ENST00000300291.10	coding_potential	Transcript is Noncoding		LINC01547	Type_1	Type_2	ENST00000660377.1	ENST00000667826.1	intron_retention	Intron retention loss
NUDT21	Naevi	Mel	ENST00000566340.5	ENST00000300291.10	ORF_seq_similarity	Complete ORF loss		PIP5KL1	Type_1	Type_2	ENST00000300432.3	ENST00000476624.1	intron_retention	Intron retention gain
NUDT21	Naevi	Mel	ENST00000566340.5	ENST00000300291.10	domains_identified	Domain loss		PIP5KL1	Type_1	Type_2	ENST00000300432.3	ENST00000476624.1	coding_potential	Transcript is coding
ZDHHC15	Naevi	Mel	ENST00000482827.1	ENST00000373367.8	coding_potential	Transcript is Noncoding		PIP5KL1	Type_1	Type_2	ENST00000300432.3	ENST00000476624.1	ORF_seq_similarity	Complete ORF gain
ZDHHC15	Naevi	Mel	ENST00000482827.1	ENST00000373367.8	ORF_seq_similarity	Complete ORF loss		PIP5KL1	Type_1	Type_2	ENST00000300432.3	ENST00000476624.1	domains_identified	Domain gain
ZDHHC15	Naevi	Mel	ENST00000482827.1	ENST00000373367.8	domains_identified	Domain loss		DOK1	Type_1	Type_2	ENST00000340004.6	ENST00000233668.9	ORF_seq_similarity	ORF is shorter
DPF1	Naevi	Mel	ENST00000412732.5	ENST00000473716.5	intron_retention	Intron retention loss		DOK1	Type_1	Type_2	ENST00000340004.6	ENST00000233668.9	domains_identified	Domain loss
DPF1	Naevi	Mel	ENST00000412732.5	ENST00000473716.5	coding_potential	Transcript is coding		DOK1	Type_1	Type_2	ENST00000340004.6	ENST00000409429.5	ORF_seq_similarity	ORF is shorter
DPF1	Naevi	Mel	ENST00000412732.5	ENST00000473716.5	ORF_seq_similarity	Complete ORF gain		DOK1	Type_1	Type_2	ENST00000340004.6	ENST00000409429.5	domains_identified	Domain switch
DPF1	Naevi	Mel	ENST00000412732.5	ENST00000473716.5	domains_identified	Domain gain		DOK1	Type_1	Type_2	ENST00000464613.1	ENST00000233668.9	ORF_seq_similarity	Complete ORF loss
DPF1	Naevi	Mel	ENST00000614244.4	ENST00000473716.5	intron_retention	Intron retention loss		DOK1	Type_1	Type_2	ENST00000464613.1	ENST00000233668.9	domains_identified	Domain loss
DPF1	Naevi	Mel	ENST00000614244.4	ENST00000473716.5	coding_potential	Transcript is coding		DOK1	Type_1	Type_2	ENST00000464613.1	ENST00000409429.5	ORF_seq_similarity	Complete ORF loss
DPF1	Naevi	Mel	ENST00000614244.4	ENST00000473716.5	ORF_seq_similarity	Complete ORF gain		DOK1	Type_1	Type_2	ENST00000464613.1	ENST00000409429.5	domains_identified	Domain loss
DPF1	Naevi	Mel	ENST00000614244.4	ENST00000473716.5	domains_identified	Domain gain		SCNN1A	Type_1	Type_2	ENST00000228916.7	ENST00000457871.2	intron_retention	Intron retention gain
SLIT3	Naevi	Mel	ENST00000332966.8	ENST00000404867.7	domains_identified	Domain gain		SCNN1A	Type_1	Type_2	ENST00000228916.7	ENST00000457871.2	coding_potential	Transcript is coding
TMED10	Naevi	Mel	ENST00000557670.5	ENST00000303575.9	coding_potential	Transcript is Noncoding		SCNN1A	Type_1	Type_2	ENST00000228916.7	ENST00000457871.2	ORF_seq_similarity	Complete ORF gain
TMED10	Naevi	Mel	ENST00000557670.5	ENST00000303575.9	ORF_seq_similarity	Complete ORF loss		SCNN1A	Type_1	Type_2	ENST00000228916.7	ENST00000457871.2	domains_identified	Domain gain
TMED10	Naevi	Mel	ENST00000557670.5	ENST00000303575.9	domains_identified	Domain loss		RGL4	Type_1	Type_2	ENST00000452208.1	ENST00000401461.5	intron_retention	Intron retention switch
TFEC	Naevi	Mel	ENST00000484212.5	ENST00000457268.5	ORF_seq_similarity	ORF is longer		RGL4	Type_1	Type_2	ENST00000452208.1	ENST00000401461.5	ORF_seq_similarity	Complete ORF loss
TFEC	Naevi	Mel	ENST00000484212.5	ENST00000457268.5	domains_identified	Domain loss		RGL4	Type_1	Type_2	ENST00000452208.1	ENST00000401461.5	domains_identified	Domain loss
ERP29	Naevi	Mel	ENST00000261735.4	ENST00000455836.1	ORF_seq_similarity	ORF is longer		RGL4	Type_1	Type_2	ENST00000452208.1	ENST00000460167.1	intron_retention	Intron retention gain
ERP29	Naevi	Mel	ENST00000261735.4	ENST00000455836.1	domains_identified	Domain gain		RGL4	Type_1	Type_2	ENST00000452208.1	ENST00000460167.1	coding_potential	Transcript is coding
TMEM106B	Naevi	Mel	ENST00000462754.1	ENST00000396668.8	coding_potential	Transcript is Noncoding		BLK	Type_1	Type_2	ENST00000259089.9	ENST00000526097.1	ORF_seq_similarity	Complete ORF gain
TMEM106B	Naevi	Mel	ENST00000462754.1	ENST00000396668.8	ORF_seq_similarity	Complete ORF loss		BLK	Type_1	Type_2	ENST00000259089.9	ENST00000526097.1	domains_identified	Domain gain
TMEM106B	Naevi	Mel	ENST00000462754.1	ENST00000396668.8	domains_identified	Domain loss		STARD8	Type_1	Type_2	ENST00000374597.3	ENST00000488088.1	coding_potential	Transcript is coding
TP53RK	Naevi	Mel	ENST00000372102.3	ENST00000372114.4	ORF_seq_similarity	ORF is shorter		STARD8	Type_1	Type_2	ENST00000374597.3	ENST00000488088.1	ORF_seq_similarity	Complete ORF gain
TP53RK	Naevi	Mel	ENST00000372102.3	ENST00000372114.4	domains_identified	Domain loss		STARD8	Type_1	Type_2	ENST00000374597.3	ENST00000488088.1	domains_identified	Domain gain
GRK3	Naevi	Mel	ENST00000619906.4	ENST00000324198.11	intron_retention	Intron retention loss		SAMD3	Type_1	Type_2	ENST00000439090.7	ENST00000529119.1	coding_potential	Transcript is coding
GRK3	Naevi	Mel	ENST00000619906.4	ENST00000324198.11	ORF_seq_similarity	ORF is shorter		SAMD3	Type_1	Type_2	ENST00000439090.7	ENST00000529119.1	ORF_seq_similarity	Complete ORF gain
GRK3	Naevi	Mel	ENST00000619906.4	ENST00000324198.11	NMD_status	NMD sensitive		SAMD3	Type_1	Type_2	ENST00000439090.7	ENST00000529119.1	domains_identified	Domain gain
GRK3	Naevi	Mel	ENST00000619906.4	ENST00000324198.11	domains_identified	Domain loss		PRSS8	Type_1	Type_2	ENST00000317508.11	ENST00000567833.1	coding_potential	Transcript is coding
RRM2	Naevi	Mel	ENST00000652660.1	ENST00000646978.1	coding_potential	Transcript is coding		PRSS8	Type_1	Type_2	ENST00000317508.11	ENST00000567833.1	ORF_seq_similarity	Complete ORF gain
ASPHD1	Naevi	Mel	ENST00000308748.10	ENST00000566693.1	intron_retention	Intron retention gain		PRSS8	Type_1	Type_2	ENST00000317508.11	ENST00000567833.1	domains_identified	Domain gain
ASPHD1	Naevi	Mel	ENST00000308748.10	ENST00000566693.1	NMD_status	NMD insensitive		STK17A	Type_1	Type_2	ENST00000648544.1	ENST00000474211.1	intron_retention	Intron retention loss
TM4SF19	Naevi	Mel	ENST00000273695.3	ENST00000446879.5	ORF_seq_similarity	ORF is shorter		STK17A	Type_1	Type_2	ENST00000648544.1	ENST00000474211.1	ORF_seq_similarity	Complete ORF gain
TM4SF19	Naevi	Mel	ENST00000454715.5	ENST00000446879.5	ORF_seq_similarity	ORF is shorter		STK17A	Type_1	Type_2	ENST00000648544.1	ENST00000474211.1	domains_identified	Domain gain
TM4SF19	Naevi	Mel	ENST00000454715.5	ENST00000446879.5	domains_identified	Domain gain		FCGR2A	Type_1	Type_2	ENST00000271450.10	ENST00000461298.1	coding_potential	Transcript is coding
ORC6	Naevi	Mel	ENST00000219097.7	ENST00000569239.5	coding_potential	Transcript is coding		FCGR2A	Type_1	Type_2	ENST00000271450.10	ENST00000461298.1	ORF_seq_similarity	Complete ORF gain
ORC6	Naevi	Mel	ENST00000219097.7	ENST00000569239.5	ORF_seq_similarity	Complete ORF gain		FCGR2A	Type_1	Type_2	ENST00000271450.10	ENST00000461298.1	domains_identified	Domain gain
ORC6	Naevi	Mel	ENST00000219097.7	ENST00000569239.5	domains_identified	Domain gain		STARD10	Type_1	Type_2	ENST00000543304.5	ENST00000334805.10	intron_retention	Intron retention loss
CD274	Naevi	Mel	ENST00000474218.1	ENST00000381573.8	coding_potential	Transcript is Noncoding		LTB4R2	Type_1	Type_2	ENST00000533293.2	ENST00000528054.1	intron_retention	Intron retention loss
CD274	Naevi	Mel	ENST00000474218.1	ENST00000381573.8	ORF_seq_similarity	Complete ORF loss		ZBP1	Type_1	Type_2	ENST00000395822.7	ENST00000453793.1	coding_potential	Transcript is coding
CD274	Naevi	Mel	ENST00000474218.1	ENST00000381573.8	domains_identified	Domain loss		ZBP1	Type_1	Type_2	ENST00000395822.7	ENST00000453793.1	ORF_seq_similarity	Complete ORF gain
AC245297.1	Naevi	Mel	ENST00000663163.1	ENST00000313342.8	coding_potential	Transcript is Noncoding		ZBP1	Type_1	Type_2	ENST00000395822.7	ENST00000453793.1	domains_identified	Domain gain
ZBTB16	Naevi	Mel	ENST00000541602.5	ENST00000335953.9	ORF_seq_similarity	Complete ORF loss		FXYD3	Type_1	Type_2	ENST00000604621.5	ENST00000603181.5	coding_potential	Transcript is Noncoding
ZBTB16	Naevi	Mel	ENST00000541602.5	ENST00000335953.9	domains_identified	Domain loss		FXYD3	Type_1	Type_2	ENST00000604621.5	ENST00000603181.5	ORF_seq_similarity	Complete ORF loss
ZNF616	Naevi	Mel	ENST00000600282.1	ENST00000600228.6	coding_potential	Transcript is Noncoding		FXYD3	Type_1	Type_2	ENST00000604621.5	ENST00000603181.5	domains_identified	Domain loss
ZNF616	Naevi	Mel	ENST00000600282.1	ENST00000600228.6	ORF_seq_similarity	Complete ORF loss		ARG1	Type_1	Type_2	ENST00000368087.8	ENST00000469293.1	coding_potential	Transcript is coding
ZNF616	Naevi	Mel	ENST00000600282.1	ENST00000600228.6	domains_identified	Domain loss		ARG1	Type_1	Type_2	ENST00000368087.8	ENST00000469293.1	ORF_seq_similarity	Complete ORF gain
CNTNAP3	Naevi	Mel	ENST00000469061.1	ENST00000297668.10	coding_potential	Transcript is Noncoding		ARG1	Type_1	Type_2	ENST00000368087.8	ENST00000469293.1	domains_identified	Domain gain
CNTNAP3	Naevi	Mel	ENST00000469061.1	ENST00000297668.10	ORF_seq_similarity	Complete ORF loss		ATP8B1	Type_1	Type_2	ENST00000648908.1	ENST00000588255.1	intron_retention	Intron retention gain
CNTNAP3	Naevi	Mel	ENST00000469061.1	ENST00000297668.10	domains_identified	Domain loss		ATP8B1	Type_1	Type_2	ENST00000648908.1	ENST00000588255.1	coding_potential	Transcript is coding
HAMP	Naevi	Mel	ENST00000222304.5	ENST00000593580.1	intron_retention	Intron retention loss		ATP8B1	Type_1	Type_2	ENST00000648908.1	ENST00000588255.1	ORF_seq_similarity	Complete ORF gain
CDC25C	Naevi	Mel	ENST00000323760.11	ENST00000348983.7	ORF_seq_similarity	ORF is longer		ATP8B1	Type_1	Type_2	ENST00000648908.1	ENST00000588255.1	domains_identified	Domain gain
CPSF6	Naevi	Mel	ENST00000456847.7	ENST00000435070.7	ORF_seq_similarity	ORF is shorter		IGSF6	Type_1	Type_2	ENST00000268389.6	ENST00000565499.1	ORF_seq_similarity	Complete ORF gain
IKBKE	Naevi	Mel	ENST00000579827.6	ENST00000581977.7	ORF_seq_similarity	ORF is shorter		IGSF6	Type_1	Type_2	ENST00000268389.6	ENST00000565499.1	domains_identified	Domain gain
IKBKE	Naevi	Mel	ENST00000579827.6	ENST00000581977.7	domains_identified	Domain loss		NPR3	Type_1	Type_2	ENST00000326958.5	ENST00000507141.1	coding_potential	Transcript is coding
GPN2	Naevi	Mel	ENST00000374133.3	ENST00000374135.9	intron_retention	Intron retention loss		NPR3	Type_1	Type_2	ENST00000326958.5	ENST00000507141.1	ORF_seq_similarity	Complete ORF gain
GPN2	Naevi	Mel	ENST00000374133.3	ENST00000374135.9	ORF_seq_similarity	ORF is shorter		NPR3	Type_1	Type_2	ENST00000326958.5	ENST00000507141.1	domains_identified	Domain gain
AIM2	Naevi	Mel	ENST00000368130.9	ENST00000368129.3	coding_potential	Transcript is coding		LIME1	Type_1	Type_2	ENST00000309546.8	ENST00000621325.1	intron_retention	Intron retention loss
AIM2	Naevi	Mel	ENST00000368130.9	ENST00000368129.3	ORF_seq_similarity	Complete ORF gain		LIME1	Type_1	Type_2	ENST00000309546.8	ENST00000621325.1	ORF_seq_similarity	Complete ORF gain
AIM2	Naevi	Mel	ENST00000368130.9	ENST00000368129.3	domains_identified	Domain gain		LIME1	Type_1	Type_2	ENST00000309546.8	ENST00000621325.1	domains_identified	Domain gain
AIM2	Naevi	Mel	ENST00000368130.9	ENST00000411768.1	intron_retention	Intron retention gain		ANK3	Type_1	Type_2	ENST00000373827.6	ENST00000280772.7	ORF_seq_similarity	ORF is shorter
AIM2	Naevi	Mel	ENST00000368130.9	ENST00000411768.1	coding_potential	Transcript is coding		ANK3	Type_1	Type_2	ENST00000373827.6	ENST00000280772.7	domains_identified	Domain switch
AIM2	Naevi	Mel	ENST00000368130.9	ENST00000411768.1	ORF_seq_similarity	Complete ORF gain		GALNT15	Type_1	Type_2	ENST00000339732.10	ENST00000650034.1	intron_retention	Intron retention gain
AIM2	Naevi	Mel	ENST00000368130.9	ENST00000411768.1	domains_identified	Domain gain		GALNT15	Type_1	Type_2	ENST00000339732.10	ENST00000650034.1	coding_potential	Transcript is coding
GGCX	Naevi	Mel	ENST00000496962.1	ENST00000233838.9	ORF_seq_similarity	Complete ORF loss		GALNT15	Type_1	Type_2	ENST00000339732.10	ENST00000650034.1	ORF_seq_similarity	Complete ORF gain
GGCX	Naevi	Mel	ENST00000496962.1	ENST00000233838.9	domains_identified	Domain loss		GALNT15	Type_1	Type_2	ENST00000339732.10	ENST00000650034.1	domains_identified	Domain gain
DKKL1	Naevi	Mel	ENST00000594268.1	ENST00000221498.7	intron_retention	Intron retention loss		GRHL2	Type_1	Type_2	ENST00000646743.1	ENST00000472106.2	ORF_seq_similarity	Complete ORF gain
DKKL1	Naevi	Mel	ENST00000594268.1	ENST00000221498.7	coding_potential	Transcript is Noncoding		GRHL2	Type_1	Type_2	ENST00000646743.1	ENST00000472106.2	domains_identified	Domain gain
DKKL1	Naevi	Mel	ENST00000594268.1	ENST00000221498.7	ORF_seq_similarity	Complete ORF loss		PRRT3	Type_1	Type_2	ENST00000412055.6	ENST00000411976.2	intron_retention	Intron retention gain
FCRL3	Naevi	Mel	ENST00000368184.8	ENST00000457799.1	intron_retention	Intron retention gain		PRRT3	Type_1	Type_2	ENST00000412055.6	ENST00000411976.2	ORF_seq_similarity	ORF is longer
FCRL3	Naevi	Mel	ENST00000368184.8	ENST00000457799.1	coding_potential	Transcript is coding		MATK	Type_1	Type_2	ENST00000395040.6	ENST00000590821.1	coding_potential	Transcript is coding
FCRL3	Naevi	Mel	ENST00000368184.8	ENST00000457799.1	ORF_seq_similarity	Complete ORF gain		MATK	Type_1	Type_2	ENST00000395040.6	ENST00000590821.1	ORF_seq_similarity	Complete ORF gain
FCRL3	Naevi	Mel	ENST00000368184.8	ENST00000457799.1	domains_identified	Domain gain		MATK	Type_1	Type_2	ENST00000395040.6	ENST00000590821.1	domains_identified	Domain gain
BOLA2	Naevi	Mel	ENST00000330978.3	ENST00000380596.9	NMD_status	NMD insensitive		BARX2	Type_1	Type_2	ENST00000281437.6	ENST00000605151.1	coding_potential	Transcript is coding
LDLRAD2	Naevi	Mel	ENST00000344642.7	ENST00000484271.1	coding_potential	Transcript is coding		BARX2	Type_1	Type_2	ENST00000281437.6	ENST00000605151.1	ORF_seq_similarity	Complete ORF gain
LDLRAD2	Naevi	Mel	ENST00000344642.7	ENST00000484271.1	ORF_seq_similarity	Complete ORF gain		BARX2	Type_1	Type_2	ENST00000281437.6	ENST00000605151.1	domains_identified	Domain gain
LDLRAD2	Naevi	Mel	ENST00000344642.7	ENST00000484271.1	domains_identified	Domain gain		CREB3L1	Type_1	Type_2	ENST00000621158.5	ENST00000534616.5	coding_potential	Transcript is coding
LANCL2	Naevi	Mel	ENST00000452107.6	ENST00000254770.2	ORF_seq_similarity	ORF is shorter		CREB3L1	Type_1	Type_2	ENST00000621158.5	ENST00000534616.5	ORF_seq_similarity	Complete ORF gain
LANCL2	Naevi	Mel	ENST00000452107.6	ENST00000254770.2	NMD_status	NMD sensitive		CREB3L1	Type_1	Type_2	ENST00000621158.5	ENST00000534616.5	domains_identified	Domain gain
LANCL2	Naevi	Mel	ENST00000452107.6	ENST00000254770.2	domains_identified	Domain loss		ACAP1	Type_1	Type_2	ENST00000158762.8	ENST00000575415.1	coding_potential	Transcript is coding
REPS2	Naevi	Mel	ENST00000469714.1	ENST00000357277.8	ORF_seq_similarity	Complete ORF loss		ACAP1	Type_1	Type_2	ENST00000158762.8	ENST00000575415.1	ORF_seq_similarity	Complete ORF gain
REPS2	Naevi	Mel	ENST00000469714.1	ENST00000357277.8	domains_identified	Domain loss		ACAP1	Type_1	Type_2	ENST00000158762.8	ENST00000575415.1	domains_identified	Domain gain
NT5E	Naevi	Mel	ENST00000369646.7	ENST00000257770.8	ORF_seq_similarity	ORF is shorter		ALOX12	Type_1	Type_2	ENST00000251535.11	ENST00000480801.1	coding_potential	Transcript is coding
NT5E	Naevi	Mel	ENST00000369646.7	ENST00000257770.8	domains_identified	Domain loss		ALOX12	Type_1	Type_2	ENST00000251535.11	ENST00000480801.1	ORF_seq_similarity	Complete ORF gain
TMEM38A	Naevi	Mel	ENST00000595452.1	ENST00000187762.7	coding_potential	Transcript is Noncoding		ALOX12	Type_1	Type_2	ENST00000251535.11	ENST00000480801.1	domains_identified	Domain gain
TMEM38A	Naevi	Mel	ENST00000595452.1	ENST00000187762.7	ORF_seq_similarity	Complete ORF loss		DENND1C	Type_1	Type_2	ENST00000381480.7	ENST00000590444.5	intron_retention	Intron retention loss
TMEM38A	Naevi	Mel	ENST00000595452.1	ENST00000187762.7	domains_identified	Domain loss		DENND1C	Type_1	Type_2	ENST00000381480.7	ENST00000590444.5	ORF_seq_similarity	Complete ORF gain
PTPRH	Naevi	Mel	ENST00000376350.8	ENST00000263434.5	ORF_seq_similarity	ORF is longer		DENND1C	Type_1	Type_2	ENST00000381480.7	ENST00000590444.5	domains_identified	Domain gain
PTPRH	Naevi	Mel	ENST00000376350.8	ENST00000263434.5	domains_identified	Domain gain		DENND1C	Type_1	Type_2	ENST00000591795.1	ENST00000590444.5	intron_retention	Intron retention gain
IL10	Naevi	Mel	ENST00000423557.1	ENST00000640756.1	coding_potential	Transcript is coding		DENND1C	Type_1	Type_2	ENST00000591795.1	ENST00000590444.5	coding_potential	Transcript is Noncoding
IL10	Naevi	Mel	ENST00000423557.1	ENST00000640756.1	ORF_seq_similarity	Complete ORF gain		GABRP	Type_1	Type_2	ENST00000265294.9	ENST00000519196.5	coding_potential	Transcript is coding
IL10	Naevi	Mel	ENST00000423557.1	ENST00000640756.1	domains_identified	Domain gain		GABRP	Type_1	Type_2	ENST00000265294.9	ENST00000519196.5	ORF_seq_similarity	Complete ORF gain
MYBL1	Naevi	Mel	ENST00000522677.7	ENST00000523304.1	coding_potential	Transcript is coding		GABRP	Type_1	Type_2	ENST00000265294.9	ENST00000519196.5	domains_identified	Domain gain
MYBL1	Naevi	Mel	ENST00000522677.7	ENST00000523304.1	ORF_seq_similarity	Complete ORF gain		KLHL6	Type_1	Type_2	ENST00000468734.1	ENST00000487643.1	coding_potential	Transcript is coding
MYBL1	Naevi	Mel	ENST00000522677.7	ENST00000523304.1	domains_identified	Domain gain		KLHL6	Type_1	Type_2	ENST00000468734.1	ENST00000487643.1	ORF_seq_similarity	Complete ORF gain
WARS	Naevi	Mel	ENST00000392882.7	ENST00000358655.8	domains_identified	Domain gain		KLHL6	Type_1	Type_2	ENST00000468734.1	ENST00000487643.1	domains_identified	Domain gain
CITED1	Naevi	Mel	ENST00000373619.7	ENST00000417400.1	intron_retention	Intron retention gain		IL2RB	Type_1	Type_2	ENST00000216223.10	ENST00000461607.5	coding_potential	Transcript is coding
CITED1	Naevi	Mel	ENST00000373619.7	ENST00000417400.1	coding_potential	Transcript is coding		IL2RB	Type_1	Type_2	ENST00000216223.10	ENST00000461607.5	ORF_seq_similarity	Complete ORF gain
CITED1	Naevi	Mel	ENST00000373619.7	ENST00000417400.1	ORF_seq_similarity	Complete ORF gain		IL2RB	Type_1	Type_2	ENST00000216223.10	ENST00000461607.5	domains_identified	Domain gain
CITED1	Naevi	Mel	ENST00000373619.7	ENST00000417400.1	domains_identified	Domain gain		HIVEP2	Type_1	Type_2	ENST00000367603.8	ENST00000474532.1	coding_potential	Transcript is coding
CITED1	Naevi	Mel	ENST00000445983.5	ENST00000417400.1	intron_retention	Intron retention gain		HIVEP2	Type_1	Type_2	ENST00000367603.8	ENST00000474532.1	ORF_seq_similarity	Complete ORF gain
CITED1	Naevi	Mel	ENST00000445983.5	ENST00000417400.1	coding_potential	Transcript is coding		HIVEP2	Type_1	Type_2	ENST00000367603.8	ENST00000474532.1	domains_identified	Domain gain
CITED1	Naevi	Mel	ENST00000445983.5	ENST00000417400.1	ORF_seq_similarity	Complete ORF gain		BCAS4	Type_1	Type_2	ENST00000463943.1	ENST00000371608.6	ORF_seq_similarity	ORF is shorter
CITED1	Naevi	Mel	ENST00000445983.5	ENST00000417400.1	domains_identified	Domain gain		BCAS4	Type_1	Type_2	ENST00000463943.1	ENST00000371608.6	NMD_status	NMD sensitive
STARD5	Naevi	Mel	ENST00000325346.6	ENST00000302824.7	intron_retention	Intron retention loss		FUT1	Type_1	Type_2	ENST00000645652.1	ENST00000599826.5	intron_retention	Intron retention loss
STARD5	Naevi	Mel	ENST00000325346.6	ENST00000302824.7	coding_potential	Transcript is Noncoding		FUT1	Type_1	Type_2	ENST00000645652.1	ENST00000599826.5	coding_potential	Transcript is coding
STARD5	Naevi	Mel	ENST00000325346.6	ENST00000302824.7	ORF_seq_similarity	Complete ORF loss		FUT1	Type_1	Type_2	ENST00000645652.1	ENST00000599826.5	ORF_seq_similarity	Complete ORF gain
STARD5	Naevi	Mel	ENST00000325346.6	ENST00000302824.7	domains_identified	Domain loss		FUT1	Type_1	Type_2	ENST00000645652.1	ENST00000599826.5	domains_identified	Domain gain
UBE2K	Naevi	Mel	ENST00000510719.1	ENST00000261427.10	intron_retention	Intron retention loss		KLRK1	Type_1	Type_2	ENST00000240618.11	ENST00000544449.5	intron_retention	Intron retention loss
UBE2K	Naevi	Mel	ENST00000510719.1	ENST00000261427.10	coding_potential	Transcript is Noncoding		KLRK1	Type_1	Type_2	ENST00000240618.11	ENST00000544449.5	coding_potential	Transcript is coding
UBE2K	Naevi	Mel	ENST00000510719.1	ENST00000261427.10	ORF_seq_similarity	Complete ORF loss		KLRK1	Type_1	Type_2	ENST00000240618.11	ENST00000544449.5	ORF_seq_similarity	Complete ORF gain
UBE2K	Naevi	Mel	ENST00000510719.1	ENST00000261427.10	domains_identified	Domain loss		KLRK1	Type_1	Type_2	ENST00000240618.11	ENST00000544449.5	domains_identified	Domain gain
GAGE1	Naevi	Mel	ENST00000610680.4	ENST00000619375.1	coding_potential	Transcript is coding		SLC16A3	Type_1	Type_2	ENST00000582743.5	ENST00000583025.1	ORF_seq_similarity	ORF is longer
GAGE1	Naevi	Mel	ENST00000610680.4	ENST00000619375.1	ORF_seq_similarity	Complete ORF gain		VGLL3	Type_1	Type_2	ENST00000398399.7	ENST00000637106.1	intron_retention	Intron retention gain
GAGE1	Naevi	Mel	ENST00000610680.4	ENST00000619375.1	domains_identified	Domain gain		VGLL3	Type_1	Type_2	ENST00000398399.7	ENST00000637106.1	coding_potential	Transcript is coding
CYP4F12	Naevi	Mel	ENST00000546792.5	ENST00000550627.5	intron_retention	Intron retention loss		VGLL3	Type_1	Type_2	ENST00000398399.7	ENST00000637106.1	ORF_seq_similarity	Complete ORF gain
CYP4F12	Naevi	Mel	ENST00000546792.5	ENST00000550627.5	coding_potential	Transcript is Noncoding		VGLL3	Type_1	Type_2	ENST00000398399.7	ENST00000637106.1	domains_identified	Domain gain
FCGR3A	Naevi	Mel	ENST00000436743.5	ENST00000426740.6	ORF_seq_similarity	ORF is shorter		CRB3	Type_1	Type_2	ENST00000600229.6	ENST00000598494.5	coding_potential	Transcript is coding
ATG5	Naevi	Mel	ENST00000646025.1	ENST00000369076.8	ORF_seq_similarity	ORF is shorter		CRB3	Type_1	Type_2	ENST00000600229.6	ENST00000598494.5	ORF_seq_similarity	Complete ORF gain
ATG5	Naevi	Mel	ENST00000646025.1	ENST00000369076.8	NMD_status	NMD sensitive		FCRL3	Type_1	Type_2	ENST00000368184.8	ENST00000457799.1	intron_retention	Intron retention gain
C3orf52	Naevi	Mel	ENST00000264848.9	ENST00000431717.6	ORF_seq_similarity	ORF is shorter		FCRL3	Type_1	Type_2	ENST00000368184.8	ENST00000457799.1	coding_potential	Transcript is coding
C3orf52	Naevi	Mel	ENST00000264848.9	ENST00000467942.2	coding_potential	Transcript is coding		FCRL3	Type_1	Type_2	ENST00000368184.8	ENST00000457799.1	ORF_seq_similarity	Complete ORF gain
C3orf52	Naevi	Mel	ENST00000264848.9	ENST00000467942.2	ORF_seq_similarity	Complete ORF gain		FCRL3	Type_1	Type_2	ENST00000368184.8	ENST00000457799.1	domains_identified	Domain gain
SLC7A8	Naevi	Mel	ENST00000316902.12	ENST00000422941.6	ORF_seq_similarity	ORF is longer		LDLR	Type_1	Type_2	ENST00000252444.9	ENST00000558528.1	intron_retention	Intron retention gain
KIF20A	Naevi	Mel	ENST00000394894.8	ENST00000503417.1	ORF_seq_similarity	Complete ORF gain		LDLR	Type_1	Type_2	ENST00000252444.9	ENST00000558528.1	coding_potential	Transcript is coding
KIF20A	Naevi	Mel	ENST00000394894.8	ENST00000503417.1	domains_identified	Domain gain		IL18BP	Type_1	Type_2	ENST00000260049.9	ENST00000497194.6	intron_retention	Intron retention loss
FBXO5	Naevi	Mel	ENST00000229758.8	ENST00000367241.3	ORF_seq_similarity	ORF is longer		EGLN3	Type_1	Type_2	ENST00000250457.8	ENST00000464521.6	coding_potential	Transcript is coding
CD19	Naevi	Mel	ENST00000538922.7	ENST00000567368.1	ORF_seq_similarity	Complete ORF gain		EGLN3	Type_1	Type_2	ENST00000250457.8	ENST00000464521.6	ORF_seq_similarity	Complete ORF gain
CD19	Naevi	Mel	ENST00000565089.5	ENST00000567368.1	intron_retention	Intron retention gain		EGLN3	Type_1	Type_2	ENST00000250457.8	ENST00000464521.6	domains_identified	Domain gain
MRPL35	Naevi	Mel	ENST00000409180.1	ENST00000337109.9	intron_retention	Intron retention loss		KLK11	Type_1	Type_2	ENST00000453757.8	ENST00000594827.5	intron_retention	Intron retention switch
ST20-MTHFS	Naevi	Mel	ENST00000479961.1	ENST00000494999.1	coding_potential	Transcript is coding		KLK11	Type_1	Type_2	ENST00000453757.8	ENST00000594827.5	coding_potential	Transcript is coding
ST20-MTHFS	Naevi	Mel	ENST00000479961.1	ENST00000494999.1	ORF_seq_similarity	Complete ORF gain		KLK11	Type_1	Type_2	ENST00000453757.8	ENST00000594827.5	ORF_seq_similarity	Complete ORF gain
ST20-MTHFS	Naevi	Mel	ENST00000479961.1	ENST00000494999.1	domains_identified	Domain gain		KLK11	Type_1	Type_2	ENST00000453757.8	ENST00000594827.5	domains_identified	Domain gain
TGM2	Naevi	Mel	ENST00000361475.7	ENST00000474777.1	ORF_seq_similarity	Complete ORF gain		TPRXL	Type_1	Type_2	ENST00000424053.5	ENST00000529129.6	intron_retention	Intron retention gain
TGM2	Naevi	Mel	ENST00000361475.7	ENST00000474777.1	domains_identified	Domain gain		TPRXL	Type_1	Type_2	ENST00000424053.5	ENST00000529129.6	coding_potential	Transcript is coding
ST6GALNAC5	Naevi	Mel	ENST00000480428.1	ENST00000318803.6	coding_potential	Transcript is Noncoding		TMEM79	Type_1	Type_2	ENST00000405535.3	ENST00000463670.5	intron_retention	Intron retention gain
ST6GALNAC5	Naevi	Mel	ENST00000480428.1	ENST00000318803.6	ORF_seq_similarity	Complete ORF loss		TMEM79	Type_1	Type_2	ENST00000405535.3	ENST00000463670.5	ORF_seq_similarity	Complete ORF gain
ST6GALNAC5	Naevi	Mel	ENST00000480428.1	ENST00000318803.6	domains_identified	Domain loss		CASQ2	Type_1	Type_2	ENST00000261448.5	ENST00000488931.1	coding_potential	Transcript is coding
ST6GALNAC5	Naevi	Mel	ENST00000480428.1	ENST00000477717.6	coding_potential	Transcript is Noncoding		CASQ2	Type_1	Type_2	ENST00000261448.5	ENST00000488931.1	ORF_seq_similarity	Complete ORF gain
ST6GALNAC5	Naevi	Mel	ENST00000480428.1	ENST00000477717.6	ORF_seq_similarity	Complete ORF loss		CASQ2	Type_1	Type_2	ENST00000261448.5	ENST00000488931.1	domains_identified	Domain gain
ST6GALNAC5	Naevi	Mel	ENST00000480428.1	ENST00000477717.6	domains_identified	Domain loss		SCIN	Type_1	Type_2	ENST00000519209.5	ENST00000436854.1	coding_potential	Transcript is coding
TCL1A	Naevi	Mel	ENST00000402399.6	ENST00000555202.1	intron_retention	Intron retention gain		SCIN	Type_1	Type_2	ENST00000519209.5	ENST00000436854.1	ORF_seq_similarity	Complete ORF gain
TCL1A	Naevi	Mel	ENST00000554012.5	ENST00000555202.1	intron_retention	Intron retention gain		SCIN	Type_1	Type_2	ENST00000519209.5	ENST00000436854.1	domains_identified	Domain gain
TCL1A	Naevi	Mel	ENST00000554012.5	ENST00000555202.1	coding_potential	Transcript is Noncoding		AKR1C2	Type_1	Type_2	ENST00000421196.7	ENST00000604428.5	coding_potential	Transcript is coding
TCL1A	Naevi	Mel	ENST00000554012.5	ENST00000555202.1	ORF_seq_similarity	Complete ORF loss		AKR1C2	Type_1	Type_2	ENST00000421196.7	ENST00000604428.5	ORF_seq_similarity	Complete ORF gain
TCL1A	Naevi	Mel	ENST00000554012.5	ENST00000555202.1	domains_identified	Domain loss		AKR1C2	Type_1	Type_2	ENST00000421196.7	ENST00000604428.5	domains_identified	Domain gain
DEPDC1	Naevi	Mel	ENST00000370966.9	ENST00000488146.5	intron_retention	Intron retention gain		ADORA2B	Type_1	Type_2	ENST00000304222.2	ENST00000582124.1	ORF_seq_similarity	Complete ORF gain
DEPDC1	Naevi	Mel	ENST00000370966.9	ENST00000488146.5	coding_potential	Transcript is coding		ADORA2B	Type_1	Type_2	ENST00000304222.2	ENST00000582124.1	domains_identified	Domain gain
DEPDC1	Naevi	Mel	ENST00000370966.9	ENST00000488146.5	ORF_seq_similarity	Complete ORF gain		HIVEP3	Type_1	Type_2	ENST00000460604.1	ENST00000489103.5	coding_potential	Transcript is coding
DEPDC1	Naevi	Mel	ENST00000370966.9	ENST00000488146.5	domains_identified	Domain gain		HIVEP3	Type_1	Type_2	ENST00000643665.1	ENST00000489103.5	coding_potential	Transcript is coding
FAM72B	Naevi	Mel	ENST00000369390.7	ENST00000355228.8	intron_retention	Intron retention gain		HIVEP3	Type_1	Type_2	ENST00000643665.1	ENST00000489103.5	ORF_seq_similarity	Complete ORF gain
FAM72B	Naevi	Mel	ENST00000369390.7	ENST00000355228.8	coding_potential	Transcript is coding		HIVEP3	Type_1	Type_2	ENST00000643665.1	ENST00000489103.5	domains_identified	Domain gain
FAM72B	Naevi	Mel	ENST00000369390.7	ENST00000355228.8	ORF_seq_similarity	Complete ORF gain		AP1M2	Type_1	Type_2	ENST00000250244.10	ENST00000589571.1	intron_retention	Intron retention gain
FAM72B	Naevi	Mel	ENST00000369390.7	ENST00000355228.8	domains_identified	Domain gain		AP1M2	Type_1	Type_2	ENST00000250244.10	ENST00000589571.1	coding_potential	Transcript is coding
DGKI	Naevi	Mel	ENST00000475388.1	ENST00000453654.6	coding_potential	Transcript is Noncoding		AP1M2	Type_1	Type_2	ENST00000250244.10	ENST00000589571.1	ORF_seq_similarity	Complete ORF gain
DGKI	Naevi	Mel	ENST00000475388.1	ENST00000453654.6	ORF_seq_similarity	Complete ORF loss		AP1M2	Type_1	Type_2	ENST00000250244.10	ENST00000589571.1	domains_identified	Domain gain
DGKI	Naevi	Mel	ENST00000475388.1	ENST00000453654.6	domains_identified	Domain loss		TSSK3	Type_1	Type_2	ENST00000373534.4	ENST00000574792.1	coding_potential	Transcript is coding
HRAS	Naevi	Mel	ENST00000311189.8	ENST00000482021.1	coding_potential	Transcript is coding		TSSK3	Type_1	Type_2	ENST00000373534.4	ENST00000574792.1	ORF_seq_similarity	Complete ORF gain
HRAS	Naevi	Mel	ENST00000311189.8	ENST00000482021.1	ORF_seq_similarity	Complete ORF gain		TSSK3	Type_1	Type_2	ENST00000373534.4	ENST00000574792.1	domains_identified	Domain gain
HRAS	Naevi	Mel	ENST00000311189.8	ENST00000482021.1	domains_identified	Domain gain		ASGR1	Type_1	Type_2	ENST00000269299.8	ENST00000573083.1	coding_potential	Transcript is coding
TKTL1	Naevi	Mel	ENST00000369912.2	ENST00000463884.1	intron_retention	Intron retention gain		ASGR1	Type_1	Type_2	ENST00000269299.8	ENST00000573083.1	ORF_seq_similarity	Complete ORF gain
TKTL1	Naevi	Mel	ENST00000369912.2	ENST00000463884.1	ORF_seq_similarity	Complete ORF gain		ASGR1	Type_1	Type_2	ENST00000269299.8	ENST00000573083.1	domains_identified	Domain gain
TKTL1	Naevi	Mel	ENST00000369912.2	ENST00000463884.1	domains_identified	Domain gain		ASGR1	Type_1	Type_2	ENST00000574330.5	ENST00000573083.1	intron_retention	Intron retention gain
ZNF592	Naevi	Mel	ENST00000559607.1	ENST00000560079.7	ORF_seq_similarity	ORF is shorter		ASGR1	Type_1	Type_2	ENST00000574330.5	ENST00000573083.1	coding_potential	Transcript is coding
ZNF592	Naevi	Mel	ENST00000559607.1	ENST00000560079.7	NMD_status	NMD sensitive		RRM2	Type_1	Type_2	ENST00000304567.10	ENST00000646978.1	coding_potential	Transcript is coding
ZNF592	Naevi	Mel	ENST00000559607.1	ENST00000560079.7	domains_identified	Domain loss		RRM2	Type_1	Type_2	ENST00000304567.10	ENST00000646978.1	ORF_seq_similarity	Complete ORF gain
CD79B	Naevi	Mel	ENST00000392795.7	ENST00000559358.1	ORF_seq_similarity	Complete ORF gain		RRM2	Type_1	Type_2	ENST00000304567.10	ENST00000646978.1	domains_identified	Domain gain
CD79B	Naevi	Mel	ENST00000392795.7	ENST00000559358.1	domains_identified	Domain gain		GINS3	Type_1	Type_2	ENST00000318129.5	ENST00000568468.5	intron_retention	Intron retention gain
FCRLA	Naevi	Mel	ENST00000236938.10	ENST00000367957.6	ORF_seq_similarity	ORF is longer		GINS3	Type_1	Type_2	ENST00000318129.5	ENST00000568468.5	coding_potential	Transcript is coding
FCRLA	Naevi	Mel	ENST00000236938.10	ENST00000367957.6	domains_identified	Domain gain		GINS3	Type_1	Type_2	ENST00000318129.5	ENST00000568468.5	ORF_seq_similarity	Complete ORF gain
ZNF318	Naevi	Mel	ENST00000361428.3	ENST00000606599.1	coding_potential	Transcript is coding		GINS3	Type_1	Type_2	ENST00000318129.5	ENST00000568468.5	domains_identified	Domain gain
ZNF318	Naevi	Mel	ENST00000361428.3	ENST00000606599.1	ORF_seq_similarity	Complete ORF gain		DNASE1L3	Type_1	Type_2	ENST00000394549.7	ENST00000483681.5	intron_retention	Intron retention loss
NPIPA7	Naevi	Mel	ENST00000344087.4	ENST00000530217.2	coding_potential	Transcript is Noncoding		ZNRD1ASP	Type_1	Type_2	ENST00000376797.7	ENST00000444051.1	intron_retention	Intron retention switch
NPIPA7	Naevi	Mel	ENST00000344087.4	ENST00000530217.2	ORF_seq_similarity	Complete ORF loss		MACROD1	Type_1	Type_2	ENST00000255681.7	ENST00000543422.5	intron_retention	Intron retention gain
NPIPA7	Naevi	Mel	ENST00000344087.4	ENST00000530217.2	domains_identified	Domain loss		MACROD1	Type_1	Type_2	ENST00000255681.7	ENST00000543422.5	coding_potential	Transcript is coding
CEMIP	Naevi	Mel	ENST00000220244.7	ENST00000495041.1	coding_potential	Transcript is coding		MACROD1	Type_1	Type_2	ENST00000255681.7	ENST00000543422.5	ORF_seq_similarity	Complete ORF gain
CEMIP	Naevi	Mel	ENST00000220244.7	ENST00000495041.1	ORF_seq_similarity	Complete ORF gain		MACROD1	Type_1	Type_2	ENST00000255681.7	ENST00000543422.5	domains_identified	Domain gain
CEMIP	Naevi	Mel	ENST00000220244.7	ENST00000495041.1	domains_identified	Domain gain		OSBPL6	Type_1	Type_2	ENST00000359685.7	ENST00000477097.1	coding_potential	Transcript is coding
SPOCD1	Naevi	Mel	ENST00000452755.6	ENST00000468720.5	coding_potential	Transcript is coding		OSBPL6	Type_1	Type_2	ENST00000359685.7	ENST00000477097.1	ORF_seq_similarity	Complete ORF gain
SPOCD1	Naevi	Mel	ENST00000452755.6	ENST00000468720.5	ORF_seq_similarity	Complete ORF gain		OSBPL6	Type_1	Type_2	ENST00000359685.7	ENST00000477097.1	domains_identified	Domain gain
SPOCD1	Naevi	Mel	ENST00000452755.6	ENST00000468720.5	domains_identified	Domain gain		BATF2	Type_1	Type_2	ENST00000301887.9	ENST00000435842.2	ORF_seq_similarity	ORF is longer
GTF2IRD2	Naevi	Mel	ENST00000614386.1	ENST00000451013.6	coding_potential	Transcript is Noncoding		BATF2	Type_1	Type_2	ENST00000301887.9	ENST00000435842.2	domains_identified	Domain gain
GTF2IRD2	Naevi	Mel	ENST00000614386.1	ENST00000451013.6	ORF_seq_similarity	Complete ORF loss		ASAP3	Type_1	Type_2	ENST00000495646.5	ENST00000449467.2	coding_potential	Transcript is coding
GTF2IRD2	Naevi	Mel	ENST00000614386.1	ENST00000451013.6	domains_identified	Domain loss		ASAP3	Type_1	Type_2	ENST00000495646.5	ENST00000449467.2	ORF_seq_similarity	Complete ORF gain
RCAN2	Naevi	Mel	ENST00000330430.10	ENST00000371374.5	ORF_seq_similarity	ORF is shorter		ASAP3	Type_1	Type_2	ENST00000495646.5	ENST00000449467.2	domains_identified	Domain gain
NDNF	Naevi	Mel	ENST00000506900.1	ENST00000379692.9	coding_potential	Transcript is Noncoding		TSSC2	Type_1	Type_2	ENST00000533775.5	ENST00000529482.5	intron_retention	Intron retention loss
NDNF	Naevi	Mel	ENST00000506900.1	ENST00000379692.9	ORF_seq_similarity	Complete ORF loss		SOX15	Type_1	Type_2	ENST00000250055.3	ENST00000538513.6	intron_retention	Intron retention gain
NDNF	Naevi	Mel	ENST00000506900.1	ENST00000379692.9	domains_identified	Domain loss		C22orf34	Type_1	Type_2	ENST00000405854.5	ENST00000414287.5	coding_potential	Transcript is coding
RUNX2	Naevi	Mel	ENST00000483243.5	ENST00000359524.7	coding_potential	Transcript is Noncoding		AZGP1P1	Type_1	Type_2	ENST00000411909.1	ENST00000425474.5	coding_potential	Transcript is coding
RUNX2	Naevi	Mel	ENST00000483243.5	ENST00000359524.7	ORF_seq_similarity	Complete ORF loss		SIMC1	Type_1	Type_2	ENST00000341199.10	ENST00000495423.1	ORF_seq_similarity	Complete ORF gain
RUNX2	Naevi	Mel	ENST00000483243.5	ENST00000359524.7	domains_identified	Domain loss		ATP10B	Type_1	Type_2	ENST00000642502.1	ENST00000517815.1	coding_potential	Transcript is coding
PILRA	Naevi	Mel	ENST00000350573.2	ENST00000474013.1	coding_potential	Transcript is coding		ATP10B	Type_1	Type_2	ENST00000642502.1	ENST00000517815.1	ORF_seq_similarity	Complete ORF gain
PILRA	Naevi	Mel	ENST00000350573.2	ENST00000474013.1	ORF_seq_similarity	Complete ORF gain		ATP10B	Type_1	Type_2	ENST00000642502.1	ENST00000517815.1	domains_identified	Domain gain
PILRA	Naevi	Mel	ENST00000350573.2	ENST00000474013.1	domains_identified	Domain gain		MFAP5	Type_1	Type_2	ENST00000359478.7	ENST00000543467.5	coding_potential	Transcript is coding
FMO1	Naevi	Mel	ENST00000402921.6	ENST00000617670.6	ORF_seq_similarity	ORF is shorter		MFAP5	Type_1	Type_2	ENST00000359478.7	ENST00000543467.5	ORF_seq_similarity	Complete ORF gain
ACADL	Naevi	Mel	ENST00000482502.1	ENST00000233710.4	coding_potential	Transcript is Noncoding		MFAP5	Type_1	Type_2	ENST00000359478.7	ENST00000543467.5	domains_identified	Domain gain
ACADL	Naevi	Mel	ENST00000482502.1	ENST00000233710.4	ORF_seq_similarity	Complete ORF loss		RGS13	Type_1	Type_2	ENST00000391995.6	ENST00000482095.1	intron_retention	Intron retention loss
ACADL	Naevi	Mel	ENST00000482502.1	ENST00000233710.4	domains_identified	Domain loss		SPIB	Type_1	Type_2	ENST00000270632.7	ENST00000439922.6	ORF_seq_similarity	ORF is longer
WSCD1	Naevi	Mel	ENST00000571494.1	ENST00000317744.9	ORF_seq_similarity	Complete ORF loss		SPIB	Type_1	Type_2	ENST00000270632.7	ENST00000439922.6	domains_identified	Domain loss
WSCD1	Naevi	Mel	ENST00000571494.1	ENST00000317744.9	domains_identified	Domain loss		SPIB	Type_1	Type_2	ENST00000270632.7	ENST00000594188.1	ORF_seq_similarity	Complete ORF gain
FOXD1	Naevi	Mel	ENST00000513595.1	ENST00000615637.3	coding_potential	Transcript is Noncoding		PYHIN1	Type_1	Type_2	ENST00000368140.6	ENST00000368135.4	ORF_seq_similarity	ORF is longer
FOXD1	Naevi	Mel	ENST00000513595.1	ENST00000615637.3	ORF_seq_similarity	Complete ORF loss		PYHIN1	Type_1	Type_2	ENST00000368140.6	ENST00000368135.4	domains_identified	Domain gain
FOXD1	Naevi	Mel	ENST00000513595.1	ENST00000615637.3	domains_identified	Domain loss		CLDN15	Type_1	Type_2	ENST00000308344.9	ENST00000401528.5	intron_retention	Intron retention gain
MKLN1	Naevi	Mel	ENST00000468830.1	ENST00000352689.11	coding_potential	Transcript is Noncoding		CHI3L2	Type_1	Type_2	ENST00000369748.9	ENST00000528451.5	coding_potential	Transcript is coding
MKLN1	Naevi	Mel	ENST00000468830.1	ENST00000352689.11	ORF_seq_similarity	Complete ORF loss		CHI3L2	Type_1	Type_2	ENST00000369748.9	ENST00000528451.5	ORF_seq_similarity	Complete ORF gain
MKLN1	Naevi	Mel	ENST00000468830.1	ENST00000352689.11	domains_identified	Domain loss		CHI3L2	Type_1	Type_2	ENST00000369748.9	ENST00000528451.5	domains_identified	Domain gain
SPP1	Naevi	Mel	ENST00000395080.8	ENST00000614857.4	intron_retention	Intron retention gain		CDRT4	Type_1	Type_2	ENST00000619038.5	ENST00000524205.3	coding_potential	Transcript is coding
IGSF9B	Naevi	Mel	ENST00000564347.1	ENST00000533871.7	coding_potential	Transcript is Noncoding		CDRT4	Type_1	Type_2	ENST00000619038.5	ENST00000524205.3	ORF_seq_similarity	Complete ORF gain
IGSF9B	Naevi	Mel	ENST00000564347.1	ENST00000533871.7	ORF_seq_similarity	Complete ORF loss		CDRT4	Type_1	Type_2	ENST00000619038.5	ENST00000524205.3	domains_identified	Domain gain
IGSF9B	Naevi	Mel	ENST00000564347.1	ENST00000533871.7	domains_identified	Domain loss		MFSD4A	Type_1	Type_2	ENST00000367147.9	ENST00000465651.1	coding_potential	Transcript is coding
CCND3	Naevi	Mel	ENST00000372991.8	ENST00000415497.6	coding_potential	Transcript is coding		MFSD4A	Type_1	Type_2	ENST00000367147.9	ENST00000465651.1	ORF_seq_similarity	Complete ORF gain
CCND3	Naevi	Mel	ENST00000372991.8	ENST00000415497.6	ORF_seq_similarity	Complete ORF gain		MFSD4A	Type_1	Type_2	ENST00000367147.9	ENST00000465651.1	domains_identified	Domain gain
CCND3	Naevi	Mel	ENST00000372991.8	ENST00000415497.6	domains_identified	Domain gain		MFSD4A	Type_1	Type_2	ENST00000367147.9	ENST00000478555.1	coding_potential	Transcript is coding
IGF2BP1	Naevi	Mel	ENST00000290341.8	ENST00000499130.6	coding_potential	Transcript is coding		MFSD4A	Type_1	Type_2	ENST00000367147.9	ENST00000478555.1	ORF_seq_similarity	Complete ORF gain
IGF2BP1	Naevi	Mel	ENST00000290341.8	ENST00000499130.6	ORF_seq_similarity	Complete ORF gain		MFSD4A	Type_1	Type_2	ENST00000367147.9	ENST00000478555.1	domains_identified	Domain gain
IGF2BP1	Naevi	Mel	ENST00000290341.8	ENST00000499130.6	domains_identified	Domain gain		PTPN3	Type_1	Type_2	ENST00000374541.4	ENST00000447271.1	coding_potential	Transcript is coding
GPR85	Naevi	Mel	ENST00000438062.5	ENST00000424100.1	coding_potential	Transcript is Noncoding		PTPN3	Type_1	Type_2	ENST00000374541.4	ENST00000447271.1	ORF_seq_similarity	Complete ORF gain
GPR85	Naevi	Mel	ENST00000438062.5	ENST00000424100.1	ORF_seq_similarity	Complete ORF loss		PTPN3	Type_1	Type_2	ENST00000374541.4	ENST00000447271.1	domains_identified	Domain gain
GPR85	Naevi	Mel	ENST00000438062.5	ENST00000424100.1	domains_identified	Domain loss		CA6	Type_1	Type_2	ENST00000377443.7	ENST00000480186.7	ORF_seq_similarity	ORF is longer
PPID	Naevi	Mel	ENST00000307720.4	ENST00000507213.1	coding_potential	Transcript is coding		F12	Type_1	Type_2	ENST00000504406.5	ENST00000503736.1	intron_retention	Intron retention gain
PPID	Naevi	Mel	ENST00000307720.4	ENST00000507213.1	ORF_seq_similarity	Complete ORF gain		RASAL1	Type_1	Type_2	ENST00000549444.5	ENST00000546530.5	coding_potential	Transcript is Noncoding
PPID	Naevi	Mel	ENST00000307720.4	ENST00000507213.1	domains_identified	Domain gain		RASAL1	Type_1	Type_2	ENST00000549444.5	ENST00000546530.5	ORF_seq_similarity	Complete ORF loss
MXRA7	Naevi	Mel	ENST00000375036.6	ENST00000449428.6	NMD_status	NMD sensitive		RASAL1	Type_1	Type_2	ENST00000549444.5	ENST00000546530.5	domains_identified	Domain loss
TNFRSF19	Naevi	Mel	ENST00000403372.6	ENST00000382263.3	ORF_seq_similarity	ORF is shorter		FCHSD2	Type_1	Type_2	ENST00000311172.11	ENST00000409418.9	domains_identified	Domain loss
TNFRSF19	Naevi	Mel	ENST00000403372.6	ENST00000382263.3	domains_identified	Domain loss		ANKRD36BP2	Type_1	Type_2	ENST00000393515.7	ENST00000454490.1	intron_retention	Intron retention loss
DENND5B	Naevi	Mel	ENST00000546299.1	ENST00000389082.10	ORF_seq_similarity	ORF is shorter		ANKRD36BP2	Type_1	Type_2	ENST00000393515.7	ENST00000454490.1	coding_potential	Transcript is coding
DENND5B	Naevi	Mel	ENST00000546299.1	ENST00000389082.10	domains_identified	Domain loss		FPR1	Type_1	Type_2	ENST00000304748.4	ENST00000594900.1	coding_potential	Transcript is coding
EPB41L4A	Naevi	Mel	ENST00000261486.6	ENST00000512395.5	coding_potential	Transcript is coding		FPR1	Type_1	Type_2	ENST00000304748.4	ENST00000594900.1	ORF_seq_similarity	Complete ORF gain
EPB41L4A	Naevi	Mel	ENST00000261486.6	ENST00000512395.5	ORF_seq_similarity	Complete ORF gain		FPR1	Type_1	Type_2	ENST00000304748.4	ENST00000594900.1	domains_identified	Domain gain
EPB41L4A	Naevi	Mel	ENST00000261486.6	ENST00000512395.5	domains_identified	Domain gain		PGM5	Type_1	Type_2	ENST00000396396.6	ENST00000587852.2	coding_potential	Transcript is coding
NUCKS1	Naevi	Mel	ENST00000464938.1	ENST00000367142.5	coding_potential	Transcript is Noncoding		PGM5	Type_1	Type_2	ENST00000396396.6	ENST00000587852.2	ORF_seq_similarity	Complete ORF gain
NUCKS1	Naevi	Mel	ENST00000464938.1	ENST00000367142.5	ORF_seq_similarity	Complete ORF loss		PGM5	Type_1	Type_2	ENST00000396396.6	ENST00000587852.2	domains_identified	Domain gain
TRIP11	Naevi	Mel	ENST00000554357.5	ENST00000267622.8	ORF_seq_similarity	Complete ORF loss		DUOX1	Type_1	Type_2	ENST00000389037.7	ENST00000558744.1	coding_potential	Transcript is coding
CENPM	Naevi	Mel	ENST00000215980.10	ENST00000396437.3	ORF_seq_similarity	Complete ORF gain		DUOX1	Type_1	Type_2	ENST00000389037.7	ENST00000558744.1	ORF_seq_similarity	Complete ORF gain
CENPM	Naevi	Mel	ENST00000215980.10	ENST00000396437.3	domains_identified	Domain gain		DUOX1	Type_1	Type_2	ENST00000389037.7	ENST00000558744.1	domains_identified	Domain gain
NUDCD1	Naevi	Mel	ENST00000519607.5	ENST00000239690.9	ORF_seq_similarity	ORF is shorter		DUOX1	Type_1	Type_2	ENST00000561166.1	ENST00000558744.1	coding_potential	Transcript is coding
NUDCD1	Naevi	Mel	ENST00000519607.5	ENST00000239690.9	NMD_status	NMD sensitive		DUOX1	Type_1	Type_2	ENST00000561166.1	ENST00000558744.1	ORF_seq_similarity	Complete ORF gain
NUDCD1	Naevi	Mel	ENST00000519607.5	ENST00000239690.9	domains_identified	Domain loss		DUOX1	Type_1	Type_2	ENST00000561166.1	ENST00000558744.1	domains_identified	Domain gain
SPATA24	Naevi	Mel	ENST00000302091.9	ENST00000451821.6	coding_potential	Transcript is Noncoding		SEPTIN6	Type_1	Type_2	ENST00000467310.1	ENST00000343984.5	ORF_seq_similarity	Complete ORF loss
SPATA24	Naevi	Mel	ENST00000302091.9	ENST00000451821.6	ORF_seq_similarity	Complete ORF loss		SEPTIN6	Type_1	Type_2	ENST00000467310.1	ENST00000343984.5	domains_identified	Domain loss
SPATA24	Naevi	Mel	ENST00000302091.9	ENST00000451821.6	domains_identified	Domain loss		PRSS53	Type_1	Type_2	ENST00000280606.6	ENST00000492427.2	intron_retention	Intron retention loss
VIT	Naevi	Mel	ENST00000457137.6	ENST00000379241.7	ORF_seq_similarity	ORF is shorter		PRSS53	Type_1	Type_2	ENST00000280606.6	ENST00000492427.2	coding_potential	Transcript is coding
VIT	Naevi	Mel	ENST00000457137.6	ENST00000379241.7	domains_identified	Domain loss		PRSS53	Type_1	Type_2	ENST00000280606.6	ENST00000492427.2	ORF_seq_similarity	Complete ORF gain
PSMC3IP	Naevi	Mel	ENST00000587209.5	ENST00000393795.7	intron_retention	Intron retention gain		PRSS53	Type_1	Type_2	ENST00000280606.6	ENST00000492427.2	domains_identified	Domain gain
PSMC3IP	Naevi	Mel	ENST00000587209.5	ENST00000393795.7	ORF_seq_similarity	ORF is shorter		RERG	Type_1	Type_2	ENST00000256953.6	ENST00000437578.2	coding_potential	Transcript is coding
PSMC3IP	Naevi	Mel	ENST00000587209.5	ENST00000393795.7	domains_identified	Domain loss		RERG	Type_1	Type_2	ENST00000256953.6	ENST00000437578.2	ORF_seq_similarity	Complete ORF gain
F5	Naevi	Mel	ENST00000495481.1	ENST00000367797.8	coding_potential	Transcript is Noncoding		RERG	Type_1	Type_2	ENST00000256953.6	ENST00000437578.2	domains_identified	Domain gain
F5	Naevi	Mel	ENST00000495481.1	ENST00000367797.8	ORF_seq_similarity	Complete ORF loss		SLC22A4	Type_1	Type_2	ENST00000200652.4	ENST00000491257.1	coding_potential	Transcript is coding
F5	Naevi	Mel	ENST00000495481.1	ENST00000367797.8	domains_identified	Domain loss		SLC22A4	Type_1	Type_2	ENST00000200652.4	ENST00000491257.1	ORF_seq_similarity	Complete ORF gain
SGIP1	Naevi	Mel	ENST00000480548.5	ENST00000435165.2	coding_potential	Transcript is Noncoding		SLC22A4	Type_1	Type_2	ENST00000200652.4	ENST00000491257.1	domains_identified	Domain gain
SGIP1	Naevi	Mel	ENST00000480548.5	ENST00000435165.2	ORF_seq_similarity	Complete ORF loss		MMP7	Type_1	Type_2	ENST00000260227.5	ENST00000531200.1	ORF_seq_similarity	Complete ORF gain
SGIP1	Naevi	Mel	ENST00000480548.5	ENST00000435165.2	domains_identified	Domain loss		MMP7	Type_1	Type_2	ENST00000260227.5	ENST00000531200.1	domains_identified	Domain gain
INTU	Naevi	Mel	ENST00000335251.11	ENST00000503626.5	intron_retention	Intron retention loss		FCRL5	Type_1	Type_2	ENST00000368190.7	ENST00000497286.5	ORF_seq_similarity	Complete ORF gain
INTU	Naevi	Mel	ENST00000335251.11	ENST00000503626.5	ORF_seq_similarity	ORF is longer		FCRL5	Type_1	Type_2	ENST00000368190.7	ENST00000497286.5	domains_identified	Domain gain
INTU	Naevi	Mel	ENST00000335251.11	ENST00000503626.5	NMD_status	NMD insensitive		PINLYP	Type_1	Type_2	ENST00000612042.4	ENST00000413422.4	intron_retention	Intron retention loss
FGF14	Naevi	Mel	ENST00000376131.8	ENST00000418923.2	coding_potential	Transcript is coding		PINLYP	Type_1	Type_2	ENST00000612042.4	ENST00000413422.4	coding_potential	Transcript is coding
FGF14	Naevi	Mel	ENST00000376131.8	ENST00000418923.2	ORF_seq_similarity	Complete ORF gain		PINLYP	Type_1	Type_2	ENST00000612042.4	ENST00000413422.4	ORF_seq_similarity	Complete ORF gain
FGF14	Naevi	Mel	ENST00000376131.8	ENST00000418923.2	domains_identified	Domain gain		PINLYP	Type_1	Type_2	ENST00000612042.4	ENST00000413422.4	domains_identified	Domain gain
JHY	Naevi	Mel	ENST00000307257.10	ENST00000531316.1	ORF_seq_similarity	ORF is shorter		USHBP1	Type_1	Type_2	ENST00000431146.6	ENST00000598309.1	coding_potential	Transcript is coding
JHY	Naevi	Mel	ENST00000307257.10	ENST00000531316.1	domains_identified	Domain loss		USHBP1	Type_1	Type_2	ENST00000431146.6	ENST00000598309.1	ORF_seq_similarity	Complete ORF gain
CCDC157	Naevi	Mel	ENST00000399824.6	ENST00000338306.7	coding_potential	Transcript is Noncoding		USHBP1	Type_1	Type_2	ENST00000431146.6	ENST00000598309.1	domains_identified	Domain gain
CCDC157	Naevi	Mel	ENST00000399824.6	ENST00000338306.7	ORF_seq_similarity	Complete ORF loss		PYROXD2	Type_1	Type_2	ENST00000494941.1	ENST00000370575.5	coding_potential	Transcript is Noncoding
ADARB2	Naevi	Mel	ENST00000381312.6	ENST00000381310.7	intron_retention	Intron retention loss		PYROXD2	Type_1	Type_2	ENST00000494941.1	ENST00000370575.5	ORF_seq_similarity	Complete ORF loss
ADARB2	Naevi	Mel	ENST00000381312.6	ENST00000381310.7	ORF_seq_similarity	ORF is longer		PYROXD2	Type_1	Type_2	ENST00000494941.1	ENST00000370575.5	domains_identified	Domain loss
ADARB2	Naevi	Mel	ENST00000381312.6	ENST00000381310.7	domains_identified	Domain gain		KLRD1	Type_1	Type_2	ENST00000344825.10	ENST00000381908.7	intron_retention	Intron retention loss
ADARB2	Naevi	Mel	ENST00000469464.1	ENST00000381310.7	intron_retention	Intron retention loss		KLRD1	Type_1	Type_2	ENST00000344825.10	ENST00000381908.7	coding_potential	Transcript is Noncoding
ADARB2	Naevi	Mel	ENST00000469464.1	ENST00000381310.7	coding_potential	Transcript is Noncoding		KLRD1	Type_1	Type_2	ENST00000344825.10	ENST00000381908.7	ORF_seq_similarity	Complete ORF loss
ADARB2	Naevi	Mel	ENST00000469464.1	ENST00000381310.7	ORF_seq_similarity	Complete ORF loss		KLRD1	Type_1	Type_2	ENST00000344825.10	ENST00000381908.7	domains_identified	Domain loss
ADARB2	Naevi	Mel	ENST00000469464.1	ENST00000381310.7	domains_identified	Domain loss		CCNB2	Type_1	Type_2	ENST00000288207.7	ENST00000621385.1	intron_retention	Intron retention loss
EXOC3L1	Naevi	Mel	ENST00000314586.11	ENST00000563536.1	ORF_seq_similarity	Complete ORF gain		TMEM266	Type_1	Type_2	ENST00000484722.5	ENST00000561302.5	ORF_seq_similarity	ORF is shorter
EXOC3L1	Naevi	Mel	ENST00000314586.11	ENST00000563536.1	domains_identified	Domain gain		IL2RG	Type_1	Type_2	ENST00000374202.6	ENST00000487883.1	intron_retention	Intron retention switch
GSTM5	Naevi	Mel	ENST00000647711.1	ENST00000256593.8	coding_potential	Transcript is Noncoding		IL2RG	Type_1	Type_2	ENST00000374202.6	ENST00000487883.1	coding_potential	Transcript is coding
GSTM5	Naevi	Mel	ENST00000647711.1	ENST00000256593.8	ORF_seq_similarity	Complete ORF loss		IL2RG	Type_1	Type_2	ENST00000374202.6	ENST00000487883.1	ORF_seq_similarity	Complete ORF gain
GSTM5	Naevi	Mel	ENST00000647711.1	ENST00000256593.8	domains_identified	Domain loss		IL2RG	Type_1	Type_2	ENST00000374202.6	ENST00000487883.1	domains_identified	Domain gain
SNTG1	Naevi	Mel	ENST00000520697.1	ENST00000517473.5	coding_potential	Transcript is Noncoding		GIPR	Type_1	Type_2	ENST00000590918.6	ENST00000588816.1	ORF_seq_similarity	Complete ORF gain
SNTG1	Naevi	Mel	ENST00000520697.1	ENST00000517473.5	ORF_seq_similarity	Complete ORF loss		GIPR	Type_1	Type_2	ENST00000590918.6	ENST00000588816.1	domains_identified	Domain gain
SNTG1	Naevi	Mel	ENST00000520697.1	ENST00000517473.5	domains_identified	Domain loss		KIAA0825	Type_1	Type_2	ENST00000513200.7	ENST00000504117.1	ORF_seq_similarity	Complete ORF gain
CCL3L1	Naevi	Mel	ENST00000619989.1	ENST00000612839.1	intron_retention	Intron retention loss		KIAA0825	Type_1	Type_2	ENST00000513200.7	ENST00000504117.1	domains_identified	Domain gain
FMN1	Naevi	Mel	ENST00000559610.1	ENST00000334528.13	coding_potential	Transcript is Noncoding		CYSRT1	Type_1	Type_2	ENST00000650725.2	ENST00000409414.2	ORF_seq_similarity	ORF is shorter
FMN1	Naevi	Mel	ENST00000559610.1	ENST00000334528.13	ORF_seq_similarity	Complete ORF loss		MBP	Type_1	Type_2	ENST00000397860.7	ENST00000397865.9	coding_potential	Transcript is coding
FMN1	Naevi	Mel	ENST00000559610.1	ENST00000334528.13	domains_identified	Domain loss		MBP	Type_1	Type_2	ENST00000397860.7	ENST00000397865.9	ORF_seq_similarity	Complete ORF gain
DLGAP1	Naevi	Mel	ENST00000315677.8	ENST00000400149.7	ORF_seq_similarity	ORF is longer		MBP	Type_1	Type_2	ENST00000397860.7	ENST00000397865.9	domains_identified	Domain gain
CCNJL	Naevi	Mel	ENST00000257536.12	ENST00000644926.1	intron_retention	Intron retention loss		GOLGA2P7	Type_1	Type_2	ENST00000400817.7	ENST00000559668.5	intron_retention	Intron retention loss
CCNJL	Naevi	Mel	ENST00000257536.12	ENST00000644926.1	ORF_seq_similarity	ORF is longer		GOLGA2P7	Type_1	Type_2	ENST00000400817.7	ENST00000559668.5	coding_potential	Transcript is Noncoding
CCNJL	Naevi	Mel	ENST00000257536.12	ENST00000644926.1	NMD_status	NMD insensitive		LINC02694	Type_1	Type_2	ENST00000645994.1	ENST00000647456.1	intron_retention	Intron retention loss
CCNJL	Naevi	Mel	ENST00000257536.12	ENST00000644926.1	domains_identified	Domain gain		FAM182B	Type_1	Type_2	ENST00000659462.1	ENST00000662668.1	intron_retention	Intron retention gain
AC105233.5	Naevi	Mel	ENST00000642083.1	ENST00000641813.1	coding_potential	Transcript is coding		FAM182B	Type_1	Type_2	ENST00000659462.1	ENST00000662668.1	coding_potential	Transcript is coding
PLXDC2	Naevi	Mel	ENST00000377238.2	ENST00000377252.5	ORF_seq_similarity	Complete ORF loss		RHOH	Type_1	Type_2	ENST00000613272.4	ENST00000514143.1	coding_potential	Transcript is coding
PLXDC2	Naevi	Mel	ENST00000377238.2	ENST00000377252.5	domains_identified	Domain loss		RHOH	Type_1	Type_2	ENST00000613272.4	ENST00000514143.1	ORF_seq_similarity	Complete ORF gain
ACSL6	Naevi	Mel	ENST00000484870.1	ENST00000651356.1	coding_potential	Transcript is Noncoding		RHOH	Type_1	Type_2	ENST00000613272.4	ENST00000514143.1	domains_identified	Domain gain
ACSL6	Naevi	Mel	ENST00000484870.1	ENST00000651356.1	ORF_seq_similarity	Complete ORF loss		RHOH	Type_1	Type_2	ENST00000614836.1	ENST00000514143.1	coding_potential	Transcript is coding
ACSL6	Naevi	Mel	ENST00000484870.1	ENST00000651356.1	domains_identified	Domain loss		RHOH	Type_1	Type_2	ENST00000614836.1	ENST00000514143.1	ORF_seq_similarity	Complete ORF gain
ICOS	Naevi	Mel	ENST00000316386.10	ENST00000435193.1	ORF_seq_similarity	ORF is longer		RHOH	Type_1	Type_2	ENST00000614836.1	ENST00000514143.1	domains_identified	Domain gain
FPR1	Naevi	Mel	ENST00000304748.4	ENST00000594900.1	coding_potential	Transcript is coding		SLC15A1	Type_1	Type_2	ENST00000376503.10	ENST00000376494.1	ORF_seq_similarity	Complete ORF gain
FPR1	Naevi	Mel	ENST00000304748.4	ENST00000594900.1	ORF_seq_similarity	Complete ORF gain		SLC15A1	Type_1	Type_2	ENST00000376503.10	ENST00000376494.1	domains_identified	Domain gain
FPR1	Naevi	Mel	ENST00000304748.4	ENST00000594900.1	domains_identified	Domain gain		ARHGEF6	Type_1	Type_2	ENST00000250617.7	ENST00000370620.5	ORF_seq_similarity	ORF is longer
MAP7D2	Naevi	Mel	ENST00000466145.1	ENST00000379651.7	coding_potential	Transcript is Noncoding		ARHGEF6	Type_1	Type_2	ENST00000250617.7	ENST00000370620.5	domains_identified	Domain gain
MAP7D2	Naevi	Mel	ENST00000466145.1	ENST00000379651.7	ORF_seq_similarity	Complete ORF loss		NIBAN3	Type_1	Type_2	ENST00000651880.1	ENST00000600519.5	ORF_seq_similarity	Complete ORF loss
MAP7D2	Naevi	Mel	ENST00000466145.1	ENST00000379651.7	domains_identified	Domain loss		STARD5	Type_1	Type_2	ENST00000325346.6	ENST00000302824.7	intron_retention	Intron retention loss
SLC25A35	Naevi	Mel	ENST00000577745.2	ENST00000581320.1	coding_potential	Transcript is coding		STARD5	Type_1	Type_2	ENST00000325346.6	ENST00000302824.7	coding_potential	Transcript is Noncoding
SLC25A35	Naevi	Mel	ENST00000577745.2	ENST00000581320.1	ORF_seq_similarity	Complete ORF gain		STARD5	Type_1	Type_2	ENST00000325346.6	ENST00000302824.7	ORF_seq_similarity	Complete ORF loss
SLC25A35	Naevi	Mel	ENST00000577745.2	ENST00000581320.1	domains_identified	Domain gain		STARD5	Type_1	Type_2	ENST00000325346.6	ENST00000302824.7	domains_identified	Domain loss
CALHM6	Naevi	Mel	ENST00000368606.7	ENST00000368604.2	coding_potential	Transcript is coding		ACOT7	Type_1	Type_2	ENST00000608083.5	ENST00000377855.6	ORF_seq_similarity	ORF is shorter
CALHM6	Naevi	Mel	ENST00000368606.7	ENST00000368604.2	ORF_seq_similarity	Complete ORF gain		PTGIR	Type_1	Type_2	ENST00000291294.7	ENST00000595460.1	intron_retention	Intron retention loss
CALHM6	Naevi	Mel	ENST00000368606.7	ENST00000368604.2	domains_identified	Domain gain		PTGIR	Type_1	Type_2	ENST00000291294.7	ENST00000595460.1	ORF_seq_similarity	Complete ORF gain
VGF	Naevi	Mel	ENST00000249330.3	ENST00000611537.1	intron_retention	Intron retention gain		PTGIR	Type_1	Type_2	ENST00000291294.7	ENST00000595460.1	domains_identified	Domain gain
VGF	Naevi	Mel	ENST00000249330.3	ENST00000611537.1	ORF_seq_similarity	ORF is longer		ZFP69	Type_1	Type_2	ENST00000372705.3	ENST00000482712.1	coding_potential	Transcript is coding
C12orf60	Naevi	Mel	ENST00000533472.1	ENST00000330828.3	coding_potential	Transcript is Noncoding		ZFP69	Type_1	Type_2	ENST00000372705.3	ENST00000482712.1	ORF_seq_similarity	Complete ORF gain
C12orf60	Naevi	Mel	ENST00000533472.1	ENST00000330828.3	ORF_seq_similarity	Complete ORF loss		ZFP69	Type_1	Type_2	ENST00000372705.3	ENST00000482712.1	domains_identified	Domain gain
C12orf60	Naevi	Mel	ENST00000533472.1	ENST00000330828.3	domains_identified	Domain loss		RUNX2	Type_1	Type_2	ENST00000359524.7	ENST00000473041.1	coding_potential	Transcript is coding
GHR	Naevi	Mel	ENST00000513625.1	ENST00000357703.6	coding_potential	Transcript is Noncoding		RUNX2	Type_1	Type_2	ENST00000359524.7	ENST00000473041.1	ORF_seq_similarity	Complete ORF gain
GHR	Naevi	Mel	ENST00000513625.1	ENST00000357703.6	ORF_seq_similarity	Complete ORF loss		RUNX2	Type_1	Type_2	ENST00000359524.7	ENST00000473041.1	domains_identified	Domain gain
GHR	Naevi	Mel	ENST00000513625.1	ENST00000357703.6	domains_identified	Domain loss		TCL1A	Type_1	Type_2	ENST00000402399.6	ENST00000555202.1	intron_retention	Intron retention gain
C5AR1	Naevi	Mel	ENST00000355085.4	ENST00000595501.5	coding_potential	Transcript is coding		TCL1A	Type_1	Type_2	ENST00000554012.5	ENST00000555202.1	intron_retention	Intron retention gain
C5AR1	Naevi	Mel	ENST00000355085.4	ENST00000595501.5	ORF_seq_similarity	Complete ORF gain		TCL1A	Type_1	Type_2	ENST00000554012.5	ENST00000555202.1	coding_potential	Transcript is Noncoding
C5AR1	Naevi	Mel	ENST00000355085.4	ENST00000595501.5	domains_identified	Domain gain		TCL1A	Type_1	Type_2	ENST00000554012.5	ENST00000555202.1	ORF_seq_similarity	Complete ORF loss
CKLF-CMTM1	Naevi	Mel	ENST00000527729.5	ENST00000527845.1	coding_potential	Transcript is coding		TCL1A	Type_1	Type_2	ENST00000554012.5	ENST00000555202.1	domains_identified	Domain loss
CKLF-CMTM1	Naevi	Mel	ENST00000527729.5	ENST00000527845.1	ORF_seq_similarity	Complete ORF gain		ESCO2	Type_1	Type_2	ENST00000305188.13	ENST00000523566.5	coding_potential	Transcript is coding
LINC00702	Naevi	Mel	ENST00000418372.1	ENST00000666481.1	intron_retention	Intron retention gain		ESCO2	Type_1	Type_2	ENST00000305188.13	ENST00000523566.5	ORF_seq_similarity	Complete ORF gain
CD72	Naevi	Mel	ENST00000259633.8	ENST00000465754.6	coding_potential	Transcript is coding		ESCO2	Type_1	Type_2	ENST00000305188.13	ENST00000523566.5	domains_identified	Domain gain
CD72	Naevi	Mel	ENST00000259633.8	ENST00000465754.6	ORF_seq_similarity	Complete ORF gain		ESCO2	Type_1	Type_2	ENST00000305188.13	ENST00000524293.1	ORF_seq_similarity	Complete ORF gain
CD72	Naevi	Mel	ENST00000259633.8	ENST00000465754.6	domains_identified	Domain gain		ESCO2	Type_1	Type_2	ENST00000305188.13	ENST00000524293.1	domains_identified	Domain gain
CHRNA5	Naevi	Mel	ENST00000394802.4	ENST00000299565.9	intron_retention	Intron retention loss		LINC00648	Type_1	Type_2	ENST00000555985.6	ENST00000556923.1	intron_retention	Intron retention gain
CHRNA5	Naevi	Mel	ENST00000394802.4	ENST00000299565.9	ORF_seq_similarity	Complete ORF loss		KLRC1	Type_1	Type_2	ENST00000347831.9	ENST00000543893.1	coding_potential	Transcript is coding
CHRNA5	Naevi	Mel	ENST00000394802.4	ENST00000299565.9	domains_identified	Domain loss		KLRC1	Type_1	Type_2	ENST00000347831.9	ENST00000543893.1	ORF_seq_similarity	Complete ORF gain
ACPP	Naevi	Mel	ENST00000336375.10	ENST00000351273.11	intron_retention	Intron retention gain		KLRC1	Type_1	Type_2	ENST00000347831.9	ENST00000543893.1	domains_identified	Domain gain
CKMT1B	Naevi	Mel	ENST00000441322.5	ENST00000437534.3	ORF_seq_similarity	ORF is longer		KLRC1	Type_1	Type_2	ENST00000359151.7	ENST00000543893.1	coding_potential	Transcript is coding
CKMT1B	Naevi	Mel	ENST00000441322.5	ENST00000437534.3	NMD_status	NMD insensitive		KLRC1	Type_1	Type_2	ENST00000359151.7	ENST00000543893.1	ORF_seq_similarity	Complete ORF gain
COL22A1	Naevi	Mel	ENST00000522546.1	ENST00000341807.8	coding_potential	Transcript is Noncoding		KLRC1	Type_1	Type_2	ENST00000359151.7	ENST00000543893.1	domains_identified	Domain gain
FAM71F2	Naevi	Mel	ENST00000641605.1	ENST00000641143.1	intron_retention	Intron retention gain		FCHO1	Type_1	Type_2	ENST00000596951.5	ENST00000593385.5	coding_potential	Transcript is coding
FAM71F2	Naevi	Mel	ENST00000641605.1	ENST00000641143.1	coding_potential	Transcript is coding		FCHO1	Type_1	Type_2	ENST00000596951.5	ENST00000593385.5	ORF_seq_similarity	Complete ORF gain
FAM71F2	Naevi	Mel	ENST00000641605.1	ENST00000641143.1	ORF_seq_similarity	Complete ORF gain		FCHO1	Type_1	Type_2	ENST00000596951.5	ENST00000593385.5	domains_identified	Domain gain
FAM71F2	Naevi	Mel	ENST00000641605.1	ENST00000641143.1	domains_identified	Domain gain		CEMIP	Type_1	Type_2	ENST00000220244.7	ENST00000495041.1	coding_potential	Transcript is coding
CENPU	Naevi	Mel	ENST00000510146.5	ENST00000281453.10	ORF_seq_similarity	ORF is shorter		CEMIP	Type_1	Type_2	ENST00000220244.7	ENST00000495041.1	ORF_seq_similarity	Complete ORF gain
CENPU	Naevi	Mel	ENST00000510146.5	ENST00000281453.10	NMD_status	NMD sensitive		CEMIP	Type_1	Type_2	ENST00000220244.7	ENST00000495041.1	domains_identified	Domain gain
RGS22	Naevi	Mel	ENST00000519421.1	ENST00000517769.5	intron_retention	Intron retention loss		CEMIP	Type_1	Type_2	ENST00000220244.7	ENST00000560027.1	ORF_seq_similarity	Complete ORF gain
PLEKHA6	Naevi	Mel	ENST00000564627.2	ENST00000272203.8	coding_potential	Transcript is Noncoding		CEMIP	Type_1	Type_2	ENST00000220244.7	ENST00000560027.1	domains_identified	Domain gain
PLEKHA6	Naevi	Mel	ENST00000564627.2	ENST00000272203.8	ORF_seq_similarity	Complete ORF loss		CENPA	Type_1	Type_2	ENST00000335756.9	ENST00000460030.1	intron_retention	Intron retention gain
PLEKHA6	Naevi	Mel	ENST00000564627.2	ENST00000272203.8	domains_identified	Domain loss		ARHGAP29	Type_1	Type_2	ENST00000260526.11	ENST00000546444.1	intron_retention	Intron retention loss
OLR1	Naevi	Mel	ENST00000309539.8	ENST00000339968.6	coding_potential	Transcript is coding		ARHGAP29	Type_1	Type_2	ENST00000260526.11	ENST00000546444.1	coding_potential	Transcript is coding
OLR1	Naevi	Mel	ENST00000309539.8	ENST00000339968.6	ORF_seq_similarity	Complete ORF gain		ARHGAP29	Type_1	Type_2	ENST00000260526.11	ENST00000546444.1	ORF_seq_similarity	Complete ORF gain
OLR1	Naevi	Mel	ENST00000309539.8	ENST00000339968.6	domains_identified	Domain gain		ARHGAP29	Type_1	Type_2	ENST00000260526.11	ENST00000546444.1	domains_identified	Domain gain
GPR160	Naevi	Mel	ENST00000355897.10	ENST00000485735.6	coding_potential	Transcript is coding		CYP4F12	Type_1	Type_2	ENST00000550308.6	ENST00000546792.5	coding_potential	Transcript is coding
GPR160	Naevi	Mel	ENST00000355897.10	ENST00000485735.6	ORF_seq_similarity	Complete ORF gain		CYP4F12	Type_1	Type_2	ENST00000550308.6	ENST00000546792.5	ORF_seq_similarity	Complete ORF gain
WDR26	Naevi	Mel	ENST00000486652.5	ENST00000651911.1	intron_retention	Intron retention loss		CYP4F12	Type_1	Type_2	ENST00000550308.6	ENST00000546792.5	domains_identified	Domain gain
WDR26	Naevi	Mel	ENST00000486652.5	ENST00000651911.1	ORF_seq_similarity	ORF is shorter		FGF11	Type_1	Type_2	ENST00000293829.9	ENST00000575082.5	coding_potential	Transcript is coding
WDR26	Naevi	Mel	ENST00000486652.5	ENST00000651911.1	NMD_status	NMD sensitive		FGF11	Type_1	Type_2	ENST00000293829.9	ENST00000575082.5	ORF_seq_similarity	Complete ORF gain
WDR26	Naevi	Mel	ENST00000486652.5	ENST00000651911.1	domains_identified	Domain loss		FGF11	Type_1	Type_2	ENST00000293829.9	ENST00000575082.5	domains_identified	Domain gain
COMMD3-BMI1	Naevi	Mel	ENST00000602390.5	ENST00000602395.1	intron_retention	Intron retention loss		ATP6V1B1	Type_1	Type_2	ENST00000234396.10	ENST00000495118.1	coding_potential	Transcript is coding
COMMD3-BMI1	Naevi	Mel	ENST00000602390.5	ENST00000602395.1	coding_potential	Transcript is coding		ATP6V1B1	Type_1	Type_2	ENST00000234396.10	ENST00000495118.1	ORF_seq_similarity	Complete ORF gain
COMMD3-BMI1	Naevi	Mel	ENST00000602390.5	ENST00000602395.1	ORF_seq_similarity	Complete ORF gain		ATP6V1B1	Type_1	Type_2	ENST00000234396.10	ENST00000495118.1	domains_identified	Domain gain
COMMD3-BMI1	Naevi	Mel	ENST00000602390.5	ENST00000602395.1	domains_identified	Domain gain		VASH2	Type_1	Type_2	ENST00000366968.8	ENST00000519906.1	intron_retention	Intron retention gain
PCDHGB6	Naevi	Mel	ENST00000616430.1	ENST00000520790.1	ORF_seq_similarity	ORF is shorter		VASH2	Type_1	Type_2	ENST00000366968.8	ENST00000519906.1	coding_potential	Transcript is coding
PCDHGB6	Naevi	Mel	ENST00000616430.1	ENST00000520790.1	domains_identified	Domain loss		VASH2	Type_1	Type_2	ENST00000366968.8	ENST00000519906.1	ORF_seq_similarity	Complete ORF gain
ZNF582-AS1	Naevi	Mel	ENST00000585659.1	ENST00000663112.1	intron_retention	Intron retention gain		VASH2	Type_1	Type_2	ENST00000366968.8	ENST00000519906.1	domains_identified	Domain gain
CENPO	Naevi	Mel	ENST00000380834.7	ENST00000473706.5	intron_retention	Intron retention loss		FAM83F	Type_1	Type_2	ENST00000473717.1	ENST00000333407.11	ORF_seq_similarity	ORF is shorter
REEP3	Naevi	Mel	ENST00000634963.1	ENST00000373758.5	coding_potential	Transcript is Noncoding		MRPL19	Type_1	Type_2	ENST00000409374.5	ENST00000492255.1	coding_potential	Transcript is coding
REEP3	Naevi	Mel	ENST00000634963.1	ENST00000373758.5	ORF_seq_similarity	Complete ORF loss		MRPL19	Type_1	Type_2	ENST00000409374.5	ENST00000492255.1	ORF_seq_similarity	Complete ORF gain
REEP3	Naevi	Mel	ENST00000634963.1	ENST00000373758.5	domains_identified	Domain loss		MRPL19	Type_1	Type_2	ENST00000409374.5	ENST00000492255.1	domains_identified	Domain gain
AC136475.5	Naevi	Mel	ENST00000524824.1	ENST00000534483.1	intron_retention	Intron retention loss		NUP210	Type_1	Type_2	ENST00000254508.7	ENST00000479519.5	ORF_seq_similarity	Complete ORF gain
ANKRD20A1	Naevi	Mel	ENST00000619063.4	ENST00000642071.2	coding_potential	Transcript is Noncoding		NUP210	Type_1	Type_2	ENST00000254508.7	ENST00000479519.5	domains_identified	Domain gain
ANKRD20A1	Naevi	Mel	ENST00000619063.4	ENST00000642071.2	ORF_seq_similarity	Complete ORF loss		MRTFA	Type_1	Type_2	ENST00000407029.7	ENST00000355630.9	domains_identified	Domain loss
ANKRD20A1	Naevi	Mel	ENST00000619063.4	ENST00000642071.2	domains_identified	Domain loss		SLC17A7	Type_1	Type_2	ENST00000221485.8	ENST00000598018.1	ORF_seq_similarity	Complete ORF gain
PEBP4	Naevi	Mel	ENST00000522278.1	ENST00000256404.8	coding_potential	Transcript is Noncoding		SLC17A7	Type_1	Type_2	ENST00000221485.8	ENST00000598018.1	domains_identified	Domain gain
PEBP4	Naevi	Mel	ENST00000522278.1	ENST00000256404.8	ORF_seq_similarity	Complete ORF loss		RASL10A	Type_1	Type_2	ENST00000216101.7	ENST00000608559.1	coding_potential	Transcript is coding
PEBP4	Naevi	Mel	ENST00000522278.1	ENST00000256404.8	domains_identified	Domain loss		RASL10A	Type_1	Type_2	ENST00000216101.7	ENST00000608559.1	ORF_seq_similarity	Complete ORF gain
FAM81A	Naevi	Mel	ENST00000288228.10	ENST00000558513.1	ORF_seq_similarity	Complete ORF gain		RASL10A	Type_1	Type_2	ENST00000216101.7	ENST00000608559.1	domains_identified	Domain gain
GCH1	Naevi	Mel	ENST00000622544.4	ENST00000254299.8	ORF_seq_similarity	Complete ORF gain		GCH1	Type_1	Type_2	ENST00000622544.4	ENST00000254299.8	ORF_seq_similarity	Complete ORF gain
GCH1	Naevi	Mel	ENST00000622544.4	ENST00000254299.8	domains_identified	Domain gain		GCH1	Type_1	Type_2	ENST00000622544.4	ENST00000254299.8	domains_identified	Domain gain
PDSS2	Naevi	Mel	ENST00000369037.9	ENST00000369031.4	ORF_seq_similarity	ORF is longer		WDR62	Type_1	Type_2	ENST00000270301.11	ENST00000589953.1	coding_potential	Transcript is coding
JSRP1	Naevi	Mel	ENST00000300961.10	ENST00000593238.2	coding_potential	Transcript is coding		WDR62	Type_1	Type_2	ENST00000270301.11	ENST00000589953.1	ORF_seq_similarity	Complete ORF gain
JSRP1	Naevi	Mel	ENST00000300961.10	ENST00000593238.2	ORF_seq_similarity	Complete ORF gain		WDR62	Type_1	Type_2	ENST00000270301.11	ENST00000589953.1	domains_identified	Domain gain
JSRP1	Naevi	Mel	ENST00000300961.10	ENST00000593238.2	domains_identified	Domain gain		SLC14A1	Type_1	Type_2	ENST00000321925.9	ENST00000619403.4	ORF_seq_similarity	ORF is longer
HIST1H2BJ	Naevi	Mel	ENST00000339812.2	ENST00000606923.1	coding_potential	Transcript is coding		MYH14	Type_1	Type_2	ENST00000262269.12	ENST00000376970.6	intron_retention	Intron retention loss
HIST1H2BJ	Naevi	Mel	ENST00000339812.2	ENST00000606923.1	ORF_seq_similarity	Complete ORF gain		MYH14	Type_1	Type_2	ENST00000262269.12	ENST00000376970.6	ORF_seq_similarity	ORF is shorter
HIST1H2BJ	Naevi	Mel	ENST00000339812.2	ENST00000606923.1	domains_identified	Domain gain		MYH14	Type_1	Type_2	ENST00000262269.12	ENST00000376970.6	NMD_status	NMD sensitive
CHST9	Naevi	Mel	ENST00000618847.5	ENST00000580774.2	ORF_seq_similarity	ORF is longer		MYH14	Type_1	Type_2	ENST00000262269.12	ENST00000376970.6	domains_identified	Domain loss
CHST9	Naevi	Mel	ENST00000618847.5	ENST00000580774.2	domains_identified	Domain gain		OTUD3	Type_1	Type_2	ENST00000375120.4	ENST00000481686.1	coding_potential	Transcript is coding
MAGEA3	Naevi	Mel	ENST00000370278.4	ENST00000417212.5	coding_potential	Transcript is coding		OTUD3	Type_1	Type_2	ENST00000375120.4	ENST00000481686.1	ORF_seq_similarity	Complete ORF gain
MAGEA3	Naevi	Mel	ENST00000370278.4	ENST00000417212.5	ORF_seq_similarity	Complete ORF gain		OTUD3	Type_1	Type_2	ENST00000375120.4	ENST00000481686.1	domains_identified	Domain gain
MAGEA3	Naevi	Mel	ENST00000370278.4	ENST00000417212.5	domains_identified	Domain gain		CCN6	Type_1	Type_2	ENST00000639360.1	ENST00000361714.5	intron_retention	Intron retention loss
ZBED6CL	Naevi	Mel	ENST00000343855.6	ENST00000463441.5	coding_potential	Transcript is coding		CAPN12	Type_1	Type_2	ENST00000594552.5	ENST00000597716.1	intron_retention	Intron retention loss
ZBED6CL	Naevi	Mel	ENST00000343855.6	ENST00000463441.5	ORF_seq_similarity	Complete ORF gain		TRPC6	Type_1	Type_2	ENST00000344327.8	ENST00000527240.1	coding_potential	Transcript is coding
IGFBP6	Naevi	Mel	ENST00000301464.4	ENST00000549628.1	coding_potential	Transcript is coding		TRPC6	Type_1	Type_2	ENST00000344327.8	ENST00000527240.1	ORF_seq_similarity	Complete ORF gain
IGFBP6	Naevi	Mel	ENST00000301464.4	ENST00000549628.1	ORF_seq_similarity	Complete ORF gain		TRPC6	Type_1	Type_2	ENST00000344327.8	ENST00000527240.1	domains_identified	Domain gain
IGFBP6	Naevi	Mel	ENST00000301464.4	ENST00000549628.1	domains_identified	Domain gain		RDH12	Type_1	Type_2	ENST00000267502.3	ENST00000547463.1	coding_potential	Transcript is coding
ITGA9	Naevi	Mel	ENST00000411817.2	ENST00000264741.10	coding_potential	Transcript is Noncoding		RDH12	Type_1	Type_2	ENST00000267502.3	ENST00000547463.1	ORF_seq_similarity	Complete ORF gain
ITGA9	Naevi	Mel	ENST00000411817.2	ENST00000264741.10	ORF_seq_similarity	Complete ORF loss		RDH12	Type_1	Type_2	ENST00000267502.3	ENST00000547463.1	domains_identified	Domain gain
ITGA9	Naevi	Mel	ENST00000411817.2	ENST00000264741.10	domains_identified	Domain loss		ZMAT1	Type_1	Type_2	ENST00000540921.5	ENST00000494068.1	intron_retention	Intron retention loss
MMP8	Naevi	Mel	ENST00000236826.8	ENST00000438475.2	ORF_seq_similarity	Complete ORF gain		ZMAT1	Type_1	Type_2	ENST00000540921.5	ENST00000494068.1	ORF_seq_similarity	Complete ORF gain
MMP8	Naevi	Mel	ENST00000236826.8	ENST00000438475.2	domains_identified	Domain gain		ZMAT1	Type_1	Type_2	ENST00000540921.5	ENST00000494068.1	domains_identified	Domain gain
MMP8	Naevi	Mel	ENST00000236826.8	ENST00000531168.1	coding_potential	Transcript is coding		TGM5	Type_1	Type_2	ENST00000220420.10	ENST00000396996.3	ORF_seq_similarity	Complete ORF gain
MMP8	Naevi	Mel	ENST00000236826.8	ENST00000531168.1	ORF_seq_similarity	Complete ORF gain		TGM5	Type_1	Type_2	ENST00000220420.10	ENST00000396996.3	domains_identified	Domain gain
MMP8	Naevi	Mel	ENST00000236826.8	ENST00000531168.1	domains_identified	Domain gain		SUGCT	Type_1	Type_2	ENST00000464028.1	ENST00000335693.8	coding_potential	Transcript is Noncoding
SUGCT	Naevi	Mel	ENST00000464028.1	ENST00000335693.8	coding_potential	Transcript is Noncoding		SUGCT	Type_1	Type_2	ENST00000464028.1	ENST00000335693.8	ORF_seq_similarity	Complete ORF loss
SUGCT	Naevi	Mel	ENST00000464028.1	ENST00000335693.8	ORF_seq_similarity	Complete ORF loss		SUGCT	Type_1	Type_2	ENST00000464028.1	ENST00000335693.8	domains_identified	Domain loss
SUGCT	Naevi	Mel	ENST00000464028.1	ENST00000335693.8	domains_identified	Domain loss		STAC3	Type_1	Type_2	ENST00000554578.5	ENST00000554003.1	coding_potential	Transcript is coding
SNAP29	Naevi	Mel	ENST00000439214.1	ENST00000215730.12	coding_potential	Transcript is Noncoding		STAC3	Type_1	Type_2	ENST00000554578.5	ENST00000554003.1	ORF_seq_similarity	Complete ORF gain
SNAP29	Naevi	Mel	ENST00000439214.1	ENST00000215730.12	ORF_seq_similarity	Complete ORF loss		STAC3	Type_1	Type_2	ENST00000554578.5	ENST00000554003.1	domains_identified	Domain gain
TIMM29	Naevi	Mel	ENST00000270502.7	ENST00000593162.1	coding_potential	Transcript is coding		CABP4	Type_1	Type_2	ENST00000325656.6	ENST00000545040.1	intron_retention	Intron retention gain
TIMM29	Naevi	Mel	ENST00000270502.7	ENST00000593162.1	ORF_seq_similarity	Complete ORF gain		CABP4	Type_1	Type_2	ENST00000325656.6	ENST00000545040.1	coding_potential	Transcript is coding
TIMM29	Naevi	Mel	ENST00000270502.7	ENST00000593162.1	domains_identified	Domain gain		CABP4	Type_1	Type_2	ENST00000325656.6	ENST00000545040.1	ORF_seq_similarity	Complete ORF gain
BANK1	Naevi	Mel	ENST00000322953.9	ENST00000428908.5	ORF_seq_similarity	ORF is longer		CABP4	Type_1	Type_2	ENST00000325656.6	ENST00000545040.1	domains_identified	Domain gain
BANK1	Naevi	Mel	ENST00000322953.9	ENST00000428908.5	domains_identified	Domain gain		ATP13A4	Type_1	Type_2	ENST00000400270.6	ENST00000489140.1	coding_potential	Transcript is coding
MMP10	Naevi	Mel	ENST00000279441.9	ENST00000539681.1	coding_potential	Transcript is coding		ATP13A4	Type_1	Type_2	ENST00000400270.6	ENST00000489140.1	ORF_seq_similarity	Complete ORF gain
MMP10	Naevi	Mel	ENST00000279441.9	ENST00000539681.1	ORF_seq_similarity	Complete ORF gain		AC156455.1	Type_1	Type_2	ENST00000653475.1	ENST00000538790.1	intron_retention	Intron retention gain
MMP10	Naevi	Mel	ENST00000279441.9	ENST00000539681.1	domains_identified	Domain gain		NBAS	Type_1	Type_2	ENST00000417461.5	ENST00000281513.10	ORF_seq_similarity	ORF is shorter
BATF2	Naevi	Mel	ENST00000301887.9	ENST00000435842.2	ORF_seq_similarity	ORF is longer		NBAS	Type_1	Type_2	ENST00000417461.5	ENST00000281513.10	NMD_status	NMD sensitive
BATF2	Naevi	Mel	ENST00000301887.9	ENST00000435842.2	domains_identified	Domain gain		NBAS	Type_1	Type_2	ENST00000417461.5	ENST00000281513.10	domains_identified	Domain loss
MCFD2	Naevi	Mel	ENST00000319466.8	ENST00000409800.5	coding_potential	Transcript is coding		LNX1	Type_1	Type_2	ENST00000263925.8	ENST00000306888.6	ORF_seq_similarity	ORF is longer
MCFD2	Naevi	Mel	ENST00000319466.8	ENST00000409800.5	ORF_seq_similarity	Complete ORF gain		LNX1	Type_1	Type_2	ENST00000263925.8	ENST00000306888.6	domains_identified	Domain gain
MCFD2	Naevi	Mel	ENST00000319466.8	ENST00000409800.5	domains_identified	Domain gain		KCNE4	Type_1	Type_2	ENST00000281830.3	ENST00000488477.2	coding_potential	Transcript is coding
CUBN	Naevi	Mel	ENST00000377833.9	ENST00000649135.1	coding_potential	Transcript is coding		KCNE4	Type_1	Type_2	ENST00000281830.3	ENST00000488477.2	ORF_seq_similarity	Complete ORF gain
CUBN	Naevi	Mel	ENST00000377833.9	ENST00000649135.1	ORF_seq_similarity	Complete ORF gain		KCNE4	Type_1	Type_2	ENST00000281830.3	ENST00000488477.2	domains_identified	Domain gain
CUBN	Naevi	Mel	ENST00000377833.9	ENST00000649135.1	domains_identified	Domain gain		NDUFAF4	Type_1	Type_2	ENST00000478382.1	ENST00000316149.8	coding_potential	Transcript is Noncoding
AL355312.2	Naevi	Mel	ENST00000622897.2	ENST00000455607.3	intron_retention	Intron retention gain		NDUFAF4	Type_1	Type_2	ENST00000478382.1	ENST00000316149.8	ORF_seq_similarity	Complete ORF loss
RBM47	Naevi	Mel	ENST00000381795.10	ENST00000381793.6	ORF_seq_similarity	ORF is shorter		NDUFAF4	Type_1	Type_2	ENST00000478382.1	ENST00000316149.8	domains_identified	Domain loss
MMEL1	Naevi	Mel	ENST00000464195.1	ENST00000469962.1	intron_retention	Intron retention gain		THAP4	Type_1	Type_2	ENST00000402136.5	ENST00000407315.6	ORF_seq_similarity	ORF is shorter
AC092902.4	Naevi	Mel	ENST00000641650.1	ENST00000641586.1	coding_potential	Transcript is coding		THAP4	Type_1	Type_2	ENST00000402136.5	ENST00000407315.6	domains_identified	Domain loss
DHRS4L1	Naevi	Mel	ENST00000558682.1	ENST00000559270.5	coding_potential	Transcript is coding		RASEF	Type_1	Type_2	ENST00000376447.4	ENST00000340717.4	ORF_seq_similarity	ORF is longer
PPP2R5E	Naevi	Mel	ENST00000422769.6	ENST00000337537.8	ORF_seq_similarity	ORF is shorter		RASEF	Type_1	Type_2	ENST00000376447.4	ENST00000340717.4	domains_identified	Domain gain
CLDN11	Naevi	Mel	ENST00000489485.5	ENST00000064724.7	coding_potential	Transcript is Noncoding		EVPL	Type_1	Type_2	ENST00000301607.7	ENST00000589231.1	coding_potential	Transcript is coding
CLDN11	Naevi	Mel	ENST00000489485.5	ENST00000064724.7	ORF_seq_similarity	Complete ORF loss		EVPL	Type_1	Type_2	ENST00000301607.7	ENST00000589231.1	ORF_seq_similarity	Complete ORF gain
CLDN11	Naevi	Mel	ENST00000489485.5	ENST00000064724.7	domains_identified	Domain loss		EVPL	Type_1	Type_2	ENST00000301607.7	ENST00000589231.1	domains_identified	Domain gain
ATRN	Naevi	Mel	ENST00000262919.10	ENST00000446916.2	ORF_seq_similarity	ORF is longer		SPN	Type_1	Type_2	ENST00000563039.2	ENST00000652691.1	intron_retention	Intron retention loss
PIK3R5	Naevi	Mel	ENST00000269300.8	ENST00000616147.4	ORF_seq_similarity	ORF is shorter		SPN	Type_1	Type_2	ENST00000563039.2	ENST00000652691.1	NMD_status	NMD sensitive
PIK3R5	Naevi	Mel	ENST00000269300.8	ENST00000616147.4	NMD_status	NMD sensitive		CCR6	Type_1	Type_2	ENST00000400926.5	ENST00000646493.1	coding_potential	Transcript is coding
KRT27	Naevi	Mel	ENST00000540723.1	ENST00000301656.4	coding_potential	Transcript is Noncoding		CCR6	Type_1	Type_2	ENST00000400926.5	ENST00000646493.1	ORF_seq_similarity	Complete ORF gain
KRT27	Naevi	Mel	ENST00000540723.1	ENST00000301656.4	ORF_seq_similarity	Complete ORF loss		CCR6	Type_1	Type_2	ENST00000400926.5	ENST00000646493.1	domains_identified	Domain gain
KRT27	Naevi	Mel	ENST00000540723.1	ENST00000301656.4	domains_identified	Domain loss		MGAT3	Type_1	Type_2	ENST00000341184.7	ENST00000418314.1	coding_potential	Transcript is coding
GPR158	Naevi	Mel	ENST00000482641.2	ENST00000650135.1	coding_potential	Transcript is Noncoding		MGAT3	Type_1	Type_2	ENST00000341184.7	ENST00000418314.1	ORF_seq_similarity	Complete ORF gain
GPR158	Naevi	Mel	ENST00000482641.2	ENST00000650135.1	ORF_seq_similarity	Complete ORF loss		MGAT3	Type_1	Type_2	ENST00000341184.7	ENST00000418314.1	domains_identified	Domain gain
GPR158	Naevi	Mel	ENST00000482641.2	ENST00000650135.1	domains_identified	Domain loss		ERP29	Type_1	Type_2	ENST00000261735.4	ENST00000455836.1	ORF_seq_similarity	ORF is longer
ZEB1-AS1	Naevi	Mel	ENST00000424191.1	ENST00000607166.1	intron_retention	Intron retention loss		ERP29	Type_1	Type_2	ENST00000261735.4	ENST00000455836.1	domains_identified	Domain gain
POLR2D	Naevi	Mel	ENST00000409955.1	ENST00000272645.9	coding_potential	Transcript is Noncoding		ADGRG2	Type_1	Type_2	ENST00000357991.7	ENST00000479496.1	intron_retention	Intron retention loss
POLR2D	Naevi	Mel	ENST00000409955.1	ENST00000272645.9	ORF_seq_similarity	Complete ORF loss		ADGRG2	Type_1	Type_2	ENST00000357991.7	ENST00000479496.1	coding_potential	Transcript is coding
POLR2D	Naevi	Mel	ENST00000409955.1	ENST00000272645.9	domains_identified	Domain loss		ADGRG2	Type_1	Type_2	ENST00000357991.7	ENST00000479496.1	ORF_seq_similarity	Complete ORF gain
APOBEC3B	Naevi	Mel	ENST00000333467.4	ENST00000335760.9	ORF_seq_similarity	ORF is longer		ADGRG2	Type_1	Type_2	ENST00000357991.7	ENST00000479496.1	domains_identified	Domain gain
APOBEC3B	Naevi	Mel	ENST00000333467.4	ENST00000335760.9	NMD_status	NMD insensitive		PKP2	Type_1	Type_2	ENST00000340811.8	ENST00000546741.2	coding_potential	Transcript is coding
APOBEC3B	Naevi	Mel	ENST00000333467.4	ENST00000335760.9	domains_identified	Domain gain		PKP2	Type_1	Type_2	ENST00000340811.8	ENST00000546741.2	ORF_seq_similarity	Complete ORF gain
BCHE	Naevi	Mel	ENST00000479451.5	ENST00000264381.8	coding_potential	Transcript is Noncoding		PKP2	Type_1	Type_2	ENST00000340811.8	ENST00000546741.2	domains_identified	Domain gain
BCHE	Naevi	Mel	ENST00000479451.5	ENST00000264381.8	ORF_seq_similarity	Complete ORF loss		AC051619.5	Type_1	Type_2	ENST00000559003.5	ENST00000663463.1	coding_potential	Transcript is Noncoding
BCHE	Naevi	Mel	ENST00000479451.5	ENST00000264381.8	domains_identified	Domain loss		SDK1	Type_1	Type_2	ENST00000466611.1	ENST00000478527.1	coding_potential	Transcript is coding
ASIP	Naevi	Mel	ENST00000374954.3	ENST00000568305.5	coding_potential	Transcript is Noncoding		ASPG	Type_1	Type_2	ENST00000550583.1	ENST00000551177.6	intron_retention	Intron retention loss
ASIP	Naevi	Mel	ENST00000374954.3	ENST00000568305.5	ORF_seq_similarity	Complete ORF loss		ASPG	Type_1	Type_2	ENST00000550583.1	ENST00000551177.6	ORF_seq_similarity	ORF is shorter
ASIP	Naevi	Mel	ENST00000374954.3	ENST00000568305.5	domains_identified	Domain loss		ASPG	Type_1	Type_2	ENST00000550583.1	ENST00000551177.6	domains_identified	Domain loss
CCNB2	Naevi	Mel	ENST00000288207.7	ENST00000621385.1	intron_retention	Intron retention loss		SNX22	Type_1	Type_2	ENST00000325881.9	ENST00000560607.5	intron_retention	Intron retention switch
GRAMD1C	Naevi	Mel	ENST00000467895.1	ENST00000440446.2	coding_potential	Transcript is Noncoding		SNX22	Type_1	Type_2	ENST00000325881.9	ENST00000560607.5	ORF_seq_similarity	Complete ORF gain
GRAMD1C	Naevi	Mel	ENST00000467895.1	ENST00000440446.2	ORF_seq_similarity	Complete ORF loss		SNX22	Type_1	Type_2	ENST00000325881.9	ENST00000560607.5	domains_identified	Domain gain
GRAMD1C	Naevi	Mel	ENST00000467895.1	ENST00000440446.2	domains_identified	Domain loss		AC105233.5	Type_1	Type_2	ENST00000641813.1	ENST00000642083.1	coding_potential	Transcript is Noncoding
ZNF778	Naevi	Mel	ENST00000565877.5	ENST00000620195.4	coding_potential	Transcript is Noncoding		ALOX12P2	Type_1	Type_2	ENST00000575787.1	ENST00000574727.5	intron_retention	Intron retention loss
ZNF778	Naevi	Mel	ENST00000565877.5	ENST00000620195.4	ORF_seq_similarity	Complete ORF loss		ALOX12P2	Type_1	Type_2	ENST00000575787.1	ENST00000574727.5	coding_potential	Transcript is Noncoding
ZNF778	Naevi	Mel	ENST00000565877.5	ENST00000620195.4	domains_identified	Domain loss		SPATA24	Type_1	Type_2	ENST00000302091.9	ENST00000451821.6	coding_potential	Transcript is Noncoding
IGLL5	Naevi	Mel	ENST00000526893.6	ENST00000531372.1	ORF_seq_similarity	ORF is longer		SPATA24	Type_1	Type_2	ENST00000302091.9	ENST00000451821.6	ORF_seq_similarity	Complete ORF loss
IGLL5	Naevi	Mel	ENST00000526893.6	ENST00000531372.1	domains_identified	Domain gain		SPATA24	Type_1	Type_2	ENST00000302091.9	ENST00000451821.6	domains_identified	Domain loss
HPN	Naevi	Mel	ENST00000593305.1	ENST00000392226.5	intron_retention	Intron retention gain		MECOM	Type_1	Type_2	ENST00000628990.2	ENST00000486748.2	intron_retention	Intron retention gain
HPN	Naevi	Mel	ENST00000593305.1	ENST00000392226.5	ORF_seq_similarity	Complete ORF loss		MECOM	Type_1	Type_2	ENST00000628990.2	ENST00000486748.2	coding_potential	Transcript is coding
HPN	Naevi	Mel	ENST00000593305.1	ENST00000392226.5	domains_identified	Domain loss		MECOM	Type_1	Type_2	ENST00000628990.2	ENST00000486748.2	ORF_seq_similarity	Complete ORF gain
HPN	Naevi	Mel	ENST00000600675.1	ENST00000392226.5	intron_retention	Intron retention gain		MECOM	Type_1	Type_2	ENST00000628990.2	ENST00000486748.2	domains_identified	Domain gain
HPN	Naevi	Mel	ENST00000600675.1	ENST00000392226.5	coding_potential	Transcript is Noncoding		SLX1B-SULT1A4	Type_1	Type_2	ENST00000344620.10	ENST00000395400.4	intron_retention	Intron retention gain
HPN	Naevi	Mel	ENST00000600675.1	ENST00000392226.5	ORF_seq_similarity	Complete ORF loss		TXK	Type_1	Type_2	ENST00000264316.9	ENST00000510457.1	ORF_seq_similarity	Complete ORF gain
HPN	Naevi	Mel	ENST00000600675.1	ENST00000392226.5	domains_identified	Domain loss		TXK	Type_1	Type_2	ENST00000264316.9	ENST00000510457.1	domains_identified	Domain gain
MBP	Naevi	Mel	ENST00000397866.8	ENST00000397865.9	intron_retention	Intron retention loss		GOLGA6L4	Type_1	Type_2	ENST00000510439.7	ENST00000515814.1	intron_retention	Intron retention loss
MBP	Naevi	Mel	ENST00000397866.8	ENST00000397865.9	coding_potential	Transcript is coding		GOLGA6L4	Type_1	Type_2	ENST00000510439.7	ENST00000515814.1	coding_potential	Transcript is coding
MBP	Naevi	Mel	ENST00000397866.8	ENST00000397865.9	ORF_seq_similarity	Complete ORF gain		GOLGA6L4	Type_1	Type_2	ENST00000510439.7	ENST00000515814.1	ORF_seq_similarity	Complete ORF gain
MBP	Naevi	Mel	ENST00000397866.8	ENST00000397865.9	domains_identified	Domain gain		GOLGA6L4	Type_1	Type_2	ENST00000510439.7	ENST00000515814.1	domains_identified	Domain gain
FAM216A	Naevi	Mel	ENST00000377673.10	ENST00000546396.1	coding_potential	Transcript is coding		DLG3	Type_1	Type_2	ENST00000542398.1	ENST00000461646.1	ORF_seq_similarity	Complete ORF gain
FAM216A	Naevi	Mel	ENST00000377673.10	ENST00000546396.1	ORF_seq_similarity	Complete ORF gain		DLG3	Type_1	Type_2	ENST00000542398.1	ENST00000461646.1	domains_identified	Domain gain
FAM216A	Naevi	Mel	ENST00000377673.10	ENST00000546396.1	domains_identified	Domain gain		ETV7	Type_1	Type_2	ENST00000340181.9	ENST00000627426.2	ORF_seq_similarity	ORF is longer
SPACA9	Naevi	Mel	ENST00000350499.6	ENST00000356311.10	intron_retention	Intron retention loss		ETV7	Type_1	Type_2	ENST00000340181.9	ENST00000627426.2	domains_identified	Domain gain
SPACA9	Naevi	Mel	ENST00000350499.6	ENST00000356311.10	ORF_seq_similarity	ORF is shorter		KIF20A	Type_1	Type_2	ENST00000394894.8	ENST00000503417.1	ORF_seq_similarity	Complete ORF gain
SDK2	Naevi	Mel	ENST00000392650.8	ENST00000585283.1	coding_potential	Transcript is coding		KIF20A	Type_1	Type_2	ENST00000394894.8	ENST00000503417.1	domains_identified	Domain gain
SDK2	Naevi	Mel	ENST00000392650.8	ENST00000585283.1	ORF_seq_similarity	Complete ORF gain		PHLPP2	Type_1	Type_2	ENST00000568954.5	ENST00000393524.6	domains_identified	Domain gain
SDK2	Naevi	Mel	ENST00000392650.8	ENST00000585283.1	domains_identified	Domain gain		BEAN1	Type_1	Type_2	ENST00000536005.7	ENST00000618932.1	intron_retention	Intron retention gain
UNC80	Naevi	Mel	ENST00000478701.1	ENST00000272845.10	ORF_seq_similarity	Complete ORF loss		BEAN1	Type_1	Type_2	ENST00000536005.7	ENST00000618932.1	coding_potential	Transcript is coding
UNC80	Naevi	Mel	ENST00000478701.1	ENST00000272845.10	domains_identified	Domain loss		BEAN1	Type_1	Type_2	ENST00000536005.7	ENST00000618932.1	ORF_seq_similarity	Complete ORF gain
ZNF480	Naevi	Mel	ENST00000598016.5	ENST00000595962.6	coding_potential	Transcript is Noncoding		STARD13	Type_1	Type_2	ENST00000399365.7	ENST00000336934.10	ORF_seq_similarity	ORF is shorter
ZNF480	Naevi	Mel	ENST00000598016.5	ENST00000595962.6	ORF_seq_similarity	Complete ORF loss		STARD13	Type_1	Type_2	ENST00000399365.7	ENST00000336934.10	domains_identified	Domain loss
ZNF480	Naevi	Mel	ENST00000598016.5	ENST00000595962.6	domains_identified	Domain loss		LRP1	Type_1	Type_2	ENST00000556356.1	ENST00000243077.8	intron_retention	Intron retention gain
OMG	Naevi	Mel	ENST00000584094.1	ENST00000247271.5	coding_potential	Transcript is Noncoding		LRP1	Type_1	Type_2	ENST00000556356.1	ENST00000243077.8	ORF_seq_similarity	Complete ORF loss
OMG	Naevi	Mel	ENST00000584094.1	ENST00000247271.5	ORF_seq_similarity	Complete ORF loss		LRP1	Type_1	Type_2	ENST00000556356.1	ENST00000243077.8	domains_identified	Domain loss
OMG	Naevi	Mel	ENST00000584094.1	ENST00000247271.5	domains_identified	Domain loss		L3MBTL4	Type_1	Type_2	ENST00000317931.11	ENST00000400104.7	ORF_seq_similarity	ORF is longer
EMP2	Naevi	Mel	ENST00000536829.1	ENST00000359543.8	coding_potential	Transcript is coding		L3MBTL4	Type_1	Type_2	ENST00000317931.11	ENST00000400104.7	domains_identified	Domain gain
EMP2	Naevi	Mel	ENST00000536829.1	ENST00000359543.8	ORF_seq_similarity	Complete ORF gain		CHI3L1	Type_1	Type_2	ENST00000255409.8	ENST00000473185.1	intron_retention	Intron retention loss
EMP2	Naevi	Mel	ENST00000536829.1	ENST00000359543.8	domains_identified	Domain gain		CHI3L1	Type_1	Type_2	ENST00000255409.8	ENST00000473185.1	ORF_seq_similarity	Complete ORF gain
SERPINB4	Naevi	Mel	ENST00000341074.10	ENST00000413673.5	ORF_seq_similarity	Complete ORF gain		CHI3L1	Type_1	Type_2	ENST00000255409.8	ENST00000473185.1	domains_identified	Domain gain
SERPINB4	Naevi	Mel	ENST00000341074.10	ENST00000413673.5	domains_identified	Domain gain		CHRNA5	Type_1	Type_2	ENST00000394802.4	ENST00000299565.9	intron_retention	Intron retention loss
SERPINB4	Naevi	Mel	ENST00000341074.10	ENST00000436264.1	coding_potential	Transcript is coding		CHRNA5	Type_1	Type_2	ENST00000394802.4	ENST00000299565.9	ORF_seq_similarity	Complete ORF loss
SERPINB4	Naevi	Mel	ENST00000341074.10	ENST00000436264.1	ORF_seq_similarity	Complete ORF gain		CHRNA5	Type_1	Type_2	ENST00000394802.4	ENST00000299565.9	domains_identified	Domain loss
SERPINB4	Naevi	Mel	ENST00000341074.10	ENST00000436264.1	domains_identified	Domain gain		ZNF552	Type_1	Type_2	ENST00000391701.1	ENST00000594473.1	coding_potential	Transcript is coding
AQP5	Naevi	Mel	ENST00000553132.1	ENST00000293599.7	intron_retention	Intron retention gain		ZNF552	Type_1	Type_2	ENST00000391701.1	ENST00000594473.1	ORF_seq_similarity	Complete ORF gain
AQP5	Naevi	Mel	ENST00000553132.1	ENST00000293599.7	coding_potential	Transcript is Noncoding		ZNF552	Type_1	Type_2	ENST00000391701.1	ENST00000594473.1	domains_identified	Domain gain
AQP5	Naevi	Mel	ENST00000553132.1	ENST00000293599.7	ORF_seq_similarity	Complete ORF loss		GPR173	Type_1	Type_2	ENST00000332582.4	ENST00000375466.2	coding_potential	Transcript is coding
AQP5	Naevi	Mel	ENST00000553132.1	ENST00000293599.7	domains_identified	Domain loss		GPR173	Type_1	Type_2	ENST00000332582.4	ENST00000375466.2	ORF_seq_similarity	Complete ORF gain
AS3MT	Naevi	Mel	ENST00000369880.8	ENST00000615257.1	intron_retention	Intron retention gain		GPR173	Type_1	Type_2	ENST00000332582.4	ENST00000375466.2	domains_identified	Domain gain
AS3MT	Naevi	Mel	ENST00000369880.8	ENST00000615257.1	NMD_status	NMD insensitive		SNX1	Type_1	Type_2	ENST00000560829.5	ENST00000559844.6	intron_retention	Intron retention loss
NTNG1	Naevi	Mel	ENST00000370068.5	ENST00000370074.8	ORF_seq_similarity	ORF is longer		SNX1	Type_1	Type_2	ENST00000560829.5	ENST00000559844.6	ORF_seq_similarity	ORF is shorter
NTNG1	Naevi	Mel	ENST00000370068.5	ENST00000370074.8	domains_identified	Domain gain		SNX1	Type_1	Type_2	ENST00000560829.5	ENST00000559844.6	domains_identified	Domain loss
ADAMTS12	Naevi	Mel	ENST00000504830.6	ENST00000515401.1	ORF_seq_similarity	ORF is longer		SCML1	Type_1	Type_2	ENST00000380045.7	ENST00000487842.1	intron_retention	Intron retention loss
ADAMTS12	Naevi	Mel	ENST00000504830.6	ENST00000515401.1	domains_identified	Domain gain		SCML1	Type_1	Type_2	ENST00000380045.7	ENST00000487842.1	ORF_seq_similarity	Complete ORF gain
SLC30A2	Naevi	Mel	ENST00000374278.7	ENST00000374276.4	ORF_seq_similarity	ORF is shorter		SCML1	Type_1	Type_2	ENST00000380045.7	ENST00000487842.1	domains_identified	Domain gain
GRHL2	Naevi	Mel	ENST00000472106.2	ENST00000646743.1	ORF_seq_similarity	Complete ORF loss		PWP2	Type_1	Type_2	ENST00000291576.12	ENST00000486126.1	coding_potential	Transcript is coding
GRHL2	Naevi	Mel	ENST00000472106.2	ENST00000646743.1	domains_identified	Domain loss		PWP2	Type_1	Type_2	ENST00000291576.12	ENST00000486126.1	ORF_seq_similarity	Complete ORF gain
STRA6	Naevi	Mel	ENST00000395105.9	ENST00000569936.5	intron_retention	Intron retention gain		PWP2	Type_1	Type_2	ENST00000291576.12	ENST00000486126.1	domains_identified	Domain gain
STRA6	Naevi	Mel	ENST00000395105.9	ENST00000569936.5	ORF_seq_similarity	ORF is longer		ZNF236	Type_1	Type_2	ENST00000253159.12	ENST00000584565.1	coding_potential	Transcript is coding
STRA6	Naevi	Mel	ENST00000395105.9	ENST00000569936.5	NMD_status	NMD insensitive		ZNF236	Type_1	Type_2	ENST00000253159.12	ENST00000584565.1	ORF_seq_similarity	Complete ORF gain
GLIPR1L2	Naevi	Mel	ENST00000320460.8	ENST00000550916.6	ORF_seq_similarity	ORF is shorter		ZNF236	Type_1	Type_2	ENST00000253159.12	ENST00000584565.1	domains_identified	Domain gain
KIF6	Naevi	Mel	ENST00000229913.9	ENST00000465719.1	coding_potential	Transcript is coding		PRR4	Type_1	Type_2	ENST00000228811.8	ENST00000539179.5	ORF_seq_similarity	Complete ORF gain
KIF6	Naevi	Mel	ENST00000229913.9	ENST00000465719.1	ORF_seq_similarity	Complete ORF gain		PRR4	Type_1	Type_2	ENST00000228811.8	ENST00000539179.5	domains_identified	Domain gain
PIK3C2G	Naevi	Mel	ENST00000535651.5	ENST00000538779.5	ORF_seq_similarity	ORF is shorter		KCNG1	Type_1	Type_2	ENST00000371571.5	ENST00000506387.1	ORF_seq_similarity	Complete ORF gain
PIK3C2G	Naevi	Mel	ENST00000535651.5	ENST00000538779.5	domains_identified	Domain loss		KCNG1	Type_1	Type_2	ENST00000371571.5	ENST00000506387.1	domains_identified	Domain gain
COL10A1	Naevi	Mel	ENST00000418500.1	ENST00000327673.4	coding_potential	Transcript is Noncoding		HAMP	Type_1	Type_2	ENST00000222304.5	ENST00000593580.1	intron_retention	Intron retention loss
COL10A1	Naevi	Mel	ENST00000418500.1	ENST00000327673.4	ORF_seq_similarity	Complete ORF loss		PLS1	Type_1	Type_2	ENST00000457734.7	ENST00000475296.5	coding_potential	Transcript is coding
COL10A1	Naevi	Mel	ENST00000418500.1	ENST00000327673.4	domains_identified	Domain loss		PLS1	Type_1	Type_2	ENST00000457734.7	ENST00000475296.5	ORF_seq_similarity	Complete ORF gain
AC022075.1	Naevi	Mel	ENST00000666750.1	ENST00000665123.1	intron_retention	Intron retention loss		PLS1	Type_1	Type_2	ENST00000457734.7	ENST00000475296.5	domains_identified	Domain gain
SOX15	Naevi	Mel	ENST00000250055.3	ENST00000538513.6	intron_retention	Intron retention gain		AL033384.1	Type_1	Type_2	ENST00000431554.2	ENST00000511369.5	intron_retention	Intron retention loss
OVOL1	Naevi	Mel	ENST00000335987.8	ENST00000531907.1	coding_potential	Transcript is coding		CNTN3	Type_1	Type_2	ENST00000263665.6	ENST00000477856.1	coding_potential	Transcript is coding
OVOL1	Naevi	Mel	ENST00000335987.8	ENST00000531907.1	ORF_seq_similarity	Complete ORF gain		CNTN3	Type_1	Type_2	ENST00000263665.6	ENST00000477856.1	ORF_seq_similarity	Complete ORF gain
OVOL1	Naevi	Mel	ENST00000335987.8	ENST00000531907.1	domains_identified	Domain gain		CNTN3	Type_1	Type_2	ENST00000263665.6	ENST00000477856.1	domains_identified	Domain gain
MELK	Naevi	Mel	ENST00000536987.5	ENST00000626154.2	ORF_seq_similarity	ORF is longer		STAC2	Type_1	Type_2	ENST00000333461.6	ENST00000584501.1	ORF_seq_similarity	ORF is longer
MELK	Naevi	Mel	ENST00000536987.5	ENST00000626154.2	NMD_status	NMD insensitive		STAC2	Type_1	Type_2	ENST00000333461.6	ENST00000584501.1	NMD_status	NMD insensitive
MELK	Naevi	Mel	ENST00000536987.5	ENST00000626154.2	domains_identified	Domain gain		STAC2	Type_1	Type_2	ENST00000333461.6	ENST00000584501.1	domains_identified	Domain gain
GAS2	Naevi	Mel	ENST00000648096.1	ENST00000454584.6	coding_potential	Transcript is Noncoding		PLEKHG6	Type_1	Type_2	ENST00000011684.11	ENST00000304581.8	ORF_seq_similarity	ORF is longer
GAS2	Naevi	Mel	ENST00000648096.1	ENST00000454584.6	ORF_seq_similarity	Complete ORF loss		PLEKHG6	Type_1	Type_2	ENST00000011684.11	ENST00000304581.8	domains_identified	Domain gain
GAS2	Naevi	Mel	ENST00000648096.1	ENST00000454584.6	domains_identified	Domain loss		PLEKHG6	Type_1	Type_2	ENST00000536531.5	ENST00000304581.8	ORF_seq_similarity	ORF is longer
FSBP	Naevi	Mel	ENST00000611249.2	ENST00000481490.3	ORF_seq_similarity	ORF is longer		PLEKHG6	Type_1	Type_2	ENST00000536531.5	ENST00000304581.8	domains_identified	Domain gain
FSBP	Naevi	Mel	ENST00000611249.2	ENST00000481490.3	domains_identified	Domain gain		GLS2	Type_1	Type_2	ENST00000311966.9	ENST00000491880.1	coding_potential	Transcript is coding
								GLS2	Type_1	Type_2	ENST00000311966.9	ENST00000491880.1	ORF_seq_similarity	Complete ORF gain
								GLS2	Type_1	Type_2	ENST00000311966.9	ENST00000491880.1	domains_identified	Domain gain
								GLS2	Type_1	Type_2	ENST00000424141.6	ENST00000491880.1	coding_potential	Transcript is coding
								GLS2	Type_1	Type_2	ENST00000424141.6	ENST00000491880.1	ORF_seq_similarity	Complete ORF gain
								GLS2	Type_1	Type_2	ENST00000424141.6	ENST00000491880.1	domains_identified	Domain gain
								ITGB1BP2	Type_1	Type_2	ENST00000373829.8	ENST00000475413.1	coding_potential	Transcript is coding
								ITGB1BP2	Type_1	Type_2	ENST00000373829.8	ENST00000475413.1	ORF_seq_similarity	Complete ORF gain
								ITGB1BP2	Type_1	Type_2	ENST00000373829.8	ENST00000475413.1	domains_identified	Domain gain
								GAS2	Type_1	Type_2	ENST00000648096.1	ENST00000454584.6	coding_potential	Transcript is Noncoding
								GAS2	Type_1	Type_2	ENST00000648096.1	ENST00000454584.6	ORF_seq_similarity	Complete ORF loss
								GAS2	Type_1	Type_2	ENST00000648096.1	ENST00000454584.6	domains_identified	Domain loss
								FAM178B	Type_1	Type_2	ENST00000490605.3	ENST00000520074.1	coding_potential	Transcript is coding
								FAM178B	Type_1	Type_2	ENST00000490605.3	ENST00000520074.1	ORF_seq_similarity	Complete ORF gain
								FAM178B	Type_1	Type_2	ENST00000490605.3	ENST00000520074.1	domains_identified	Domain gain
								CD300LG	Type_1	Type_2	ENST00000317310.5	ENST00000589212.1	coding_potential	Transcript is coding
								CD300LG	Type_1	Type_2	ENST00000317310.5	ENST00000589212.1	ORF_seq_similarity	Complete ORF gain
								CD300LG	Type_1	Type_2	ENST00000317310.5	ENST00000589212.1	domains_identified	Domain gain
								ACSL6	Type_1	Type_2	ENST00000357096.5	ENST00000651356.1	ORF_seq_similarity	ORF is shorter
								ACSL6	Type_1	Type_2	ENST00000357096.5	ENST00000651356.1	domains_identified	Domain gain
								ACSL6	Type_1	Type_2	ENST00000484870.1	ENST00000651356.1	coding_potential	Transcript is Noncoding
								ACSL6	Type_1	Type_2	ENST00000484870.1	ENST00000651356.1	ORF_seq_similarity	Complete ORF loss
								ACSL6	Type_1	Type_2	ENST00000484870.1	ENST00000651356.1	domains_identified	Domain loss
								AC009093.3	Type_1	Type_2	ENST00000562618.1	ENST00000565800.1	intron_retention	Intron retention gain
								GAB3	Type_1	Type_2	ENST00000424127.3	ENST00000454973.1	coding_potential	Transcript is coding
								GAB3	Type_1	Type_2	ENST00000424127.3	ENST00000454973.1	ORF_seq_similarity	Complete ORF gain
								GAB3	Type_1	Type_2	ENST00000424127.3	ENST00000454973.1	domains_identified	Domain gain
								NBPF20	Type_1	Type_2	ENST00000594479.7	ENST00000620821.1	intron_retention	Intron retention loss
								NBPF20	Type_1	Type_2	ENST00000594479.7	ENST00000620821.1	ORF_seq_similarity	ORF is longer
								NBPF20	Type_1	Type_2	ENST00000594479.7	ENST00000620821.1	NMD_status	NMD insensitive
								NBPF20	Type_1	Type_2	ENST00000594479.7	ENST00000620821.1	domains_identified	Domain gain
								C9orf24	Type_1	Type_2	ENST00000481295.5	ENST00000297623.7	coding_potential	Transcript is Noncoding
								C9orf24	Type_1	Type_2	ENST00000481295.5	ENST00000297623.7	ORF_seq_similarity	Complete ORF loss
								C9orf24	Type_1	Type_2	ENST00000481295.5	ENST00000297623.7	domains_identified	Domain loss
								CRTAM	Type_1	Type_2	ENST00000227348.9	ENST00000533709.1	ORF_seq_similarity	ORF is longer
								CRTAM	Type_1	Type_2	ENST00000227348.9	ENST00000533709.1	domains_identified	Domain gain
								CKMT1B	Type_1	Type_2	ENST00000300283.10	ENST00000437534.3	ORF_seq_similarity	ORF is longer
								CKMT1B	Type_1	Type_2	ENST00000300283.10	ENST00000437534.3	NMD_status	NMD insensitive
								NOD2	Type_1	Type_2	ENST00000300589.6	ENST00000646677.1	ORF_seq_similarity	ORF is longer
								NOD2	Type_1	Type_2	ENST00000300589.6	ENST00000646677.1	NMD_status	NMD insensitive
								NOD2	Type_1	Type_2	ENST00000300589.6	ENST00000646677.1	domains_identified	Domain gain
								TNXB	Type_1	Type_2	ENST00000490077.5	ENST00000442721.1	coding_potential	Transcript is coding
								NOTCH2NLC	Type_1	Type_2	ENST00000650865.1	ENST00000578189.1	ORF_seq_similarity	ORF is longer
								GDPD2	Type_1	Type_2	ENST00000538649.5	ENST00000453994.6	ORF_seq_similarity	ORF is shorter
								XCR1	Type_1	Type_2	ENST00000309285.3	ENST00000395946.2	coding_potential	Transcript is coding
								XCR1	Type_1	Type_2	ENST00000309285.3	ENST00000395946.2	ORF_seq_similarity	Complete ORF gain
								XCR1	Type_1	Type_2	ENST00000309285.3	ENST00000395946.2	domains_identified	Domain gain
								B3GNT4	Type_1	Type_2	ENST00000324189.5	ENST00000545141.1	intron_retention	Intron retention gain
								B3GNT4	Type_1	Type_2	ENST00000324189.5	ENST00000545141.1	coding_potential	Transcript is coding
								B3GNT4	Type_1	Type_2	ENST00000324189.5	ENST00000545141.1	ORF_seq_similarity	Complete ORF gain
								B3GNT4	Type_1	Type_2	ENST00000324189.5	ENST00000545141.1	domains_identified	Domain gain
								GDPD3	Type_1	Type_2	ENST00000406256.8	ENST00000360688.3	intron_retention	Intron retention loss
								GDPD3	Type_1	Type_2	ENST00000406256.8	ENST00000360688.3	ORF_seq_similarity	Complete ORF gain
								GDPD3	Type_1	Type_2	ENST00000406256.8	ENST00000360688.3	domains_identified	Domain gain
								NMNAT3	Type_1	Type_2	ENST00000339837.9	ENST00000645507.1	ORF_seq_similarity	ORF is longer
								MMP25	Type_1	Type_2	ENST00000336577.9	ENST00000575441.1	coding_potential	Transcript is coding
								MMP25	Type_1	Type_2	ENST00000336577.9	ENST00000575441.1	ORF_seq_similarity	Complete ORF gain
								MMP25	Type_1	Type_2	ENST00000336577.9	ENST00000575441.1	domains_identified	Domain gain
								HLA-A	Type_1	Type_2	ENST00000376809.10	ENST00000376802.2	ORF_seq_similarity	ORF is longer
								HLA-A	Type_1	Type_2	ENST00000376809.10	ENST00000376802.2	domains_identified	Domain gain
								MZB1	Type_1	Type_2	ENST00000302125.9	ENST00000509591.1	coding_potential	Transcript is coding
								MZB1	Type_1	Type_2	ENST00000302125.9	ENST00000509591.1	ORF_seq_similarity	Complete ORF gain
								MZB1	Type_1	Type_2	ENST00000302125.9	ENST00000509591.1	domains_identified	Domain gain
								IFITM10	Type_1	Type_2	ENST00000382123.1	ENST00000486852.1	coding_potential	Transcript is coding
								IFITM10	Type_1	Type_2	ENST00000382123.1	ENST00000486852.1	ORF_seq_similarity	Complete ORF gain
								EVI5	Type_1	Type_2	ENST00000370331.5	ENST00000466778.2	coding_potential	Transcript is coding
								EVI5	Type_1	Type_2	ENST00000370331.5	ENST00000466778.2	ORF_seq_similarity	Complete ORF gain
								EVI5	Type_1	Type_2	ENST00000370331.5	ENST00000466778.2	domains_identified	Domain gain
								AC011448.1	Type_1	Type_2	ENST00000555938.1	ENST00000586674.1	ORF_seq_similarity	Complete ORF gain
								AC011448.1	Type_1	Type_2	ENST00000555938.1	ENST00000586674.1	domains_identified	Domain gain
								PRDM16	Type_1	Type_2	ENST00000270722.10	ENST00000606170.1	coding_potential	Transcript is coding
								PRDM16	Type_1	Type_2	ENST00000270722.10	ENST00000606170.1	ORF_seq_similarity	Complete ORF gain
								PRDM16	Type_1	Type_2	ENST00000270722.10	ENST00000606170.1	domains_identified	Domain gain
								SLC5A10	Type_1	Type_2	ENST00000317977.10	ENST00000395645.3	domains_identified	Domain gain
								AC004816.1	Type_1	Type_2	ENST00000554032.1	ENST00000661317.1	intron_retention	Intron retention loss
								PTCH2	Type_1	Type_2	ENST00000372192.4	ENST00000438067.5	coding_potential	Transcript is coding
								PTCH2	Type_1	Type_2	ENST00000372192.4	ENST00000438067.5	ORF_seq_similarity	Complete ORF gain
								PTCH2	Type_1	Type_2	ENST00000372192.4	ENST00000438067.5	domains_identified	Domain gain
								KCTD11	Type_1	Type_2	ENST00000333751.6	ENST00000576980.2	ORF_seq_similarity	ORF is longer
								CHEK1	Type_1	Type_2	ENST00000438015.6	ENST00000525396.5	intron_retention	Intron retention gain
								CHEK1	Type_1	Type_2	ENST00000438015.6	ENST00000525396.5	coding_potential	Transcript is coding
								CHEK1	Type_1	Type_2	ENST00000438015.6	ENST00000525396.5	ORF_seq_similarity	Complete ORF gain
								CHEK1	Type_1	Type_2	ENST00000438015.6	ENST00000525396.5	domains_identified	Domain gain
								CROCCP3	Type_1	Type_2	ENST00000263511.8	ENST00000589964.1	coding_potential	Transcript is coding
								AL078459.1	Type_1	Type_2	ENST00000654182.1	ENST00000426125.1	coding_potential	Transcript is coding
								N4BP2	Type_1	Type_2	ENST00000261435.11	ENST00000511480.5	ORF_seq_similarity	ORF is longer
								N4BP2	Type_1	Type_2	ENST00000261435.11	ENST00000511480.5	NMD_status	NMD insensitive
								N4BP2	Type_1	Type_2	ENST00000261435.11	ENST00000511480.5	domains_identified	Domain gain
								TMF1	Type_1	Type_2	ENST00000398559.7	ENST00000477872.1	coding_potential	Transcript is coding
								TMF1	Type_1	Type_2	ENST00000398559.7	ENST00000477872.1	ORF_seq_similarity	Complete ORF gain
								TMF1	Type_1	Type_2	ENST00000398559.7	ENST00000477872.1	domains_identified	Domain gain
								SDS	Type_1	Type_2	ENST00000257549.9	ENST00000553112.5	ORF_seq_similarity	Complete ORF gain
								SDS	Type_1	Type_2	ENST00000257549.9	ENST00000553112.5	domains_identified	Domain gain
								LRRC70	Type_1	Type_2	ENST00000448151.2	ENST00000334994.6	intron_retention	Intron retention loss
								LRRC70	Type_1	Type_2	ENST00000448151.2	ENST00000334994.6	ORF_seq_similarity	Complete ORF loss
								LRRC70	Type_1	Type_2	ENST00000448151.2	ENST00000334994.6	domains_identified	Domain loss
								CPNE5	Type_1	Type_2	ENST00000393189.2	ENST00000244751.7	ORF_seq_similarity	ORF is shorter
								CPNE5	Type_1	Type_2	ENST00000393189.2	ENST00000244751.7	domains_identified	Domain loss
								CPNE5	Type_1	Type_2	ENST00000393189.2	ENST00000633136.1	coding_potential	Transcript is coding
								CPNE5	Type_1	Type_2	ENST00000393189.2	ENST00000633136.1	ORF_seq_similarity	Complete ORF gain
								CPNE5	Type_1	Type_2	ENST00000393189.2	ENST00000633136.1	domains_identified	Domain gain
								CFI	Type_1	Type_2	ENST00000394634.6	ENST00000504853.3	ORF_seq_similarity	Complete ORF gain
								CFI	Type_1	Type_2	ENST00000394634.6	ENST00000504853.3	domains_identified	Domain gain
								CHRNA1	Type_1	Type_2	ENST00000348749.9	ENST00000416004.1	coding_potential	Transcript is coding
								CHRNA1	Type_1	Type_2	ENST00000348749.9	ENST00000416004.1	ORF_seq_similarity	Complete ORF gain
								CHRNA1	Type_1	Type_2	ENST00000348749.9	ENST00000416004.1	domains_identified	Domain gain
								PCSK5	Type_1	Type_2	ENST00000376752.8	ENST00000376767.7	ORF_seq_similarity	ORF is longer
								PCSK5	Type_1	Type_2	ENST00000376752.8	ENST00000376767.7	domains_identified	Domain gain
								KIF25	Type_1	Type_2	ENST00000645382.1	ENST00000351261.4	ORF_seq_similarity	Complete ORF loss
								KIF25	Type_1	Type_2	ENST00000645382.1	ENST00000351261.4	domains_identified	Domain loss
								ZSWIM9	Type_1	Type_2	ENST00000614654.2	ENST00000593921.1	coding_potential	Transcript is coding
								ZSWIM9	Type_1	Type_2	ENST00000614654.2	ENST00000593921.1	ORF_seq_similarity	Complete ORF gain
								ZSWIM9	Type_1	Type_2	ENST00000614654.2	ENST00000593921.1	domains_identified	Domain gain
								NEK2	Type_1	Type_2	ENST00000366999.9	ENST00000366998.4	ORF_seq_similarity	ORF is longer
								GRAP	Type_1	Type_2	ENST00000284154.9	ENST00000395635.5	ORF_seq_similarity	ORF is longer
								GRAP	Type_1	Type_2	ENST00000284154.9	ENST00000395635.5	domains_identified	Domain gain
								GRAP	Type_1	Type_2	ENST00000284154.9	ENST00000583020.1	coding_potential	Transcript is coding
								GRAP	Type_1	Type_2	ENST00000284154.9	ENST00000583020.1	ORF_seq_similarity	Complete ORF gain
								GRAP	Type_1	Type_2	ENST00000284154.9	ENST00000583020.1	domains_identified	Domain gain
								PLD4	Type_1	Type_2	ENST00000553861.1	ENST00000472702.1	intron_retention	Intron retention gain
								GUSBP1	Type_1	Type_2	ENST00000508973.5	ENST00000449061.2	coding_potential	Transcript is Noncoding
								GAREM2	Type_1	Type_2	ENST00000401533.7	ENST00000496070.1	intron_retention	Intron retention gain
								GAREM2	Type_1	Type_2	ENST00000401533.7	ENST00000496070.1	coding_potential	Transcript is coding
								GAREM2	Type_1	Type_2	ENST00000401533.7	ENST00000496070.1	ORF_seq_similarity	Complete ORF gain
								GAREM2	Type_1	Type_2	ENST00000401533.7	ENST00000496070.1	domains_identified	Domain gain
								LINC01667	Type_1	Type_2	ENST00000623919.1	ENST00000651050.1	intron_retention	Intron retention loss
								AC087632.2	Type_1	Type_2	ENST00000634529.1	ENST00000634847.2	coding_potential	Transcript is Noncoding
								KLRG1	Type_1	Type_2	ENST00000356986.8	ENST00000266551.8	intron_retention	Intron retention gain
								WDR54	Type_1	Type_2	ENST00000348227.4	ENST00000482605.1	intron_retention	Intron retention loss
								WDR54	Type_1	Type_2	ENST00000348227.4	ENST00000482605.1	coding_potential	Transcript is coding
								WDR54	Type_1	Type_2	ENST00000348227.4	ENST00000482605.1	ORF_seq_similarity	Complete ORF gain
								TNFRSF17	Type_1	Type_2	ENST00000053243.6	ENST00000562385.1	coding_potential	Transcript is coding
								TNFRSF17	Type_1	Type_2	ENST00000053243.6	ENST00000562385.1	ORF_seq_similarity	Complete ORF gain
								TNFRSF17	Type_1	Type_2	ENST00000053243.6	ENST00000562385.1	domains_identified	Domain gain
								PIK3C2G	Type_1	Type_2	ENST00000538779.5	ENST00000535651.5	ORF_seq_similarity	ORF is longer
								PIK3C2G	Type_1	Type_2	ENST00000538779.5	ENST00000535651.5	domains_identified	Domain gain
								CTSW	Type_1	Type_2	ENST00000307886.8	ENST00000524681.1	coding_potential	Transcript is coding
								CTSW	Type_1	Type_2	ENST00000307886.8	ENST00000524681.1	ORF_seq_similarity	Complete ORF gain
								CTSW	Type_1	Type_2	ENST00000307886.8	ENST00000524681.1	domains_identified	Domain gain
								DEPDC1B	Type_1	Type_2	ENST00000265036.10	ENST00000512452.1	coding_potential	Transcript is coding
								DEPDC1B	Type_1	Type_2	ENST00000265036.10	ENST00000512452.1	ORF_seq_similarity	Complete ORF gain
								DEPDC1B	Type_1	Type_2	ENST00000265036.10	ENST00000512452.1	domains_identified	Domain gain
								ADAP1	Type_1	Type_2	ENST00000617043.4	ENST00000478000.5	ORF_seq_similarity	Complete ORF gain
								ADAP1	Type_1	Type_2	ENST00000617043.4	ENST00000478000.5	domains_identified	Domain gain
								CARD9	Type_1	Type_2	ENST00000371732.9	ENST00000481053.5	intron_retention	Intron retention loss
								CARD9	Type_1	Type_2	ENST00000371732.9	ENST00000481053.5	ORF_seq_similarity	Complete ORF gain
								CARD9	Type_1	Type_2	ENST00000371732.9	ENST00000481053.5	domains_identified	Domain gain
								RALGAPA2	Type_1	Type_2	ENST00000430436.5	ENST00000202677.12	ORF_seq_similarity	Complete ORF loss
								RALGAPA2	Type_1	Type_2	ENST00000430436.5	ENST00000202677.12	domains_identified	Domain loss
								KLF5	Type_1	Type_2	ENST00000539231.5	ENST00000464404.2	coding_potential	Transcript is coding
								KLF5	Type_1	Type_2	ENST00000539231.5	ENST00000464404.2	ORF_seq_similarity	Complete ORF gain
								KLF5	Type_1	Type_2	ENST00000539231.5	ENST00000464404.2	domains_identified	Domain gain
								USF3	Type_1	Type_2	ENST00000491165.5	ENST00000316407.9	intron_retention	Intron retention loss
								USF3	Type_1	Type_2	ENST00000491165.5	ENST00000316407.9	coding_potential	Transcript is Noncoding
								USF3	Type_1	Type_2	ENST00000491165.5	ENST00000316407.9	ORF_seq_similarity	Complete ORF loss
								USF3	Type_1	Type_2	ENST00000491165.5	ENST00000316407.9	domains_identified	Domain loss
								ARSJ	Type_1	Type_2	ENST00000315366.8	ENST00000636527.1	intron_retention	Intron retention gain
								ARSJ	Type_1	Type_2	ENST00000315366.8	ENST00000636527.1	coding_potential	Transcript is coding
								ARSJ	Type_1	Type_2	ENST00000315366.8	ENST00000636527.1	ORF_seq_similarity	Complete ORF gain
								ARSJ	Type_1	Type_2	ENST00000315366.8	ENST00000636527.1	domains_identified	Domain gain
								CLPB	Type_1	Type_2	ENST00000538021.5	ENST00000538039.6	ORF_seq_similarity	ORF is shorter
								CLPB	Type_1	Type_2	ENST00000538021.5	ENST00000538039.6	NMD_status	NMD sensitive
								CLPB	Type_1	Type_2	ENST00000538021.5	ENST00000538039.6	domains_identified	Domain loss
								NBPF26	Type_1	Type_2	ENST00000652444.1	ENST00000615219.4	intron_retention	Intron retention switch
								NBPF26	Type_1	Type_2	ENST00000652444.1	ENST00000615219.4	ORF_seq_similarity	ORF is longer
								NBPF26	Type_1	Type_2	ENST00000652444.1	ENST00000615219.4	NMD_status	NMD insensitive
								NBPF26	Type_1	Type_2	ENST00000652444.1	ENST00000615219.4	domains_identified	Domain gain
								BOLA2	Type_1	Type_2	ENST00000330978.3	ENST00000380596.9	NMD_status	NMD insensitive
								ZP3	Type_1	Type_2	ENST00000466960.5	ENST00000467555.1	coding_potential	Transcript is coding
								TGM2	Type_1	Type_2	ENST00000361475.7	ENST00000474777.1	ORF_seq_similarity	Complete ORF gain
								TGM2	Type_1	Type_2	ENST00000361475.7	ENST00000474777.1	domains_identified	Domain gain
								AC091057.6	Type_1	Type_2	ENST00000428041.4	ENST00000646747.1	coding_potential	Transcript is coding
								AC091057.6	Type_1	Type_2	ENST00000428041.4	ENST00000646747.1	ORF_seq_similarity	Complete ORF gain
								AC091057.6	Type_1	Type_2	ENST00000428041.4	ENST00000646747.1	domains_identified	Domain gain
								ZNF404	Type_1	Type_2	ENST00000324394.7	ENST00000588094.1	coding_potential	Transcript is coding
								ZNF404	Type_1	Type_2	ENST00000324394.7	ENST00000588094.1	ORF_seq_similarity	Complete ORF gain
								ZNF404	Type_1	Type_2	ENST00000324394.7	ENST00000588094.1	domains_identified	Domain gain
								AC005515.1	Type_1	Type_2	ENST00000412609.5	ENST00000458539.5	intron_retention	Intron retention gain
								AC005515.1	Type_1	Type_2	ENST00000412609.5	ENST00000458539.5	coding_potential	Transcript is coding
								AC005515.1	Type_1	Type_2	ENST00000598164.2	ENST00000458539.5	intron_retention	Intron retention loss
								AC005515.1	Type_1	Type_2	ENST00000598164.2	ENST00000458539.5	coding_potential	Transcript is coding
								CKLF-CMTM1	Type_1	Type_2	ENST00000616804.5	ENST00000527845.1	coding_potential	Transcript is coding
								CKLF-CMTM1	Type_1	Type_2	ENST00000616804.5	ENST00000527845.1	ORF_seq_similarity	Complete ORF gain
								C5AR1	Type_1	Type_2	ENST00000355085.4	ENST00000595501.5	coding_potential	Transcript is coding
								C5AR1	Type_1	Type_2	ENST00000355085.4	ENST00000595501.5	ORF_seq_similarity	Complete ORF gain
								C5AR1	Type_1	Type_2	ENST00000355085.4	ENST00000595501.5	domains_identified	Domain gain
								CNN1	Type_1	Type_2	ENST00000252456.7	ENST00000588468.1	intron_retention	Intron retention gain
								CNN1	Type_1	Type_2	ENST00000252456.7	ENST00000588468.1	coding_potential	Transcript is coding
								CNN1	Type_1	Type_2	ENST00000252456.7	ENST00000588468.1	ORF_seq_similarity	Complete ORF gain
								CNN1	Type_1	Type_2	ENST00000252456.7	ENST00000588468.1	domains_identified	Domain gain
								MPP4	Type_1	Type_2	ENST00000396886.7	ENST00000483841.2	ORF_seq_similarity	Complete ORF gain
								MPP4	Type_1	Type_2	ENST00000396886.7	ENST00000483841.2	domains_identified	Domain gain
								KDF1	Type_1	Type_2	ENST00000320567.6	ENST00000616918.1	intron_retention	Intron retention gain
								KDF1	Type_1	Type_2	ENST00000320567.6	ENST00000616918.1	ORF_seq_similarity	ORF is longer
								KDF1	Type_1	Type_2	ENST00000320567.6	ENST00000616918.1	NMD_status	NMD insensitive
								JSRP1	Type_1	Type_2	ENST00000300961.10	ENST00000593238.2	coding_potential	Transcript is coding
								JSRP1	Type_1	Type_2	ENST00000300961.10	ENST00000593238.2	ORF_seq_similarity	Complete ORF gain
								JSRP1	Type_1	Type_2	ENST00000300961.10	ENST00000593238.2	domains_identified	Domain gain
								ADH1B	Type_1	Type_2	ENST00000305046.13	ENST00000515694.4	intron_retention	Intron retention loss
								ADH1B	Type_1	Type_2	ENST00000305046.13	ENST00000515694.4	ORF_seq_similarity	Complete ORF gain
								ADH1B	Type_1	Type_2	ENST00000305046.13	ENST00000515694.4	domains_identified	Domain gain
								TMEM99	Type_1	Type_2	ENST00000654043.1	ENST00000670968.1	coding_potential	Transcript is coding
								APOL4	Type_1	Type_2	ENST00000616056.4	ENST00000613247.4	ORF_seq_similarity	Complete ORF gain
								APOL4	Type_1	Type_2	ENST00000616056.4	ENST00000613247.4	domains_identified	Domain gain
								PLA2G4B	Type_1	Type_2	ENST00000458483.3	ENST00000483748.5	intron_retention	Intron retention loss
								PLA2G4B	Type_1	Type_2	ENST00000458483.3	ENST00000483748.5	ORF_seq_similarity	Complete ORF gain
								PLA2G4B	Type_1	Type_2	ENST00000458483.3	ENST00000483748.5	domains_identified	Domain gain
								TEAD1	Type_1	Type_2	ENST00000527636.6	ENST00000526600.1	ORF_seq_similarity	ORF is longer
								TEAD1	Type_1	Type_2	ENST00000527636.6	ENST00000526600.1	domains_identified	Domain gain
								PSCA	Type_1	Type_2	ENST00000301258.5	ENST00000505305.1	coding_potential	Transcript is coding
								PSCA	Type_1	Type_2	ENST00000301258.5	ENST00000505305.1	ORF_seq_similarity	Complete ORF gain
								PSCA	Type_1	Type_2	ENST00000301258.5	ENST00000505305.1	domains_identified	Domain gain
								WDFY2	Type_1	Type_2	ENST00000298125.7	ENST00000460145.2	coding_potential	Transcript is coding
								WDFY2	Type_1	Type_2	ENST00000298125.7	ENST00000460145.2	ORF_seq_similarity	Complete ORF gain
								WDFY2	Type_1	Type_2	ENST00000298125.7	ENST00000460145.2	domains_identified	Domain gain
								APELA	Type_1	Type_2	ENST00000507152.6	ENST00000510062.5	intron_retention	Intron retention gain
								APELA	Type_1	Type_2	ENST00000507152.6	ENST00000515275.1	intron_retention	Intron retention gain
								AL669942.1	Type_1	Type_2	ENST00000611307.1	ENST00000620585.4	intron_retention	Intron retention loss
								GPD1	Type_1	Type_2	ENST00000301149.8	ENST00000547964.5	coding_potential	Transcript is coding
								GPD1	Type_1	Type_2	ENST00000301149.8	ENST00000547964.5	ORF_seq_similarity	Complete ORF gain
								GPD1	Type_1	Type_2	ENST00000301149.8	ENST00000547964.5	domains_identified	Domain gain
								SLC22A18AS	Type_1	Type_2	ENST00000455942.3	ENST00000625099.4	ORF_seq_similarity	ORF is shorter
								NOVA1	Type_1	Type_2	ENST00000547619.5	ENST00000539517.7	ORF_seq_similarity	ORF is shorter
								NOVA1	Type_1	Type_2	ENST00000547619.5	ENST00000539517.7	domains_identified	Domain loss
								AIM2	Type_1	Type_2	ENST00000368130.9	ENST00000368129.3	coding_potential	Transcript is coding
								AIM2	Type_1	Type_2	ENST00000368130.9	ENST00000368129.3	ORF_seq_similarity	Complete ORF gain
								AIM2	Type_1	Type_2	ENST00000368130.9	ENST00000368129.3	domains_identified	Domain gain
								MDN1	Type_1	Type_2	ENST00000487831.2	ENST00000369393.8	intron_retention	Intron retention loss
								MDN1	Type_1	Type_2	ENST00000487831.2	ENST00000369393.8	coding_potential	Transcript is Noncoding
								MDN1	Type_1	Type_2	ENST00000487831.2	ENST00000369393.8	ORF_seq_similarity	Complete ORF loss
								MDN1	Type_1	Type_2	ENST00000487831.2	ENST00000369393.8	domains_identified	Domain loss
								LY6K	Type_1	Type_2	ENST00000519387.1	ENST00000292430.10	ORF_seq_similarity	ORF is shorter
								SPAG1	Type_1	Type_2	ENST00000251809.4	ENST00000519409.1	intron_retention	Intron retention gain
								SPAG1	Type_1	Type_2	ENST00000251809.4	ENST00000519409.1	coding_potential	Transcript is coding
								SPAG1	Type_1	Type_2	ENST00000251809.4	ENST00000519409.1	ORF_seq_similarity	Complete ORF gain
								SPAG1	Type_1	Type_2	ENST00000251809.4	ENST00000519409.1	domains_identified	Domain gain
								ZBTB16	Type_1	Type_2	ENST00000335953.9	ENST00000541602.5	ORF_seq_similarity	Complete ORF gain
								ZBTB16	Type_1	Type_2	ENST00000335953.9	ENST00000541602.5	domains_identified	Domain gain
								PCDH12	Type_1	Type_2	ENST00000231484.3	ENST00000512221.2	coding_potential	Transcript is coding
								PCDH12	Type_1	Type_2	ENST00000231484.3	ENST00000512221.2	ORF_seq_similarity	Complete ORF gain
								PCDH12	Type_1	Type_2	ENST00000231484.3	ENST00000512221.2	domains_identified	Domain gain
								PRKACB	Type_1	Type_2	ENST00000370685.7	ENST00000370689.6	ORF_seq_similarity	ORF is longer
								AC009879.3	Type_1	Type_2	ENST00000480040.5	ENST00000482608.6	coding_potential	Transcript is coding
								KRT10	Type_1	Type_2	ENST00000269576.6	ENST00000635956.1	coding_potential	Transcript is coding
								KRT10	Type_1	Type_2	ENST00000269576.6	ENST00000635956.1	ORF_seq_similarity	Complete ORF gain
								KRT10	Type_1	Type_2	ENST00000269576.6	ENST00000635956.1	domains_identified	Domain gain
								GNRH1	Type_1	Type_2	ENST00000421054.7	ENST00000276414.4	intron_retention	Intron retention loss
								FAM83A	Type_1	Type_2	ENST00000276699.10	ENST00000536633.2	intron_retention	Intron retention loss
								KRT9	Type_1	Type_2	ENST00000246662.9	ENST00000588431.1	intron_retention	Intron retention gain
								KRT9	Type_1	Type_2	ENST00000246662.9	ENST00000588431.1	ORF_seq_similarity	ORF is longer
								TLCD5	Type_1	Type_2	ENST00000375095.2	ENST00000531346.1	coding_potential	Transcript is coding
								TLCD5	Type_1	Type_2	ENST00000375095.2	ENST00000531346.1	ORF_seq_similarity	Complete ORF gain
								TLCD5	Type_1	Type_2	ENST00000375095.2	ENST00000531346.1	domains_identified	Domain gain
								ACADL	Type_1	Type_2	ENST00000652584.1	ENST00000233710.4	ORF_seq_similarity	Complete ORF loss
								ACADL	Type_1	Type_2	ENST00000652584.1	ENST00000233710.4	domains_identified	Domain loss
								SP140	Type_1	Type_2	ENST00000392045.8	ENST00000441657.1	coding_potential	Transcript is coding
								SP140	Type_1	Type_2	ENST00000392045.8	ENST00000441657.1	ORF_seq_similarity	Complete ORF gain
								SP140	Type_1	Type_2	ENST00000392045.8	ENST00000441657.1	domains_identified	Domain gain
								C1orf53	Type_1	Type_2	ENST00000367393.8	ENST00000542800.1	coding_potential	Transcript is coding
								C1orf53	Type_1	Type_2	ENST00000367393.8	ENST00000542800.1	ORF_seq_similarity	Complete ORF gain
								C1orf53	Type_1	Type_2	ENST00000367393.8	ENST00000542800.1	domains_identified	Domain gain
								EXOC3L4	Type_1	Type_2	ENST00000559693.1	ENST00000560102.1	intron_retention	Intron retention gain
								EXOC3L4	Type_1	Type_2	ENST00000559693.1	ENST00000560102.1	coding_potential	Transcript is coding
								ADARB2	Type_1	Type_2	ENST00000381312.6	ENST00000490172.1	coding_potential	Transcript is coding
								ADARB2	Type_1	Type_2	ENST00000381312.6	ENST00000490172.1	ORF_seq_similarity	Complete ORF gain
								ADARB2	Type_1	Type_2	ENST00000381312.6	ENST00000490172.1	domains_identified	Domain gain
								AL354740.1	Type_1	Type_2	ENST00000586726.3	ENST00000429998.3	intron_retention	Intron retention loss
								KLK10	Type_1	Type_2	ENST00000358789.8	ENST00000601467.1	coding_potential	Transcript is coding
								KLK10	Type_1	Type_2	ENST00000358789.8	ENST00000601467.1	ORF_seq_similarity	Complete ORF gain
								KLK10	Type_1	Type_2	ENST00000358789.8	ENST00000601467.1	domains_identified	Domain gain
								KNL1	Type_1	Type_2	ENST00000526913.5	ENST00000346991.9	intron_retention	Intron retention loss
								KNL1	Type_1	Type_2	ENST00000526913.5	ENST00000346991.9	ORF_seq_similarity	Complete ORF loss
								KNL1	Type_1	Type_2	ENST00000526913.5	ENST00000346991.9	domains_identified	Domain loss
								CEACAM6	Type_1	Type_2	ENST00000199764.7	ENST00000595740.1	coding_potential	Transcript is coding
								CEACAM6	Type_1	Type_2	ENST00000199764.7	ENST00000595740.1	ORF_seq_similarity	Complete ORF gain
								CEACAM6	Type_1	Type_2	ENST00000199764.7	ENST00000595740.1	domains_identified	Domain gain
								CLEC4E	Type_1	Type_2	ENST00000545274.5	ENST00000299663.8	ORF_seq_similarity	ORF is shorter
								NIPAL1	Type_1	Type_2	ENST00000295461.10	ENST00000513724.1	intron_retention	Intron retention gain
								NIPAL1	Type_1	Type_2	ENST00000295461.10	ENST00000513724.1	coding_potential	Transcript is coding
								NIPAL1	Type_1	Type_2	ENST00000295461.10	ENST00000513724.1	ORF_seq_similarity	Complete ORF gain
								NIPAL1	Type_1	Type_2	ENST00000295461.10	ENST00000513724.1	domains_identified	Domain gain
								RAET1G	Type_1	Type_2	ENST00000367360.7	ENST00000479265.1	ORF_seq_similarity	ORF is longer
								KCNMB3	Type_1	Type_2	ENST00000349697.2	ENST00000392685.6	intron_retention	Intron retention loss
								RHD	Type_1	Type_2	ENST00000328664.9	ENST00000622561.4	NMD_status	NMD insensitive
								HSD3B1	Type_1	Type_2	ENST00000369413.8	ENST00000487520.1	intron_retention	Intron retention gain
								HSD3B1	Type_1	Type_2	ENST00000369413.8	ENST00000487520.1	coding_potential	Transcript is coding
								HSD3B1	Type_1	Type_2	ENST00000369413.8	ENST00000487520.1	ORF_seq_similarity	Complete ORF gain
								HSD3B1	Type_1	Type_2	ENST00000369413.8	ENST00000487520.1	domains_identified	Domain gain
								OSGIN1	Type_1	Type_2	ENST00000393306.6	ENST00000565123.5	ORF_seq_similarity	ORF is longer
								MAPT	Type_1	Type_2	ENST00000446361.7	ENST00000577017.1	coding_potential	Transcript is coding
								MAPT	Type_1	Type_2	ENST00000446361.7	ENST00000577017.1	ORF_seq_similarity	Complete ORF gain
								MAPT	Type_1	Type_2	ENST00000446361.7	ENST00000577017.1	domains_identified	Domain gain
								NCAPG	Type_1	Type_2	ENST00000514176.5	ENST00000251496.7	ORF_seq_similarity	ORF is shorter
								NCAPG	Type_1	Type_2	ENST00000514176.5	ENST00000251496.7	NMD_status	NMD sensitive
								NCAPG	Type_1	Type_2	ENST00000514176.5	ENST00000251496.7	domains_identified	Domain loss
								ZNF35	Type_1	Type_2	ENST00000296092.7	ENST00000396056.7	ORF_seq_similarity	ORF is shorter
								ZNF35	Type_1	Type_2	ENST00000296092.7	ENST00000396056.7	domains_identified	Domain loss
								C1QTNF7	Type_1	Type_2	ENST00000429690.5	ENST00000512144.1	coding_potential	Transcript is coding
								C1QTNF7	Type_1	Type_2	ENST00000429690.5	ENST00000512144.1	ORF_seq_similarity	Complete ORF gain
								C1QTNF7	Type_1	Type_2	ENST00000429690.5	ENST00000512144.1	domains_identified	Domain gain
								PCGF5	Type_1	Type_2	ENST00000490164.1	ENST00000614189.4	coding_potential	Transcript is Noncoding
								PCGF5	Type_1	Type_2	ENST00000490164.1	ENST00000614189.4	ORF_seq_similarity	Complete ORF loss
								PCGF5	Type_1	Type_2	ENST00000490164.1	ENST00000614189.4	domains_identified	Domain loss
								MAMSTR	Type_1	Type_2	ENST00000594582.1	ENST00000318083.11	ORF_seq_similarity	ORF is shorter
								MAMSTR	Type_1	Type_2	ENST00000594582.1	ENST00000318083.11	domains_identified	Domain loss
								DLX4	Type_1	Type_2	ENST00000240306.5	ENST00000411890.3	intron_retention	Intron retention loss
								DLX4	Type_1	Type_2	ENST00000240306.5	ENST00000411890.3	ORF_seq_similarity	ORF is longer
								AMDHD1	Type_1	Type_2	ENST00000548310.1	ENST00000553023.1	coding_potential	Transcript is coding
								TGM3	Type_1	Type_2	ENST00000381458.6	ENST00000463090.1	ORF_seq_similarity	Complete ORF gain
								TGM3	Type_1	Type_2	ENST00000381458.6	ENST00000463090.1	domains_identified	Domain gain
								RIMS2	Type_1	Type_2	ENST00000339750.3	ENST00000501515.6	coding_potential	Transcript is coding
								RIMS2	Type_1	Type_2	ENST00000339750.3	ENST00000501515.6	ORF_seq_similarity	Complete ORF gain
								RIMS2	Type_1	Type_2	ENST00000339750.3	ENST00000501515.6	domains_identified	Domain gain
								GLRX2	Type_1	Type_2	ENST00000367439.7	ENST00000608166.2	coding_potential	Transcript is coding
								GLRX2	Type_1	Type_2	ENST00000367439.7	ENST00000608166.2	ORF_seq_similarity	Complete ORF gain
								GLRX2	Type_1	Type_2	ENST00000367439.7	ENST00000608166.2	domains_identified	Domain gain
								WDR72	Type_1	Type_2	ENST00000557913.5	ENST00000614174.4	coding_potential	Transcript is coding
								WDR72	Type_1	Type_2	ENST00000557913.5	ENST00000614174.4	ORF_seq_similarity	Complete ORF gain
								WDR72	Type_1	Type_2	ENST00000557913.5	ENST00000614174.4	domains_identified	Domain gain
								SYS1-DBNDD2	Type_1	Type_2	ENST00000419593.5	ENST00000452133.1	coding_potential	Transcript is coding
								SYS1-DBNDD2	Type_1	Type_2	ENST00000419593.5	ENST00000452133.1	ORF_seq_similarity	Complete ORF gain
								SYS1-DBNDD2	Type_1	Type_2	ENST00000419593.5	ENST00000452133.1	domains_identified	Domain gain
								GREM1	Type_1	Type_2	ENST00000652365.1	ENST00000651154.1	coding_potential	Transcript is coding
								GREM1	Type_1	Type_2	ENST00000652365.1	ENST00000651154.1	ORF_seq_similarity	Complete ORF gain
								GREM1	Type_1	Type_2	ENST00000652365.1	ENST00000651154.1	domains_identified	Domain gain
								ZKSCAN1	Type_1	Type_2	ENST00000535170.5	ENST00000324306.11	intron_retention	Intron retention loss
								ZKSCAN1	Type_1	Type_2	ENST00000535170.5	ENST00000324306.11	ORF_seq_similarity	ORF is shorter
								ZKSCAN1	Type_1	Type_2	ENST00000535170.5	ENST00000324306.11	domains_identified	Domain loss
								CU638689.1	Type_1	Type_2	ENST00000623225.1	ENST00000624181.1	intron_retention	Intron retention loss
