# Supplementary material for: A Transcriptome-Wide Isoform Landscape of Melanocytic Nevi and Primary Melanomas Identifies Gene Isoforms Associated with Malignancy
Source: Int J Mol Sci. 2021 Jul 2;22(13):7165. doi: 10.3390/ijms22137165 (PMC8268681; doi:10.3390/ijms22137165)
Supplement: Supplementary file 1 [file ijms-22-07165-s001.zip › 05_Table_S3_30062021.xlsx]

## Sheet: Sheet1
Table S3: List of GO categories of isoform switches between the two comparison groups of melanomas versus benign melanocytic nevi and type 1 versus type 2 lesions.
Mel vs Nevi
geneSet	description	link	size	overlap	expect	enrichmentRatio	pValue	FDR	overlapId	userId
GO:0030198	extracellular matrix organization	http://amigo.geneontology.org/amigo/term/GO:0030198	347	18	5.78819	3.10978	2.24996e-05	0.18836	961;1289;1300;1302;2199;2620;2934;3249;3680;4317;4319;4322;5212;6696;7101;79625;169044;284217	COL11A2;COL5A1;GSN;MMP13;LAMA1;FBLN2;NDNF;CD47;SPP1;VIT;COL22A1;ITGA9;MMP8;MMP10;NR2E1;HPN;COL10A1;GAS2
GO:0043062	extracellular structure organization	http://amigo.geneontology.org/amigo/term/GO:0043062	400	19	6.67227	2.84761	4.46267e-05	0.18836	961;1289;1300;1302;2199;2620;2934;3249;3680;4317;4319;4322;5212;6382;6696;7101;79625;169044;284217	COL11A2;COL5A1;GSN;MMP13;LAMA1;FBLN2;SDC1;NDNF;CD47;SPP1;VIT;COL22A1;ITGA9;MMP8;MMP10;NR2E1;HPN;COL10A1;GAS2
GO:0009607	response to biotic stimulus	http://amigo.geneontology.org/amigo/term/GO:0009607	926	32	15.4463	2.07169	7.64561e-05	0.18836	728;961;974;2326;2643;3146;3265;3586;4435;6332;6364;6387;7425;8029;8091;8547;8564;8970;9227;9447;9474;9582;9641;10578;26253;29126;55024;57817;60509;116071;146956;100423062	AGBL5;LRAT;HMGB1;CXCL12;SCN7A;CLEC4E;CD274;FCN3;HMGA2;HAMP;IKBKE;AIM2;IL10;GNLY;CITED1;CCL20;ATG5;HRAS;CD79B;CD47;FMO1;VGF;C5AR1;EME1;GCH1;HIST1H2BJ;BANK1;BATF2;CUBN;KMO;APOBEC3B;IGLL5
GO:0051707	response to other organism	http://amigo.geneontology.org/amigo/term/GO:0051707	897	31	14.9626	2.07184	9.94999e-05	0.18836	728;961;974;2326;2643;3146;3265;3586;4435;6332;6364;6387;7425;8029;8091;8547;8564;8970;9227;9447;9474;9582;9641;10578;26253;29126;55024;57817;60509;116071;100423062	AGBL5;LRAT;HMGB1;CXCL12;SCN7A;CLEC4E;CD274;FCN3;HMGA2;HAMP;IKBKE;AIM2;IL10;GNLY;CITED1;CCL20;ATG5;HRAS;CD79B;CD47;FMO1;VGF;C5AR1;GCH1;HIST1H2BJ;BANK1;BATF2;CUBN;KMO;APOBEC3B;IGLL5
GO:0043207	response to external biotic stimulus	http://amigo.geneontology.org/amigo/term/GO:0043207	899	31	14.9959	2.06723	0.000103597	0.18836	728;961;974;2326;2643;3146;3265;3586;4435;6332;6364;6387;7425;8029;8091;8547;8564;8970;9227;9447;9474;9582;9641;10578;26253;29126;55024;57817;60509;116071;100423062	AGBL5;LRAT;HMGB1;CXCL12;SCN7A;CLEC4E;CD274;FCN3;HMGA2;HAMP;IKBKE;AIM2;IL10;GNLY;CITED1;CCL20;ATG5;HRAS;CD79B;CD47;FMO1;VGF;C5AR1;GCH1;HIST1H2BJ;BANK1;BATF2;CUBN;KMO;APOBEC3B;IGLL5
GO:0007155	cell adhesion	http://amigo.geneontology.org/amigo/term/GO:0007155	1369	41	22.8358	1.79542	0.000175765	0.258258	961;971;1289;2013;2185;2199;2934;3146;3586;3671;3680;3730;4155;4289;4907;4973;4974;5010;5212;6094;6387;6696;7052;7168;7704;9306;9404;11006;22854;22997;23114;29126;29851;54549;56100;79625;79937;79977;81792;284217;342184	COL5A1;GSN;LILRB4;LAMA1;HMGB1;CXCL12;FBLN2;NFASC;ROM1;ANOS1;CD274;ZBTB16;CNTNAP3;NT5E;IL10;SOCS6;TPM1;TGM2;NDNF;CD47;MKLN1;SPP1;IGSF9B;VIT;LPXN;FMN1;ICOS;PTK2B;CD72;OLR1;PCDHGB6;ITGA9;CLDN11;MBP;SDK2;OMG;EMP2;NTNG1;ADAMTS12;GRHL2;ISLR
GO:0022610	biological adhesion	http://amigo.geneontology.org/amigo/term/GO:0022610	1377	41	22.9693	1.78499	0.000198857	0.258258	961;971;1289;2013;2185;2199;2934;3146;3586;3671;3680;3730;4155;4289;4907;4973;4974;5010;5212;6094;6387;6696;7052;7168;7704;9306;9404;11006;22854;22997;23114;29126;29851;54549;56100;79625;79937;79977;81792;284217;342184	COL5A1;GSN;LILRB4;LAMA1;HMGB1;CXCL12;FBLN2;NFASC;ROM1;ANOS1;CD274;ZBTB16;CNTNAP3;NT5E;IL10;SOCS6;TPM1;TGM2;NDNF;CD47;MKLN1;SPP1;IGSF9B;VIT;LPXN;FMN1;ICOS;PTK2B;CD72;OLR1;PCDHGB6;ITGA9;CLDN11;MBP;SDK2;OMG;EMP2;NTNG1;ADAMTS12;GRHL2;ISLR
Type1 vs Type2
geneSet	description	link	size	overlap	expect	enrichmentRatio	pValue	FDR	overlapId	userId
GO:0006955	immune response	http://amigo.geneontology.org/amigo/term/GO:0006955	1919	83	45.0215	1.84356	1.9207e-08	0.000174611	26;136;383;608;640;728;923;1116;1235;1521;1776;2161;2212;2214;2357;2643;2829;3017;3385;3426;3437;3561;3575;3702;3821;3824;3955;3981;4035;4068;4155;4316;4589;4680;5337;5567;5583;5650;5699;5787;5873;6693;7100;7294;7409;7784;8547;8942;9447;9782;10068;10219;10261;10578;10663;10800;10850;11006;11027;22904;26253;51316;53916;54509;54923;55765;56253;57153;57817;64127;64170;64218;64386;79037;81030;89857;1…	CYSLTR1;PRKCH;LFNG;IL7R;TLR5;ITK;RHOF;SEMA4A;CD6;ICAM3;PSMB10;PVRIG;VAV1;AOC1;CXCR6;RAB4B;INAVA;KYNU;BLK;FCGR2A;ZBP1;ARG1;IGSF6;LIME1;KLHL6;FCRL3;IL18BP;PLD1;ADORA2B;DNASE1L3;PYHIN1;F12;FPR1;PLAC8;MMP7;KLRD1;IL2RG;SBNO2;MBP;KLRC1;RBM14-RBM4;GCH1;GNLY;LILRB4;LILRA2;SPN;CCR6;MUC7;TXK;LRP1;CHI3L1;HAMP;CD300LG;IFIT3;PTPRB;CRTAM;NOD2;XCR1;MMP25;CFI;CCL27;KLRG1;TNFRSF17;CTSW;CARD9;ZP3;C5AR1;MATR3;LIG4;…
GO:0006952	defense response	http://amigo.geneontology.org/amigo/term/GO:0006952	1518	67	35.6137	1.8813	2.92832e-07	0.00133107	136;383;728;923;1116;1235;1776;2161;2357;2643;2829;3017;3385;3426;3437;3702;3824;3949;4035;4068;4137;4316;4589;5567;5650;5739;5873;6289;6693;7036;7052;7100;7110;7294;7409;7784;8547;8942;9447;9782;10219;10578;10663;10800;11027;11262;22904;26253;26279;51316;55765;56253;56413;57817;59082;64127;64170;64386;81030;115352;116071;149628;164668;245937;353091;100137049;100526737	CYSLTR1;TLR5;ITK;CD6;ICAM3;VAV1;CXCR6;INAVA;KYNU;LTB4R2;ZBP1;ARG1;FCRL3;LDLR;PLA2G2D;ADORA2B;DNASE1L3;BATF2;PYHIN1;F12;FPR1;PLAC8;MMP7;KLRD1;CARD18;SBNO2;PTGIR;RBM14-RBM4;GCH1;GNLY;LILRA2;SPN;CCR6;MUC7;TXK;LRP1;CHI3L1;HAMP;IFIT3;TFR2;SAA2;CRTAM;NOD2;XCR1;MMP25;TMF1;CFI;KLRG1;CARD9;ZP3;TGM2;C5AR1;MATR3;RAB27A;PLA2G4B;DEFB124;AIM2;SH2D1A;HIST1H2BD;PRKACB;APOBEC3H;KLK7;SP140;FCN3;CLEC4E;RAET1G;MAPT
GO:0031349	positive regulation of defense response	http://amigo.geneontology.org/amigo/term/GO:0031349	427	28	10.0178	2.79502	1.03666e-06	0.00314144	136;383;923;2161;3385;3949;4068;4589;5567;5650;7052;7100;7294;7409;7784;9447;9782;11027;26253;55765;56253;64127;64170;81030;115352;149628;353091;100526737	TLR5;CD6;ICAM3;VAV1;INAVA;ZBP1;ARG1;FCRL3;LDLR;ADORA2B;PYHIN1;F12;RBM14-RBM4;LILRA2;MUC7;TXK;CRTAM;NOD2;CARD9;ZP3;TGM2;MATR3;AIM2;SH2D1A;PRKACB;KLK7;CLEC4E;RAET1G
GO:0002684	positive regulation of immune system process	http://amigo.geneontology.org/amigo/term/GO:0002684	979	46	22.9683	2.00276	5.43699e-06	0.0123569	136;383;640;728;923;1235;2212;2214;2357;3385;3426;3575;3702;4068;4589;5567;5583;5650;6693;7100;7294;7409;7704;7784;8547;9447;9782;11006;11027;26253;51237;54923;55765;56253;64127;64170;79037;81030;85477;89857;115352;140685;149628;353091;440712;100526737	PRKCH;IL7R;TLR5;ITK;ZBTB46;CD6;ICAM3;PVRIG;VAV1;INAVA;BLK;FCGR2A;ZBP1;ARG1;LIME1;KLHL6;FCRL3;SCIN;ADORA2B;PYHIN1;FPR1;RBM14-RBM4;LILRB4;LILRA2;SPN;CCR6;MUC7;TXK;CRTAM;NOD2;MZB1;CFI;CARD9;ZP3;C5AR1;MATR3;FCGR3A;RHEX;AIM2;SH2D1A;ZBTB16;PRKACB;KLK7;FCN3;CLEC4E;RAET1G
GO:0050778	positive regulation of immune response	http://amigo.geneontology.org/amigo/term/GO:0050778	706	36	16.5634	2.17346	1.08102e-05	0.0196552	136;640;728;2212;2214;2357;3385;3426;3702;4068;4589;5567;5583;5650;7100;7294;7409;7784;8547;9447;9782;11006;11027;26253;54923;55765;56253;64127;64170;79037;81030;89857;115352;149628;353091;100526737	PRKCH;TLR5;ITK;ICAM3;PVRIG;VAV1;INAVA;BLK;FCGR2A;ZBP1;LIME1;KLHL6;FCRL3;ADORA2B;PYHIN1;FPR1;RBM14-RBM4;LILRB4;LILRA2;MUC7;TXK;CRTAM;NOD2;CFI;CARD9;ZP3;C5AR1;MATR3;FCGR3A;AIM2;SH2D1A;PRKACB;KLK7;FCN3;CLEC4E;RAET1G
GO:0002253	activation of immune response	http://amigo.geneontology.org/amigo/term/GO:0002253	534	29	12.5281	2.31479	2.57259e-05	0.033117	640;728;2212;2214;2357;3385;3426;3702;4589;5567;5583;7100;7294;7409;8547;9447;9782;11006;11027;26253;54923;55765;64127;64170;79037;89857;115352;149628;100526737	PRKCH;TLR5;ITK;ICAM3;PVRIG;VAV1;INAVA;BLK;FCGR2A;LIME1;KLHL6;FCRL3;PYHIN1;FPR1;RBM14-RBM4;LILRB4;LILRA2;MUC7;TXK;NOD2;CFI;CARD9;C5AR1;MATR3;FCGR3A;AIM2;PRKACB;FCN3;CLEC4E
GO:0002682	regulation of immune system process	http://amigo.geneontology.org/amigo/term/GO:0002682	1400	57	32.8453	1.73541	2.84153e-05	0.033117	136;383;640;728;923;1235;1776;2212;2214;2357;2796;2841;3385;3426;3575;3702;3821;3824;3949;4068;4589;5567;5583;5650;6693;7100;7294;7409;7704;7784;8547;9447;9782;11006;11027;26253;26279;26585;51237;54923;55765;56253;64127;64170;64783;79037;81030;84293;85477;89857;115352;140685;146894;149628;353091;440712;100526737	PRKCH;IL7R;TLR5;ITK;ZBTB46;CD6;ICAM3;PVRIG;VAV1;INAVA;BLK;FCGR2A;ZBP1;ARG1;LIME1;KLHL6;FCRL3;LDLR;PLA2G2D;SCIN;ADORA2B;DNASE1L3;PYHIN1;FPR1;KLRD1;KLRC1;RBM14-RBM4;LILRB4;LILRA2;SPN;CCR6;MUC7;TXK;GPR18;CD300LG;CRTAM;NOD2;MZB1;CFI;PRXL2A;CARD9;ZP3;C5AR1;MATR3;RBM15;FCGR3A;RHEX;AIM2;SH2D1A;ZBTB16;PRKACB;GNRH1;KLK7;FCN3;CLEC4E;RAET1G;GREM1
GO:0002429	immune response-activating cell surface receptor signaling pathway	http://amigo.geneontology.org/amigo/term/GO:0002429	300	20	7.03828	2.8416	2.91427e-05	0.033117	640;728;2212;2214;2357;3385;3702;4589;5567;5583;7294;7409;11006;11027;26253;54923;64170;79037;89857;115352	PRKCH;ITK;ICAM3;PVRIG;VAV1;BLK;FCGR2A;LIME1;KLHL6;FCRL3;FPR1;LILRB4;LILRA2;MUC7;TXK;CARD9;C5AR1;FCGR3A;PRKACB;CLEC4E
GO:0006968	cellular defense response	http://amigo.geneontology.org/amigo/term/GO:0006968	55	8	1.29035	6.19986	3.96615e-05	0.0400417	136;728;1235;3702;4068;6693;10219;10578	ITK;ADORA2B;GNLY;SPN;CCR6;KLRG1;C5AR1;SH2D1A
GO:0050776	regulation of immune response	http://amigo.geneontology.org/amigo/term/GO:0050776	909	41	21.326	1.92254	4.65141e-05	0.0400417	136;383;640;728;2212;2214;2357;3385;3426;3575;3702;3821;3824;4068;4589;5567;5583;5650;7100;7294;7409;7784;8547;9447;9782;11006;11027;26253;54923;55765;56253;64127;64170;79037;81030;89857;115352;146894;149628;353091;100526737	PRKCH;IL7R;TLR5;ITK;ICAM3;PVRIG;VAV1;INAVA;BLK;FCGR2A;ZBP1;ARG1;LIME1;KLHL6;FCRL3;ADORA2B;PYHIN1;FPR1;KLRD1;KLRC1;RBM14-RBM4;LILRB4;LILRA2;MUC7;TXK;CD300LG;CRTAM;NOD2;CFI;CARD9;ZP3;C5AR1;MATR3;FCGR3A;AIM2;SH2D1A;PRKACB;KLK7;FCN3;CLEC4E;RAET1G
Type1 vs Type2 filtered(performed on subset of genes which had functional isoform switch)
geneSet	description	link	size	overlap	expect	enrichmentRatio	pValue	FDR	overlapId	userId
GO:0006955	immune response	http://amigo.geneontology.org/amigo/term/GO:0006955	1919	60	33.9677	1.76639	7.2983e-06	0.0360867	26;136;383;608;640;728;923;1116;1235;1521;1776;2161;2212;2357;2643;2829;3385;3426;3561;3575;3702;3821;3824;3955;4035;4155;4316;4680;5567;5583;5699;6693;7100;7294;7409;7784;9447;10068;10219;10261;10663;10800;26253;53916;54509;54923;55765;56253;57817;64127;64170;64218;64386;79037;81030;89857;115352;146894;149628;353091	AOC1;MMP25;CD6;PRKCH;TNFRSF17;TXK;ICAM3;CEACAM6;HAMP;LFNG;CRTAM;CCR6;ITK;ARG1;LRP1;ZBP1;F12;GCH1;CHI3L1;KLRD1;KLRC1;BLK;IL18BP;MMP7;KLRG1;RHOF;IGSF6;VAV1;PRKACB;FCGR2A;IL2RG;FCRL3;CD300LG;INAVA;PYHIN1;AIM2;DNASE1L3;CLEC4E;NOD2;RAB4B;IL7R;ADORA2B;FPR1;CXCR6;CTSW;KLHL6;CYSLTR1;XCR1;TLR5;CARD9;ZP3;SEMA4A;C5AR1;SPN;MBP;RAET1G;LIME1;PSMB10;CFI;PVRIG
GO:0031349	positive regulation of defense response	http://amigo.geneontology.org/amigo/term/GO:0031349	427	22	7.5582	2.91075	7.93898e-06	0.0360867	136;383;923;2161;3385;3949;5567;7052;7100;7294;7409;7784;9447;26253;55765;56253;64127;64170;81030;115352;149628;353091	CD6;TXK;ICAM3;CRTAM;ARG1;ZBP1;LDLR;F12;VAV1;PRKACB;FCRL3;INAVA;PYHIN1;AIM2;CLEC4E;NOD2;ADORA2B;TLR5;CARD9;ZP3;TGM2;RAET1G
GO:0002684	positive regulation of immune system process	http://amigo.geneontology.org/amigo/term/GO:0002684	979	36	17.329	2.07744	2.55946e-05	0.0654051	136;383;640;728;923;1235;2212;2357;3385;3426;3575;3702;5567;5583;6693;7100;7294;7409;7704;7784;9447;26253;51237;54923;55765;56253;64127;64170;79037;81030;85477;89857;115352;140685;149628;353091	SCIN;CD6;PRKCH;TXK;ICAM3;ZBTB16;CRTAM;CCR6;ITK;ARG1;ZBP1;ZBTB46;BLK;VAV1;PRKACB;FCGR2A;FCRL3;INAVA;PYHIN1;AIM2;CLEC4E;NOD2;IL7R;ADORA2B;MZB1;FPR1;KLHL6;TLR5;CARD9;ZP3;C5AR1;SPN;RAET1G;LIME1;CFI;PVRIG
GO:0032494	response to peptidoglycan	http://amigo.geneontology.org/amigo/term/GO:0032494	11	4	0.194708	20.5436	2.8778e-05	0.0654051	728;55765;64127;64170	INAVA;NOD2;CARD9;C5AR1
GO:0002429	immune response-activating cell surface receptor signaling pathway	http://amigo.geneontology.org/amigo/term/GO:0002429	300	16	5.31021	3.01306	9.32867e-05	0.164286	640;728;2212;2357;3385;3702;5567;5583;7294;7409;26253;54923;64170;79037;89857;115352	PRKCH;TXK;ICAM3;ITK;BLK;VAV1;PRKACB;FCGR2A;FCRL3;CLEC4E;FPR1;KLHL6;CARD9;C5AR1;LIME1;PVRIG
GO:0006952	defense response	http://amigo.geneontology.org/amigo/term/GO:0006952	1518	47	26.8697	1.74918	0.000108427	0.164286	136;383;728;923;1116;1235;1776;2161;2357;2643;2829;3385;3426;3702;3824;3949;4035;4137;4316;5567;5739;6693;7052;7100;7110;7294;7409;7784;9447;10219;10663;10800;11262;26253;55765;56253;56413;57817;64127;64170;64386;81030;115352;116071;149628;353091;100137049	MMP25;CD6;TXK;ICAM3;SP140;HAMP;CRTAM;CCR6;ITK;ARG1;LRP1;ZBP1;LDLR;F12;GCH1;CHI3L1;KLRD1;MMP7;KLRG1;VAV1;PRKACB;TMF1;PTGIR;FCRL3;INAVA;PYHIN1;AIM2;DNASE1L3;CLEC4E;NOD2;BATF2;ADORA2B;FPR1;CXCR6;CYSLTR1;XCR1;MAPT;TLR5;CARD9;ZP3;C5AR1;SPN;TGM2;RAET1G;CFI;LTB4R2;PLA2G4B
GO:0050891	multicellular organismal water homeostasis	http://amigo.geneontology.org/amigo/term/GO:0050891	64	7	1.13285	6.17913	0.000132869	0.16747	239;1364;5567;6337;66002;84283;126695	ALOX12;SCNN1A;PRKACB;TMEM79;KDF1;CYP4F12;CLDN4
GO:0050778	positive regulation of immune response	http://amigo.geneontology.org/amigo/term/GO:0050778	706	27	12.4967	2.16057	0.000147648	0.16747	136;640;728;2212;2357;3385;3426;3702;5567;5583;7100;7294;7409;7784;9447;26253;54923;55765;56253;64127;64170;79037;81030;89857;115352;149628;353091	PRKCH;TXK;ICAM3;CRTAM;ITK;ZBP1;BLK;VAV1;PRKACB;FCGR2A;FCRL3;INAVA;PYHIN1;AIM2;CLEC4E;NOD2;ADORA2B;FPR1;KLHL6;TLR5;CARD9;ZP3;C5AR1;RAET1G;LIME1;CFI;PVRIG
GO:0050776	regulation of immune response	http://amigo.geneontology.org/amigo/term/GO:0050776	909	32	16.0899	1.98882	0.000165794	0.16747	136;383;640;728;2212;2357;3385;3426;3575;3702;3821;3824;5567;5583;7100;7294;7409;7784;9447;26253;54923;55765;56253;64127;64170;79037;81030;89857;115352;146894;149628;353091	PRKCH;TXK;ICAM3;CRTAM;ITK;ARG1;ZBP1;KLRD1;KLRC1;BLK;VAV1;PRKACB;FCGR2A;FCRL3;CD300LG;INAVA;PYHIN1;AIM2;CLEC4E;NOD2;IL7R;ADORA2B;FPR1;KLHL6;TLR5;CARD9;ZP3;C5AR1;RAET1G;LIME1;CFI;PVRIG
GO:0030104	water homeostasis	http://amigo.geneontology.org/amigo/term/GO:0030104	68	7	1.20365	5.81565	0.000195235	0.174441	239;1364;5567;6337;66002;84283;126695	ALOX12;SCNN1A;PRKACB;TMEM79;KDF1;CYP4F12;CLDN4
